# Supplementary material
Source: PubMed Central journal article supplement (PMC7178439)
Supplement: btz926_supplementary_data.pdf [file btz926_supplementary_data.pdf]

# Supporting Information

## Table of Content

### Supporting Texts

**Text S1.** IS-score definition and calculation.

**Text S2.** Physics-based  $\Delta\Delta G_{EvoEF}$  calculation using EvoEF.

### Supporting Tables

**Table S1.** The iPTM matrix for the interface structure alignments.

**Table S2.** Number of interface structural and sequence analogs obtained by iAlign and PSI-BLAST for the 177 dimeric complexes.

**Table S3.** Summary of the weights for the original EvoEF and the new weights optimized using the new training set.

**Table S4.** Summary of the parameters and pseudocounts in SSIPe.

**Table S5.** CD-HIT clustering results on the 177 protein-protein complexes.

**Table S6.** Experimental data for the training set (TrainSet).

**Table S7.** Experimental data for TestSet1.

**Table S8.** Experimental data for TestSet2.

**Table S9.** Experimental data for CAPRI target T55.

**Table S10.** Experimental data for CAPRI target T56.

**Table S11.** Pairwise comparison of  $\Delta\Delta G_{bind}$  estimation results for the common mutations in TestSet1.

**Table S12.** Summary of reported prediction performance of methods tested in this work.

**Table S13.** Experimental and estimated  $\Delta\Delta G_{bind}$  and absolute estimation errors for selected mutations in 1LFD and 4WND.

### Supporting Figures

**Fig. S1.** Kendall's tau rank correlation coefficient between predictions and experiments during the 26<sup>th</sup> round of the CAPRI experiment.

## Supporting Texts

**Text S1.** IS-score definition and calculation.

Pairwise interface structural alignments are performed by iAlign (Gao and Skolnick, 2010), which uses the IS-score to determine interface similarity. IS-score is defined as:

$$IS - score = \frac{S + s_0}{1 + s_0} \quad (S1)$$

where:

$$S = \frac{1}{L_Q} \sum_{i=1}^{N_a} \frac{f_i}{1 + \left(\frac{d_i}{d_0}\right)^2} \quad (S2)$$

is the raw similarity score, and  $s_0 = 0.18 - \frac{0.35}{L_Q^{0.3}}$  is the scaling factor used to make the IS-score length independent.  $L_Q$  is the length of the query,  $N_a$  is the number of aligned interface residues,  $f_i$  is the fraction of conserved interface contacts at the  $i^{th}$  aligned position, and  $d_i/d_0$  is the normalized C $\alpha$  distance at the  $i^{th}$  aligned position. IS-score varies from (0, 1], where a larger value indicates a higher similarity.

**Text S2.** Physics-based  $\Delta\Delta G_{EvoEF}$  calculation.

EvoEF is a physics-based energy function designed to describe the atomic interactions in proteins and was first implemented in our protein design protocol EvoDesign (Pearce, et al., 2019). In general, it consists of five energy terms as shown in Eq. S3:

$$E_{EvoEF} = E_{VDW} + E_{ELEC} + E_{HB} + E_{DESOLV} - E_{REF} \quad (S3)$$

$$E_{VDW} = \sum_{i,j} w_{vdw} E_{vdw}(i,j) \quad (S4)$$

$$E_{ELEC} = \sum_{i,j} w_{elec} E_{elec}(i,j) \quad (S5)$$

$$E_{HB} = \sum_{i,j} w_{hb} E_{hb}(i,j) \quad (S6)$$

$$E_{DESOLV} = \sum_{i,j} w_{desolv} E_{desolv}(i,j) \quad (S7)$$

$$E_{REF} = \sum_{l=1}^L E_{ref}(aa_l) \quad (S8)$$

In Eqs. S3-S8,  $E_{VDW}$ ,  $E_{ELEC}$ ,  $E_{HB}$ ,  $E_{DESOLV}$ , and  $E_{REF}$  are the total van der Waals, electrostatic, hydrogen bonding, desolvation and reference energy of the protein system.  $E_{vdw}(i,j)$ ,  $E_{elec}(i,j)$ ,  $E_{hb}(i,j)$ , and  $E_{desolv}(i,j)$  are the pairwise corresponding interaction between non-bonded atoms  $i$  and  $j$ . The  $w_{vdw}$ ,  $w_{elec}$ ,  $w_{hb}$  and  $w_{desolv}$  are the relative weights for the corresponding energy terms.  $E_{ref}(aa_l)$  is the amino acid-specific reference energy used to model the energy of an amino acid in the unfolded state, and the reference energy of a protein ( $E_{REF}$ ) is assumed to be the summation of each individual amino acid  $E_{ref}(aa_l)$  at position  $l$  across the whole protein chain with length  $L$ .  $E_{ref}(aa_l)$  is a parameter that was determined for each amino acid  $aa$ .

$E_{vdw}(i,j)$ , is the van der Waals energy between atoms  $i$  and  $j$ , which was modified from the Lennard-Jones (LJ) 12-6 potential (Jones, 1924a; Jones, 1924b), and describes the atomic packing interactions as follows:

$$E_{vdw}(i,j) = \begin{cases} \min \left\{ 5.0 \varepsilon_{ij}, \varepsilon_{ij} \left[ \left( \frac{\sigma_{ij}}{d_{ij}} \right)^{12} - 2 \left( \frac{\sigma_{ij}}{d_{ij}} \right)^6 \right] \right\}, & \text{if } d_{ij} < 0.8909 \sigma_{ij} \\ \varepsilon_{ij} \left[ \left( \frac{\sigma_{ij}}{d_{ij}} \right)^{12} - 2 \left( \frac{\sigma_{ij}}{d_{ij}} \right)^6 \right], & \text{if } 0.8909 \sigma_{ij} \leq d_{ij} < 5.0 \\ A * d_{ij}^3 + B * d_{ij}^2 + C * d_{ij} + D, & \text{if } 5.0 \leq d_{ij} < 6.0 \\ 0, & \text{if } d_{ij} \geq 6.0 \end{cases} \quad (S9)$$

$$\begin{cases} A = -0.4\varepsilon_{ij} \left(\frac{\sigma_{ij}}{5.0}\right)^{12} - 1.6\varepsilon_{ij} \left(\frac{\sigma_{ij}}{5.0}\right)^6 \\ B = 7.8\varepsilon_{ij} \left(\frac{\sigma_{ij}}{5.0}\right)^{12} + 25.2\varepsilon_{ij} \left(\frac{\sigma_{ij}}{5.0}\right)^6 \\ C = -50.4\varepsilon_{ij} \left(\frac{\sigma_{ij}}{5.0}\right)^{12} + 129.6\varepsilon_{ij} \left(\frac{\sigma_{ij}}{5.0}\right)^6 \\ D = 108\varepsilon_{ij} \left(\frac{\sigma_{ij}}{5.0}\right)^{12} + 216\varepsilon_{ij} \left(\frac{\sigma_{ij}}{5.0}\right)^6 \end{cases} \quad (S10)$$

where  $d_{ij}$  is the distance between the two atoms  $i$  and  $j$ ,  $\sigma_{ij} = \sigma_i + \sigma_j$  is the sum of their van der Waals atomic radii and  $\varepsilon_{ij}$  is the combined well-depth for atoms  $i$  and  $j$ , which are taken from the CHARMM19 force field (Brooks, et al., 1983). The attractive and repulsive components of the van der Waals energy are split at  $d_{ij} = 0.8909\sigma_{ij}$ . A maximum distance cutoff of 6.0 Å is set to increase the computational efficiency of EvoEF, and a cubic function is used to continuously connect the LJ energy from its value at 5.0 Å to zero at the cutoff distance (6.0 Å). For the repulsive component of the LJ potential, the maximum energy cutoff is set to  $5.0\varepsilon_{ij}$ , which helps alleviate possible clashes, while not overly penalizing them due to the discrete rotameric conformations used in protein design. The weights for the attractive and repulsive energies were separately determined.

$E_{elec}(i, j)$  is used to determine the electrostatic interactions between partially charged non-bonded atoms  $i$  and  $j$  in a protein system:

$$E_{elec}(i, j) = \begin{cases} \frac{C_0 q_i q_j}{\varepsilon(0.8\sigma_{ij}) 0.8\sigma_{ij}} \frac{1}{0.8\sigma_{ij}}, & \text{if } d_{ij} < 0.8\sigma_{ij} \\ \frac{C_0 q_i q_j}{\varepsilon(d_{ij}) d_{ij}} \frac{1}{d_{ij}}, & \text{if } 0.8\sigma_{ij} < d_{ij} < 6.0 \\ 0, & \text{if } d_{ij} \geq 6.0 \end{cases} \quad (S11)$$

where  $q_i$  and  $q_j$  are the PARSE atomic charges (Sitkoff, et al., 1994). Furthermore,  $C_0 = 332 \text{ Å kcal mol}^{-1} e^{-2}$ , where  $e$  is the elementary charge, and  $\varepsilon(d_{ij})$  is the distance-dependent dielectric constant, defined as  $\varepsilon(d_{ij}) = 40d_{ij}$ . The distance  $d_{ij}$  is set to  $0.8\sigma_{ij}$  if  $d_{ij}$  is less than  $0.8\sigma_{ij}$ , when calculating the electrostatics term and dielectric constant. This avoids the electrostatics energy being an infinite value when  $d_{ij}$  is close to zero. Again, for the sake of computational efficiency, the electrostatics energy is set to zero if  $d_{ij}$  is beyond the maximum distance cutoff 6.0 Å.

$E_{hb}(i, j)$  is used to calculate the hydrogen-bonding interactions between potential hydrogen bond donor/acceptor pairs of atoms  $i$  and  $j$ , one of which should be a polar hydrogen.  $E_{hb}(i, j)$  is a linear combination of three energy terms that depend on the hydrogen-acceptor distance ( $d_{ij}^{HA}$ ), the angle between the donor atom, hydrogen and acceptor ( $\theta_{ij}^{DHA}$ ), and the angle between the hydrogen, acceptor and base atom ( $\varphi_{ij}^{HAB}$ ):

$$E_{hb}(i, j) = w_{d_{HA}} E(d_{ij}^{HA}) + w_{\theta_{DHA}} E(\theta_{ij}^{DHA}) + w_{\varphi_{HAB}} E(\varphi_{ij}^{HAB}) \quad (S12)$$

where:

$$\begin{cases} E(d_{ij}^{HA}) = \begin{cases} -\cos\left[\frac{\pi}{2}(d_{ij}^{HA} - 1.9)/(1.9 - d_{min})\right], & d_{min} \leq d_{HA} \leq 1.9 \\ -0.5 \cos\left[\pi(d_{ij}^{HA} - 1.9)/(d_{max} - 1.9)\right] - 0.5, & 1.9 \text{ \AA} < d_{HA} \leq d_{max} \\ 0, & \text{otherwise} \end{cases} \\ E(\theta_{ij}^{DHA}) = -\cos^4(\theta_{ij}^{DHA}) \\ E(\varphi_{ij}^{HAB}) = \begin{cases} -\cos^4(\varphi_{ij}^{HAB} - 150), & \text{for BBHB and for } sp^2 \text{ in SBHB or SSHB} \\ -\cos^4(\varphi_{ij}^{HAB} - 135), & \text{for } sp^3 \text{ in SBHB or SSHB} \end{cases} \end{cases} \quad (S13)$$

The optimal distance between the hydrogen and its acceptor is set to 1.9 Å, which is taken from Kortemme *et al.* (Kortemme, et al., 2003). Additionally,  $d_{min} = 1.4$  Å and  $d_{max} = 3.0$  Å are the lower and upper bounds on the distance between the hydrogen-acceptor pair. The optimal  $\varphi_{ij}^{HAB}$  value is set to either 150° or 135°, depending on the acceptor hybridization ( $sp^2$  or  $sp^3$ ) and the locations of the donor and acceptor atoms (BBHB: Backbone-Backbone Hydrogen Bond; SBHB: Sidechain-Backbone Hydrogen Bond; SSHB: Sidechain-Sidechain Hydrogen Bond).

$E_{desolv}(i, j)$  is used to describe the desolvation energy using the pairwise Gaussian volume-excluded implicit solvation model developed by Lazaridis and Karplus (Lazaridis and Karplus, 1999). The pairwise  $E_{desolv}(i, j)$  is counted as the sum of the energy of atom  $i$  being desolvated by atom  $j$  ( $f_{desolv}(i, j)$ ) and atom  $j$  being desolvated by atom  $i$  ( $f_{desolv}(j, i)$ ), as shown in Eq. S14:

$$E_{desolv}(i, j) = f_{desolv}(i, j) + f_{desolv}(j, i) \quad (S14)$$

$$f_{desolv}(i, j) = -V_j \frac{\Delta G_i^{free}}{2\pi^2 \lambda_i d_{ij}^2} \exp\left[-\left(\frac{d_{ij} - \sigma_i}{\lambda_i}\right)^2\right] \quad (S15)$$

$$f_{desolv}(j, i) = -V_i \frac{\Delta G_j^{free}}{2\pi^2 \lambda_j d_{ij}^2} \exp\left[-\left(\frac{d_{ij} - \sigma_j}{\lambda_j}\right)^2\right] \quad (S16)$$

where  $V_{i,j}$ ,  $\Delta G_{i,j}^{free}$ , and  $\lambda_{i,j}$  are the volumes, reference solvation energies, and correlation lengths for atoms  $i$  and  $j$ , respectively. All types of carbon and sulphur atoms are considered to be nonpolar, while oxygen and nitrogen atoms are considered to be polar. The desolvation energy for hydrogen atoms is ignored in the Lazaridis-Karplus model, while the desolvation energy for other polar and nonpolar atoms are separately calculated and weighted. Specifically,  $E_{DESOLV} = \sum w_{desolvPolar} f_{desolvPolar} + \sum w_{desolvNonP} f_{desolvNonP}$ .

To estimate the  $\Delta\Delta G_{bind}$  using EvoEF, we first need to minimize the energy of the user-provided structure, build a structural model for the mutant and calculate the binding energy of the wild-type ( $\Delta G_{bind}^{WT}$ ) and mutant ( $\Delta G_{bind}^{mut}$ ) complexes. Specifically, the following steps are performed:

**Step 1:** We extract the target dimeric protein chains, clean the structures and remove the water molecules and ligand that are not amino acids.

**Step 2:** We optimize the amino-acid side chains of the structure of the wild-type complex using EvoEF's "RepairStructure" command:

```
./EvoEF --command=RepairStructure --pdb=WT.pdb
```

Following this command, the minimized wild type complex will be output into a file named 'WT\_Repair.pdb' and this minimized model is used as the initial structure to build the mutant model.

**Step 3:** Build the mutant model using EvoEF's "BuildMutant" command:

```
./EvoEF --command=BuildMutant --pdb=WT_Repair.pdb --mutant-file=mutation.txt
```

Here, the file "mutation.txt" contains the list of mutation(s). Following this command, a new file "WT\_Repair\_Mutant\_1.pdb" that contains the modelled mutant structure will be generated if you have only one mutant in the file "mutation.txt". If you have more than one (i.e., N) mutations, N files named "WT\_Repair\_Mutant\_1.pdb", "WT\_Repair\_Mutant\_2.pdb", ..., "WT\_Repair\_Mutant\_N.pdb" will be generated for the corresponding mutations.

**Step 4:** We computed the binding energy of the wild-type and mutant complex using EvoEF's "ComputeBinding" command:

```
./EvoEF --command=ComputeBinding --pdb=WT_Repair.pdb
```

```
./EvoEF --command=ComputeBinding --pdb=WT_Repair_Mutant_1.pdb
```

Following the command, the  $\Delta G_{bind}^{WT}$  and  $\Delta G_{bind}^{mut}$  will be obtained, and then the  $\Delta\Delta G_{bind}$  is calculated as  $\Delta\Delta G_{bind}^{WT \rightarrow mut} = \Delta G_{bind}^{mut} - \Delta G_{bind}^{WT}$ .

The source code and manual of EvoEF, as well as the estimated  $\Delta\Delta G_{bind}$  values are freely available at: <https://zhanglab.ccmb.med.umich.edu/SSIPE/download>.

### Supporting Tables

**Table S1.** The iPTM matrix for the interface structure alignments. A substitution probability is read as  $M(i, j)$ , where  $i$  and  $j$  are the amino acid in the column and row, respectively.

|     | A   | C   | D   | E   | F   | G   | H   | I   | K   | L   | M   | N   | P   | Q   | R   | S   | T   | V   | W   | Y   |
|-----|-----|-----|-----|-----|-----|-----|-----|-----|-----|-----|-----|-----|-----|-----|-----|-----|-----|-----|-----|-----|
| A   | .30 | .06 | .03 | .04 | .04 | .12 | .04 | .04 | .04 | .04 | .06 | .04 | .07 | .04 | .04 | .11 | .07 | .06 | .03 | .03 |
| C   | .01 | .51 | .00 | .00 | .00 | .00 | .00 | .01 | .00 | .01 | .01 | .01 | .02 | .00 | .00 | .01 | .01 | .01 | .00 | .00 |
| D   | .02 | .01 | .42 | .06 | .01 | .01 | .03 | .01 | .03 | .01 | .02 | .04 | .02 | .03 | .03 | .03 | .02 | .01 | .01 | .01 |
| E   | .05 | .02 | .13 | .32 | .02 | .01 | .05 | .05 | .13 | .04 | .05 | .06 | .03 | .15 | .09 | .06 | .07 | .04 | .02 | .03 |
| F   | .02 | .01 | .01 | .01 | .39 | .01 | .03 | .03 | .01 | .02 | .04 | .01 | .01 | .02 | .01 | .01 | .01 | .02 | .11 | .11 |
| G   | .08 | .01 | .01 | .01 | .01 | .65 | .02 | .01 | .01 | .01 | .01 | .02 | .02 | .01 | .01 | .04 | .02 | .01 | .02 | .01 |
| H   | .01 | .01 | .01 | .01 | .02 | .01 | .41 | .01 | .01 | .01 | .01 | .02 | .01 | .02 | .02 | .01 | .01 | .01 | .01 | .03 |
| I   | .04 | .04 | .02 | .04 | .05 | .01 | .03 | .21 | .05 | .08 | .09 | .07 | .02 | .05 | .04 | .03 | .05 | .13 | .03 | .03 |
| K   | .04 | .02 | .05 | .10 | .02 | .01 | .03 | .05 | .21 | .05 | .04 | .06 | .02 | .10 | .12 | .04 | .05 | .05 | .02 | .02 |
| L   | .12 | .08 | .06 | .09 | .13 | .03 | .07 | .22 | .14 | .45 | .24 | .13 | .03 | .12 | .09 | .08 | .12 | .18 | .08 | .11 |
| M   | .02 | .01 | .01 | .02 | .03 | .01 | .01 | .03 | .02 | .03 | .16 | .02 | .01 | .02 | .02 | .01 | .02 | .02 | .01 | .02 |
| N   | .03 | .03 | .05 | .03 | .02 | .02 | .05 | .05 | .04 | .04 | .03 | .25 | .01 | .04 | .04 | .04 | .04 | .05 | .01 | .03 |
| P   | .02 | .02 | .01 | .01 | .01 | .01 | .01 | .01 | .01 | .00 | .00 | .01 | .60 | .01 | .01 | .01 | .01 | .01 | .01 | .01 |
| Q   | .03 | .01 | .04 | .09 | .02 | .01 | .04 | .03 | .07 | .03 | .05 | .04 | .01 | .22 | .06 | .03 | .04 | .03 | .02 | .02 |
| R   | .03 | .01 | .04 | .06 | .02 | .01 | .04 | .03 | .10 | .03 | .03 | .04 | .02 | .06 | .32 | .03 | .04 | .03 | .02 | .02 |
| S   | .07 | .04 | .03 | .03 | .01 | .03 | .03 | .02 | .03 | .02 | .02 | .04 | .03 | .03 | .03 | .30 | .07 | .03 | .01 | .03 |
| T   | .05 | .05 | .03 | .04 | .02 | .01 | .03 | .04 | .04 | .03 | .04 | .05 | .04 | .04 | .04 | .07 | .27 | .04 | .02 | .02 |
| V   | .07 | .05 | .03 | .04 | .04 | .02 | .03 | .15 | .05 | .08 | .07 | .09 | .03 | .04 | .04 | .05 | .07 | .26 | .02 | .03 |
| W   | .01 | .00 | .00 | .00 | .04 | .00 | .01 | .01 | .00 | .01 | .01 | .00 | .01 | .00 | .00 | .00 | .00 | .00 | .54 | .02 |
| Y   | .01 | .01 | .01 | .01 | .10 | .01 | .04 | .01 | .01 | .02 | .02 | .02 | .01 | .01 | .01 | .02 | .01 | .01 | .05 | .42 |
| Sum | 1.0 | 1.0 | 1.0 | 1.0 | 1.0 | 1.0 | 1.0 | 1.0 | 1.0 | 1.0 | 1.0 | 1.0 | 1.0 | 1.0 | 1.0 | 1.0 | 1.0 | 1.0 | 1.0 | 1.0 |

**Table S2.** Number of interface structural and sequence analogs obtained by iAlign and PSI-BLAST for the 177 dimeric complexes. The IS-score cutoff was 0.5. The STRING link score cutoff as well as the maximum and minimum sequence identity cutoffs were 0.8, 0.6 and 0.3, respectively. ‘#struct’ indicates the number of interface structural analogs, and ‘#seq’ indicates the number of interface sequence analogs with the optimal cutoffs applied. As a comparison, ‘#rawseq’ indicates the number of raw interface sequence analogs obtained without any cutoff.

| PDB  | #struct | #seq | #rawseq | PDB  | #struct | #seq | #rawseq | PDB  | #struct | #seq | #rawseq |
|------|---------|------|---------|------|---------|------|---------|------|---------|------|---------|
| 1A22 | 4       | 2    | 93      | 1TM1 | 7       | 0    | 0       | 3EG5 | 1       | 0    | 179     |
| 1A4Y | 1       | 1    | 52      | 1TM3 | 8       | 0    | 0       | 3EQS | 5       | 0    | 0       |
| 1ACB | 49      | 0    | 0       | 1TM4 | 7       | 0    | 0       | 3EQY | 4       | 0    | 0       |
| 1AK4 | 7       | 0    | 0       | 1TM5 | 7       | 0    | 0       | 3F1S | 1       | 1    | 157     |
| 1B2S | 2       | 4    | 48      | 1TM7 | 9       | 0    | 0       | 3KBH | 0       | 0    | 0       |
| 1B2U | 3       | 4    | 47      | 1TMG | 8       | 0    | 0       | 3KUD | 1       | 1    | 110     |
| 1B3S | 3       | 2    | 56      | 1TO1 | 8       | 0    | 0       | 3LB6 | 2       | 1    | 31      |
| 1B41 | 1       | 0    | 0       | 1UUZ | 2       | 0    | 0       | 3M62 | 1       | 1    | 95      |
| 1BP3 | 2       | 3    | 93      | 1WQJ | 1       | 2    | 79      | 3M63 | 1       | 1    | 221     |
| 1BRS | 3       | 2    | 53      | 1X1X | 3       | 3    | 48      | 3MZG | 4       | 3    | 90      |
| 1C1Y | 0       | 0    | 110     | 1XD3 | 4       | 0    | 203     | 3N06 | 4       | 3    | 89      |
| 1CSE | 8       | 0    | 0       | 1Y1K | 7       | 0    | 0       | 3NCB | 4       | 2    | 89      |
| 1CSO | 11      | 0    | 0       | 1Y33 | 7       | 0    | 0       | 3NCC | 4       | 3    | 90      |
| 1CT0 | 8       | 0    | 0       | 1Y34 | 7       | 0    | 0       | 3NVN | 1       | 2    | 245     |
| 1CT2 | 10      | 0    | 0       | 1Y3B | 8       | 0    | 0       | 3NVQ | 2       | 0    | 208     |
| 1CT4 | 12      | 0    | 0       | 1Y4A | 7       | 0    | 0       | 3Q3J | 2       | 1    | 141     |
| 1E50 | 1       | 1    | 78      | 1Z7X | 2       | 0    | 52      | 3QHY | 1       | 0    | 1       |
| 1E96 | 0       | 0    | 116     | 2A9K | 0       | 0    | 0       | 3RF3 | 13      | 0    | 0       |
| 1EAW | 40      | 1    | 153     | 2AJF | 0       | 0    | 0       | 3S9D | 1       | 4    | 34      |
| 1EFN | 0       | 0    | 0       | 2AW2 | 0       | 1    | 22      | 3SF4 | 1       | 0    | 44      |
| 1EMV | 1       | 2    | 25      | 2B0Z | 0       | 1    | 123     | 3SGB | 6       | 0    | 0       |
| 1F47 | 0       | 0    | 69      | 2B10 | 1       | 0    | 122     | 3TGK | 6       | 0    | 147     |
| 1FC2 | 1       | 0    | 0       | 2B11 | 1       | 0    | 123     | 3U82 | 1       | 0    | 0       |
| 1FCC | 0       | 0    | 0       | 2B42 | 1       | 0    | 0       | 3WWN | 0       | 2    | 48      |
| 1FFW | 1       | 0    | 73      | 2BTF | 1       | 0    | 72      | 4BFI | 0       | 3    | 88      |
| 1FSS | 1       | 0    | 0       | 2C5D | 0       | 0    | 119     | 4CPA | 2       | 0    | 0       |
| 1FY8 | 5       | 0    | 146     | 2DVW | 2       | 1    | 136     | 4CVW | 0       | 0    | 0       |
| 1GC1 | 2       | 0    | 0       | 2FTL | 57      | 0    | 137     | 4FZA | 1       | 2    | 202     |
| 1GL0 | 26      | 0    | 0       | 2G2U | 2       | 0    | 1       | 4G0N | 1       | 0    | 110     |
| 1GL1 | 50      | 0    | 0       | 2G2W | 3       | 0    | 1       | 4G2V | 1       | 0    | 0       |
| 1GUA | 1       | 0    | 112     | 2GOX | 2       | 0    | 0       | 4GU0 | 1       | 0    | 93      |
| 1H9D | 1       | 2    | 77      | 2HLE | 1       | 2    | 153     | 4HRN | 0       | 0    | 91      |
| 1HE8 | 0       | 0    | 179     | 2HRK | 1       | 2    | 17      | 4KRL | 0       | 0    | 15      |
| 1IAR | 1       | 2    | 29      | 2I26 | 1       | 0    | 6       | 4KRO | 0       | 0    | 16      |
| 1JCK | 4       | 0    | 0       | 2J0T | 6       | 1    | 144     | 4KRP | 0       | 0    | 14      |
| 1JTD | 1       | 0    | 1       | 2J1K | 3       | 0    | 0       | 4L0P | 3       | 2    | 154     |
| 1JTG | 2       | 0    | 1       | 2KSO | 0       | 1    | 84      | 4MYW | 1       | 0    | 0       |
| 1K8R | 1       | 0    | 2       | 2NOJ | 3       | 0    | 0       | 4NZW | 0       | 6    | 204     |
| 1KAC | 3       | 0    | 0       | 2NU0 | 29      | 0    | 0       | 4O27 | 0       | 6    | 204     |
| 1KBH | 0       | 1    | 59      | 2NU1 | 20      | 0    | 0       | 4OFY | 0       | 3    | 163     |
| 1KTZ | 1       | 0    | 53      | 2NU2 | 16      | 0    | 0       | 4RA0 | 1       | 0    | 120     |
| 1LFD | 2       | 1    | 129     | 2NU4 | 10      | 0    | 0       | 4RS1 | 0       | 1    | 30      |
| 1M9E | 6       | 0    | 0       | 2O3B | 0       | 2    | 10      | 4WND | 1       | 0    | 46      |
| 1MAH | 1       | 0    | 0       | 2OOB | 0       | 0    | 61      | 4Y61 | 0       | 0    | 147     |
| 1OHZ | 3       | 1    | 19      | 2PCB | 0       | 2    | 123     | 4YEB | 0       | 1    | 82      |
| 1P69 | 3       | 0    | 0       | 2PCC | 1       | 1    | 122     | 4YFD | 0       | 0    | 55      |
| 1P6A | 2       | 0    | 0       | 2REX | 3       | 1    | 141     | 4YH7 | 0       | 0    | 132     |
| 1PPF | 37      | 0    | 3       | 2SGP | 8       | 0    | 0       | 5CXB | 0       | 4    | 268     |
| 1R0R | 8       | 0    | 0       | 2SGQ | 10      | 0    | 0       | 5CYK | 0       | 6    | 268     |



|      |    |   |     |      |   |   |     |                |            |            |             |
|------|----|---|-----|------|---|---|-----|----------------|------------|------------|-------------|
| 1S0W | 2  | 0 | 1   | 2SIC | 7 | 0 | 1   | 5E6P           | 1          | 0          | 96          |
| 1S1Q | 2  | 0 | 192 | 2VLN | 1 | 2 | 25  | 5F4E           | 0          | 1          | 33          |
| 1SBB | 3  | 0 | 0   | 2VLQ | 1 | 2 | 25  | 5K39           | 2          | 1          | 6           |
| 1SBN | 7  | 0 | 0   | 2VN5 | 3 | 1 | 21  | 5M2O           | 0          | 0          | 2           |
| 1SGD | 19 | 0 | 0   | 2WPT | 1 | 2 | 24  | 5TAR           | 0          | 0          | 89          |
| 1SGE | 11 | 0 | 0   | 3BK3 | 1 | 1 | 53  | 5UFE           | 0          | 0          | 0           |
| 1SGN | 22 | 0 | 0   | 3BP8 | 1 | 1 | 194 | 5UFQ           | 0          | 0          | 0           |
| 1SGP | 8  | 0 | 0   | 3BT1 | 0 | 1 | 36  | 5XCO           | 0          | 0          | 0           |
| 1SGQ | 7  | 0 | 0   | 3BX1 | 1 | 0 | 0   |                |            |            |             |
| 1SGY | 28 | 0 | 0   | 3D5R | 3 | 0 | 0   |                |            |            |             |
| 1SMF | 67 | 0 | 0   | 3D5S | 3 | 0 | 0   | <b>Average</b> | <b>5.0</b> | <b>0.7</b> | <b>52.5</b> |

**Table S3.** Summary of the weights for the original EvoEF and the new weights optimized using the new training set.

| Classification                                 | Energy terms             | EvoEF weight |                 |
|------------------------------------------------|--------------------------|--------------|-----------------|
|                                                |                          | Original     | New (this work) |
| Inter-residue interactions in different chains | Van der Waals attractive | 0.6384       | 0.6112          |
|                                                | Van der Waals repulsive  | 0.7904       | 0.8130          |
|                                                | Coulomb's electrostatics | 0.0000       | 0.0000          |
|                                                | desolvP                  | 0.4048       | 0.4137          |
|                                                | desolvH                  | 0.3432       | 0.3756          |
|                                                | HBbb_dist                | 0.0000       | 0.5000          |
|                                                | HBbb_theta               | 0.7600       | 0.8800          |
|                                                | HBbb_phi                 | 0.5000       | 0.7500          |
|                                                | HBsb_dist                | 0.0000       | 0.0000          |
|                                                | HBsb_theta               | 0.6552       | 0.6105          |
|                                                | HBsb_phi                 | 0.5236       | 0.4096          |
|                                                | HBss_dist                | 0.7200       | 0.7516          |
|                                                | HBss_theta               | 0.6720       | 0.3576          |
|                                                | HBss_phi                 | 0.5040       | 0.5014          |

**Table S4.** Summary of the parameters and pseudocounts in SSIPe.

| Parameter name  | Value                                                                                                                                                                  |
|-----------------|------------------------------------------------------------------------------------------------------------------------------------------------------------------------|
| Pseudocounts    | A (25), C (27), D (23), E (24), F (30),<br>G (25), H (25), I (27), K (22), L (33),<br>M (29), N (23), P (18), Q (22), R(24),<br>S (23), T (28), V (28), W (32), Y (31) |
| $C_{IS-score}$  | 0.5                                                                                                                                                                    |
| $C_{linkscore}$ | 0.8                                                                                                                                                                    |
| $C_{maxID}$     | 0.6                                                                                                                                                                    |
| $C_{minID}$     | 0.3                                                                                                                                                                    |
| $\lambda$       | 5                                                                                                                                                                      |
| $w_1$           | 1.55                                                                                                                                                                   |
| $w_2$           | 0.734                                                                                                                                                                  |
| $w_3$           | 0.341                                                                                                                                                                  |
| $w_4$           | 0.205                                                                                                                                                                  |

**Table S5.** CD-HIT clustering results for the 177 protein-protein complexes.

| #Cluster | Representative PDB | Member PDBs                                                                                    |
|----------|--------------------|------------------------------------------------------------------------------------------------|
| 1        | 3BX1               | 2SIC, 1TM1, 1TM7, 1TMG, 1Y1K, 1Y33, 1Y34, 1TM3, 1TM4, 1TM5, 1TO1, 1Y3B, 1SBN, 1Y4A, 1CSE, 1R0R |
| 2        | 1CSO               | 1CT0, 1CT2, 1CT4, 1SGD, 1SGE, 1SGN, 1SGP, 1SGQ, 1SGY, 2NU0, 2NU1, 2NU2, 2NU4, 2SGP, 2SGQ, 3SGB |
| 3        | 1HE8               | 5TAR, 1LFD, 1K8R, 4G0N, 3KUD, 5UFQ, 5UFE, 5XCO                                                 |
| 4        | 1ACB               | 1EAW, 2FTL, 1GL0, 1GL1, 3TGK, 1FY8, 1SMF                                                       |
| 5        | 1JTD               | 3QHY, 2G2U, 2G2W, 1S0W, 1JTG                                                                   |
| 6        | 3MZG               | 3N06, 3NCB, 3NCC, 1BP3, 1A22                                                                   |
| 7        | 2B0Z               | 2B10, 2B11, 2PCC, 2PCB                                                                         |
| 8        | 1B2S               | 1B2U, 1B3S, 1X1X, 1BRS                                                                         |
| 9        | 2GOX               | 3D5R, 3D5S, 2NOJ                                                                               |
| 10       | 1KAC               | 1P69, 1P6A, 2J1K                                                                               |
| 11       | 2VLQ               | 1EMV, 2VLN, 2WPT                                                                               |
| 12       | 4YH7               | 4YFD, 4Y61                                                                                     |
| 13       | 4KRO               | 4KRP, 4KRL                                                                                     |
| 14       | 4O27               | 4FZA, 4NZW                                                                                     |
| 15       | 1MAH               | 1FSS, 1B41                                                                                     |
| 16       | 3SF4               | 4WND, 4G2V                                                                                     |
| 17       | 2A9K               | 1C1Y, 1GUA                                                                                     |
| 18       | 1XD3               | 1S1Q, 2O0B                                                                                     |
| 19       | 3NVQ               | 3NVN                                                                                           |
| 20       | 3M62               | 3M63                                                                                           |
| 21       | 5CXB               | 5CYK                                                                                           |
| 22       | 2AJF               | 3KBH                                                                                           |
| 23       | 1Z7X               | 1A4Y                                                                                           |
| 24       | 4RA0               | 2C5D                                                                                           |
| 25       | 4MYW               | 3U82                                                                                           |
| 26       | 3EG5               | 1E96                                                                                           |
| 27       | 1JCK               | 1SBB                                                                                           |
| 28       | 2HLE               | 4L0P                                                                                           |
| 29       | 1AK4               | 1M9E                                                                                           |
| 30       | 2REX               | 3Q3J                                                                                           |
| 31       | 1FCC               | 1FC2                                                                                           |
| 32       | 1UUZ               | 2I26                                                                                           |
| 33       | 1H9D               | 1E50                                                                                           |
| 34       | 2VN5               | 1OHZ                                                                                           |
| 35       | 3EQY               | 3EQS                                                                                           |
| 36       | 4CVW               |                                                                                                |
| 37       | 4GU0               |                                                                                                |
| 38       | 3F1S               |                                                                                                |
| 39       | 4OFY               |                                                                                                |
| 40       | 4YEB               |                                                                                                |
| 41       | 5E6P               |                                                                                                |
| 42       | 2B42               |                                                                                                |
| 43       | 2BTF               |                                                                                                |
| 44       | 1GC1               |                                                                                                |
| 45       | 3BP8               |                                                                                                |
| 46       | 5F4E               |                                                                                                |
| 47       | 3BT1               |                                                                                                |
| 48       | 4BFI               |                                                                                                |
| 49       | 2O3B               |                                                                                                |
| 50       | 4RS1               |                                                                                                |
| 51       | 3LB6               |                                                                                                |

|    |      |  |
|----|------|--|
| 52 | 4CPA |  |
| 53 | 5K39 |  |
| 54 | 1IAR |  |
| 55 | 3WWN |  |
| 56 | 3S9D |  |
| 57 | 2DVW |  |
| 58 | 2HRK |  |
| 59 | 2J0T |  |
| 60 | 3RF3 |  |
| 61 | 1PPF |  |
| 62 | 5M2O |  |
| 63 | 2AW2 |  |
| 64 | 1FFW |  |
| 65 | 4HRN |  |
| 66 | 1KTZ |  |
| 67 | 3BK3 |  |
| 68 | 1EFN |  |
| 69 | 1F47 |  |
| 70 | 1WQJ |  |
| 71 | 2KSO |  |
| 72 | 1KBH |  |

**Table S6.** Experimental data for the training set (TrainSet).

| PDB  | Chains | Mutations            | Experiment $\Delta\Delta G_{bind}$ |
|------|--------|----------------------|------------------------------------|
| 1A22 | AB     | CA171A               | 1.019                              |
| 1A22 | AB     | CB67A                | 0.000                              |
| 1A22 | AB     | CB81A                | 0.000                              |
| 1A22 | AB     | DA160A               | 0.974                              |
| 1A22 | AB     | DB119A               | 1.530                              |
| 1A22 | AB     | DB85A                | 0.984                              |
| 1A22 | AB     | EA163A               | -0.909                             |
| 1A22 | AB     | EA56A                | 0.624                              |
| 1A22 | AB     | EA56D,RA64M          | 2.002                              |
| 1A22 | AB     | EA65A                | -0.393                             |
| 1A22 | AB     | EB12A                | 1.373                              |
| 1A22 | AB     | EB34A                | -0.099                             |
| 1A22 | AB     | EB79A                | -0.202                             |
| 1A22 | AB     | EB79A,KB80A          | -0.345                             |
| 1A22 | AB     | EB86A                | 0.786                              |
| 1A22 | AB     | FA165A               | 1.024                              |
| 1A22 | AB     | FA165Y               | 1.269                              |
| 1A22 | AB     | FA25A                | -0.424                             |
| 1A22 | AB     | FA25A,YA42A,QA46A    | 0.198                              |
| 1A22 | AB     | HA18A                | -0.346                             |
| 1A22 | AB     | HA21A                | 0.155                              |
| 1A22 | AB     | IA168A               | 0.698                              |
| 1A22 | AB     | IB120A               | 2.154                              |
| 1A22 | AB     | IB62A                | 1.272                              |
| 1A22 | AB     | IB64A                | 1.350                              |
| 1A22 | AB     | KA157A               | -0.052                             |
| 1A22 | AB     | KA157A,EA163A        | -0.769                             |
| 1A22 | AB     | KA161A               | 1.778                              |
| 1A22 | AB     | KA161A,FA165A        | 3.779                              |
| 1A22 | AB     | KB122A               | -0.009                             |
| 1A22 | AB     | KB80A                | 0.080                              |
| 1A22 | AB     | LA45A                | 1.224                              |
| 1A22 | AB     | NA63A                | 0.510                              |
| 1A22 | AB     | NB173A               | 0.286                              |
| 1A22 | AB     | PA48A                | 0.410                              |
| 1A22 | AB     | PA61A                | 1.209                              |
| 1A22 | AB     | PB65A                | 2.965                              |
| 1A22 | AB     | QA22A                | -0.220                             |
| 1A22 | AB     | QA46A                | 0.108                              |
| 1A22 | AB     | QA68A                | 0.787                              |
| 1A22 | AB     | QB121A               | 0.009                              |
| 1A22 | AB     | QB121A,KB122A,VB126A | -0.872                             |
| 1A22 | AB     | QB33A                | -0.194                             |
| 1A22 | AB     | RA156A               | 0.060                              |
| 1A22 | AB     | RA167A               | 2.424                              |
| 1A22 | AB     | RA167K               | 0.953                              |
| 1A22 | AB     | RA167N               | 1.269                              |
| 1A22 | AB     | RA64A                | 1.721                              |
| 1A22 | AB     | RA64A,DA160A         | 3.321                              |
| 1A22 | AB     | RA64K                | -0.314                             |
| 1A22 | AB     | RB11A                | 1.523                              |
| 1A22 | AB     | RB11L                | 0.521                              |
| 1A22 | AB     | RB11M                | 1.000                              |
| 1A22 | AB     | RB172A               | 0.261                              |
| 1A22 | AB     | RB172A,NB173A        | 0.902                              |
| 1A22 | AB     | RB30A                | 0.568                              |
| 1A22 | AB     | SA51A                | 0.348                              |

|      |    |                                              |        |
|------|----|----------------------------------------------|--------|
| 1A22 | AB | SA62A                                        | 0.397  |
| 1A22 | AB | SB174A                                       | 0.034  |
| 1A22 | AB | SB57A                                        | -0.169 |
| 1A22 | AB | SB57A,SB61A                                  | -0.569 |
| 1A22 | AB | SB57A,SB61A,EB79A,KB80A                      | -0.895 |
| 1A22 | AB | SB57A,SB61A,EB79A,KB80A,QB121A,KB122A,VB126A | -1.399 |
| 1A22 | AB | SB61A                                        | 0.021  |
| 1A22 | AB | SB83A                                        | 0.226  |
| 1A22 | AB | TA164A                                       | 1.906  |
| 1A22 | AB | TA164S                                       | 1.690  |
| 1A22 | AB | TB60A                                        | 1.423  |
| 1A22 | AB | VB126A                                       | -0.670 |
| 1A22 | AB | WB124A                                       | 4.729  |
| 1A22 | AB | WB35A                                        | 0.545  |
| 1A22 | AB | WB63A                                        | 4.681  |
| 1A22 | AB | WB63F                                        | 2.783  |
| 1A22 | AB | YA153A                                       | 0.348  |
| 1A22 | AB | YA42A                                        | 0.199  |
| 1A22 | AB | YA42A,QA46A                                  | 0.289  |
| 1AK4 | AD | AD88G                                        | 2.654  |
| 1AK4 | AD | AD88V                                        | 0.769  |
| 1AK4 | AD | AD92G                                        | 0.581  |
| 1AK4 | AD | AD92V                                        | 0.359  |
| 1AK4 | AD | GD89A                                        | 2.076  |
| 1AK4 | AD | GD89V                                        | 3.029  |
| 1AK4 | AD | HD87A                                        | 1.009  |
| 1AK4 | AD | HD87Q                                        | 0.972  |
| 1AK4 | AD | HD87R                                        | 1.645  |
| 1AK4 | AD | ID91A                                        | 0.240  |
| 1AK4 | AD | ID91V                                        | 0.000  |
| 1AK4 | AD | PD85A                                        | 1.085  |
| 1AK4 | AD | PD90A                                        | 2.172  |
| 1AK4 | AD | PD90V                                        | 3.029  |
| 1AK4 | AD | PD93A                                        | 0.683  |
| 1AK4 | AD | VD86A                                        | 0.991  |
| 1B41 | AB | AB12S                                        | 0.707  |
| 1B41 | AB | HB29K                                        | -0.888 |
| 1B41 | AB | HB29R                                        | -0.409 |
| 1B41 | AB | KB32R                                        | 0.391  |
| 1B41 | AB | LB35W                                        | 1.304  |
| 1B41 | AB | MB33F                                        | 0.778  |
| 1B41 | AB | MB33L                                        | 1.811  |
| 1B41 | AB | MB33Q                                        | 1.595  |
| 1B41 | AB | MB33Y                                        | 0.707  |
| 1B41 | AB | NB47F                                        | -0.142 |
| 1B41 | AB | NB47R                                        | -0.030 |
| 1B41 | AB | NB47W                                        | 0.037  |
| 1B41 | AB | RB11K                                        | 0.625  |
| 1B41 | AB | RB27F                                        | 2.107  |
| 1B41 | AB | RB27M                                        | 1.483  |
| 1B41 | AB | RB27Y                                        | 2.395  |
| 1B41 | AB | TB8V                                         | 1.136  |
| 1B41 | AB | TB8V,TB9I                                    | 0.394  |
| 1B41 | AB | TB8V,TB9N                                    | 2.427  |
| 1B41 | AB | TB9I                                         | 0.025  |
| 1B41 | AB | TB9N                                         | 3.609  |
| 1B41 | AB | VB34T                                        | 1.214  |
| 1BP3 | AB | DA167A                                       | 0.068  |
| 1BP3 | AB | EA170A                                       | 1.831  |

|      |    |               |        |
|------|----|---------------|--------|
| 1BP3 | AB | EA65A         | 0.546  |
| 1BP3 | AB | FA172A        | 1.927  |
| 1BP3 | AB | HA18A         | 1.549  |
| 1BP3 | AB | HA21A         | 1.247  |
| 1BP3 | AB | IA175A        | 0.354  |
| 1BP3 | AB | IA175M        | -0.164 |
| 1BP3 | AB | KA164A        | 1.727  |
| 1BP3 | AB | KA164A,EA170A | 5.405  |
| 1BP3 | AB | KA168A        | 2.605  |
| 1BP3 | AB | KA168A,FA172A | 5.352  |
| 1BP3 | AB | NA63A         | 0.856  |
| 1BP3 | AB | QA68A         | 0.114  |
| 1BP3 | AB | RA163A        | 3.024  |
| 1BP3 | AB | RA174A        | 1.150  |
| 1BP3 | AB | RA179A        | 0.567  |
| 1BP3 | AB | RA64A         | 0.354  |
| 1BP3 | AB | RA64A,DA167A  | 0.378  |
| 1BP3 | AB | SA184A        | -0.297 |
| 1BP3 | AB | SA62A         | 1.415  |
| 1BP3 | AB | TA171S        | 0.494  |
| 1BP3 | AB | YA160A        | 0.445  |
| 1C1Y | AB | DA38A         | 2.619  |
| 1C1Y | AB | KB11A         | 1.108  |
| 1C1Y | AB | KB11E         | 0.891  |
| 1C1Y | AB | KB11M         | 0.713  |
| 1C1Y | AB | KB30A         | 1.312  |
| 1C1Y | AB | KB30A,RB35G   | 2.619  |
| 1C1Y | AB | KB30E         | 2.232  |
| 1C1Y | AB | NB10A         | 0.502  |
| 1C1Y | AB | NB10D         | 1.476  |
| 1C1Y | AB | QB12A         | 1.580  |
| 1C1Y | AB | RB13A         | 1.455  |
| 1C1Y | AB | RB35L         | 2.619  |
| 1C1Y | AB | RB5A          | 1.906  |
| 1C1Y | AB | RB5A,NB10D    | 2.751  |
| 1C1Y | AB | TB14A         | 1.455  |
| 1C1Y | AB | VB15A         | 1.123  |
| 1CSE | EI | LI38D         | 4.350  |
| 1CSE | EI | LI38E         | 2.350  |
| 1CSE | EI | LI38G         | 2.249  |
| 1CSE | EI | LI38I         | 2.941  |
| 1CSE | EI | LI38P         | 6.671  |
| 1CSE | EI | LI38S         | 1.172  |
| 1CSO | EI | III13L        | -4.419 |
| 1CT0 | EI | SI13L         | -4.100 |
| 1CT2 | EI | TI13L         | -3.160 |
| 1CT4 | EI | VI13L         | -2.992 |
| 1EFN | AB | IA12A         | 1.450  |
| 1EFN | AB | TA13H         | 1.243  |
| 1EMV | AB | CA21A         | 0.922  |
| 1EMV | AB | DA49A         | 5.915  |
| 1EMV | AB | EA28A         | 1.416  |
| 1EMV | AB | EA39A         | 2.083  |
| 1EMV | AB | FB86A         | 3.879  |
| 1EMV | AB | FB86A,LA31A   | 6.677  |
| 1EMV | AB | FB86A,VA32A   | 4.663  |
| 1EMV | AB | FB86A,VA35A   | 4.066  |
| 1EMV | AB | FB86A,YA52A   | 8.719  |
| 1EMV | AB | FB86A,YA53A   | 8.259  |



|      |    |        |        |
|------|----|--------|--------|
| 1EMV | AB | GA47A  | 1.485  |
| 1EMV | AB | IA51A  | 0.848  |
| 1EMV | AB | KB97A  | 1.960  |
| 1EMV | AB | LA31A  | 3.418  |
| 1EMV | AB | NA22A  | 0.139  |
| 1EMV | AB | NB72A  | 1.165  |
| 1EMV | AB | NB75A  | 2.334  |
| 1EMV | AB | PA45A  | 0.437  |
| 1EMV | AB | PA54A  | 1.242  |
| 1EMV | AB | QB92A  | -0.278 |
| 1EMV | AB | RB54A  | 1.666  |
| 1EMV | AB | SA26A  | 0.173  |
| 1EMV | AB | SA27A  | 0.956  |
| 1EMV | AB | SA46A  | 0.007  |
| 1EMV | AB | SA48A  | 2.187  |
| 1EMV | AB | SB74A  | -0.241 |
| 1EMV | AB | SB77A  | -0.233 |
| 1EMV | AB | SB78A  | -0.540 |
| 1EMV | AB | SB84A  | -0.109 |
| 1EMV | AB | TA25A  | 0.728  |
| 1EMV | AB | TA36A  | 0.900  |
| 1EMV | AB | TB87A  | 0.158  |
| 1EMV | AB | VA32A  | 2.578  |
| 1EMV | AB | VA35A  | 1.664  |
| 1EMV | AB | VB98A  | 1.089  |
| 1EMV | AB | YA52A  | 4.834  |
| 1EMV | AB | YA53A  | 4.634  |
| 1F47 | AB | DA4A   | 0.691  |
| 1F47 | AB | DA7A   | 1.733  |
| 1F47 | AB | DA7G   | 1.139  |
| 1F47 | AB | DA7S   | 2.064  |
| 1F47 | AB | FA11A  | 2.444  |
| 1F47 | AB | IA8A   | 2.515  |
| 1F47 | AB | LA12A  | 2.294  |
| 1F47 | AB | LA6A   | 0.925  |
| 1F47 | AB | QA15A  | -0.046 |
| 1F47 | AB | YA5A   | 0.869  |
| 1FFW | AB | AA102V | 1.363  |
| 1FFW | AB | AA89V  | 0.091  |
| 1FFW | AB | CB55A  | 0.204  |
| 1FFW | AB | DB49A  | 0.096  |
| 1FFW | AB | EB13A  | 0.716  |
| 1FFW | AB | EB20A  | 0.639  |
| 1FFW | AB | FB56A  | 3.644  |
| 1FFW | AB | HB23A  | 0.034  |
| 1FFW | AB | IB58A  | 0.428  |
| 1FFW | AB | YA105W | 0.713  |
| 1FSS | AB | AB12S  | 0.324  |
| 1FSS | AB | HB29K  | -0.619 |
| 1FSS | AB | HB29R  | -1.272 |
| 1FSS | AB | KB32R  | 1.135  |
| 1FSS | AB | LB35W  | 1.451  |
| 1FSS | AB | MB33F  | 0.937  |
| 1FSS | AB | MB33L  | 0.963  |
| 1FSS | AB | MB33Q  | 1.572  |
| 1FSS | AB | MB33Y  | 1.395  |
| 1FSS | AB | NB47F  | 0.493  |
| 1FSS | AB | NB47R  | -0.535 |
| 1FSS | AB | NB47W  | 0.116  |

|      |    |                       |        |
|------|----|-----------------------|--------|
| 1FSS | AB | RB11K                 | 0.317  |
| 1FSS | AB | RB27F                 | 2.435  |
| 1FSS | AB | RB27M                 | 2.663  |
| 1FSS | AB | RB27Y                 | 2.628  |
| 1FSS | AB | TB8V                  | -0.085 |
| 1FSS | AB | TB8V,TB9I             | 0.442  |
| 1FSS | AB | TB8V,TB9N             | 0.357  |
| 1FSS | AB | TB8V,TB9N,RB11K,HB29R | -0.392 |
| 1FSS | AB | TB9I                  | -0.232 |
| 1FSS | AB | TB9N                  | 1.250  |
| 1FSS | AB | VB34T                 | 1.585  |
| 1GC1 | GC | DC63A                 | -0.319 |
| 1GC1 | GC | EC85A                 | 1.323  |
| 1GC1 | GC | HC27A                 | 0.282  |
| 1GC1 | GC | KC29A                 | 0.536  |
| 1GC1 | GC | KC35A                 | 0.322  |
| 1GC1 | GC | KC46A                 | 1.430  |
| 1GC1 | GC | LC44A                 | 1.055  |
| 1GC1 | GC | NC32A                 | 0.183  |
| 1GC1 | GC | NC52A                 | 0.708  |
| 1GC1 | GC | QC25A                 | 0.032  |
| 1GC1 | GC | QC33A                 | 0.105  |
| 1GC1 | GC | QC40A                 | -0.410 |
| 1GC1 | GC | QC40A,DC63A           | -0.499 |
| 1GC1 | GC | QC64A                 | 0.442  |
| 1GC1 | GC | RC59A                 | 1.175  |
| 1GC1 | GC | SC42A                 | 0.000  |
| 1GC1 | GC | SC60A                 | -0.089 |
| 1GC1 | GC | TC45A                 | -0.149 |
| 1GUA | AB | EA37A                 | 1.300  |
| 1GUA | AB | KB10A                 | -0.400 |
| 1GUA | AB | KB29A                 | 1.998  |
| 1GUA | AB | KB32A                 | 0.799  |
| 1GUA | AB | NB9A                  | -0.400 |
| 1GUA | AB | QB11A                 | 0.100  |
| 1GUA | AB | RB4A                  | 1.000  |
| 1GUA | AB | RB4A,EA37A            | 1.300  |
| 1GUA | AB | SA39A                 | 1.400  |
| 1GUA | AB | TB13A                 | 0.701  |
| 1GUA | AB | VB14A                 | 0.100  |
| 1GUA | AB | VB14A,EA37A           | 1.700  |
| 1GUA | AB | VB33A                 | 0.200  |
| 1IAR | AB | EA9Q                  | 3.111  |
| 1IAR | AB | FA82A                 | -0.086 |
| 1IAR | AB | FA82D                 | -0.580 |
| 1IAR | AB | IA5A                  | 1.171  |
| 1IAR | AB | IA5R                  | 0.796  |
| 1IAR | AB | KA12E                 | 0.139  |
| 1IAR | AB | KA12S                 | -0.015 |
| 1IAR | AB | NA89A                 | 1.558  |
| 1IAR | AB | QA78A                 | 0.125  |
| 1IAR | AB | QA78E                 | 0.245  |
| 1IAR | AB | RA53Q                 | 0.835  |
| 1IAR | AB | RA81A                 | 0.479  |
| 1IAR | AB | RA81E                 | 1.461  |
| 1IAR | AB | RA85A                 | 0.427  |
| 1IAR | AB | RA85E                 | 1.224  |
| 1IAR | AB | RA88A                 | 3.753  |
| 1IAR | AB | RA88Q                 | 2.828  |

|      |    |               |        |
|------|----|---------------|--------|
| 1IAR | AB | TA13A         | 0.978  |
| 1IAR | AB | TA13D         | -0.219 |
| 1IAR | AB | TA6A          | -0.104 |
| 1IAR | AB | TA6D          | 1.392  |
| 1IAR | AB | WA91A         | 0.729  |
| 1IAR | AB | WA91D         | 1.306  |
| 1JCK | AB | FB176A        | 1.960  |
| 1JCK | AB | GB102A        | 0.013  |
| 1JCK | AB | KB103A        | 0.403  |
| 1JCK | AB | NB23A         | 2.076  |
| 1JCK | AB | NB60A         | 1.329  |
| 1JCK | AB | QB210A        | 2.076  |
| 1JCK | AB | TB20A         | 1.488  |
| 1JCK | AB | VB91A         | 2.081  |
| 1JCK | AB | YB26A         | 1.760  |
| 1JCK | AB | YB90A         | 2.335  |
| 1JTD | AB | DB14A         | 1.507  |
| 1JTD | AB | DB168A        | -1.061 |
| 1JTD | AB | DB93A         | 1.989  |
| 1JTD | AB | EA78A         | 0.835  |
| 1JTD | AB | EA84A         | 0.038  |
| 1JTD | AB | EB230A        | 1.849  |
| 1JTD | AB | FB171A        | 2.200  |
| 1JTD | AB | FB192A        | 3.960  |
| 1JTD | AB | FB36A         | 2.550  |
| 1JTD | AB | IB191A        | 2.889  |
| 1JTD | AB | KA85A         | 2.129  |
| 1JTD | AB | LA76A         | 1.721  |
| 1JTD | AB | LB53A         | 0.667  |
| 1JTD | AB | MA103A        | 2.504  |
| 1JTD | AB | MA244A        | 0.276  |
| 1JTD | AB | NA74A         | 0.795  |
| 1JTD | AB | NB12A         | 1.301  |
| 1JTD | AB | NB266A        | 2.669  |
| 1JTD | AB | NB74A         | 1.209  |
| 1JTD | AB | PA81A         | 1.721  |
| 1JTD | AB | QA73A         | 0.515  |
| 1JTD | AB | RB248A        | 0.888  |
| 1JTD | AB | SB131A        | 0.152  |
| 1JTD | AB | TB19A         | 0.295  |
| 1JTD | AB | VA190A        | 0.038  |
| 1JTD | AB | WB114A        | 3.255  |
| 1JTD | AB | WB15A         | 1.392  |
| 1JTD | AB | WB231A        | 5.809  |
| 1JTD | AB | YA79A         | 2.235  |
| 1JTD | AB | YB153A        | 3.298  |
| 1JTD | AB | YB170A        | 2.026  |
| 1JTD | AB | YB210A        | 0.824  |
| 1JTD | AB | YB35A         | 3.150  |
| 1JTD | AB | YB75A         | 0.480  |
| 1JTG | AB | DB163A        | -1.340 |
| 1JTG | AB | DB163K        | -1.982 |
| 1JTG | AB | DB49A         | 2.347  |
| 1JTG | AB | DB49A,KA208A  | 1.600  |
| 1JTG | AB | DB49A,RA217A  | 1.099  |
| 1JTG | AB | DB49A,SA105A  | 0.358  |
| 1JTG | AB | EA143A        | -0.073 |
| 1JTG | AB | EA143A,DB49A  | 1.504  |
| 1JTG | AB | EA143A,FB142A | 2.580  |

|      |    |                           |        |
|------|----|---------------------------|--------|
| 1JTG | AB | EA143A,KB74A              | 4.060  |
| 1JTG | AB | EA143A,RB160A             | 2.318  |
| 1JTG | AB | EA143A,WB112A             | 2.794  |
| 1JTG | AB | EA143A,WB150A             | 4.108  |
| 1JTG | AB | EA143A,WB162A             | 2.076  |
| 1JTG | AB | EA143G                    | -0.170 |
| 1JTG | AB | EA213K                    | -0.410 |
| 1JTG | AB | EA79A                     | 1.978  |
| 1JTG | AB | EA79A,EB73M               | 1.842  |
| 1JTG | AB | EA79A,EB73M,FB142A        | 2.854  |
| 1JTG | AB | EA79A,EB73M,KB74A         | 2.102  |
| 1JTG | AB | EA79A,EB73M,KB74A,FB142A  | 2.589  |
| 1JTG | AB | EA79A,SB113A              | 1.864  |
| 1JTG | AB | EA79A,SB113A,SB71A        | 2.580  |
| 1JTG | AB | EA79A,YA80A               | 1.026  |
| 1JTG | AB | EA79D                     | 3.654  |
| 1JTG | AB | EA79K                     | 3.239  |
| 1JTG | AB | EA79K,DB49A               | 5.638  |
| 1JTG | AB | EA79K,FB142A              | 4.552  |
| 1JTG | AB | EA85A                     | 1.377  |
| 1JTG | AB | EA85A,SB113A              | 4.563  |
| 1JTG | AB | EA85A,SB113A,SB71A        | 5.040  |
| 1JTG | AB | EA85A,SB71A               | 5.017  |
| 1JTG | AB | EA85A,YB50A               | 3.965  |
| 1JTG | AB | EA85G                     | -0.912 |
| 1JTG | AB | EA85G,EA143G              | -0.610 |
| 1JTG | AB | EA85V                     | -0.672 |
| 1JTG | AB | EA85V,EA143G              | -0.742 |
| 1JTG | AB | EB31A                     | 0.821  |
| 1JTG | AB | EB73A                     | 0.435  |
| 1JTG | AB | EB73A,YB50A               | -1.496 |
| 1JTG | AB | EB73M                     | 0.506  |
| 1JTG | AB | EB73M,FB142A              | 2.540  |
| 1JTG | AB | EB73M,KB74A               | 4.307  |
| 1JTG | AB | EB73M,KB74A,FB142A        | 4.569  |
| 1JTG | AB | FB142A                    | 2.804  |
| 1JTG | AB | FB142A,EA79A              | 2.747  |
| 1JTG | AB | FB142A,EA79A,YA80A        | 1.504  |
| 1JTG | AB | FB142A,KA208A             | 3.393  |
| 1JTG | AB | FB142A,RA217A             | 3.393  |
| 1JTG | AB | FB142A,SA105A             | 2.842  |
| 1JTG | AB | FB142A,YA80A              | 0.694  |
| 1JTG | AB | FB142A,YB143A             | 2.842  |
| 1JTG | AB | FB142A,YB143A,EA79A       | 2.890  |
| 1JTG | AB | FB142A,YB143A,EA79A,YA80A | 2.842  |
| 1JTG | AB | FB142A,YB143A,KA208A      | 4.680  |
| 1JTG | AB | FB142A,YB143A,RA217A      | 4.541  |
| 1JTG | AB | FB142A,YB143A,SA105A      | 4.156  |
| 1JTG | AB | FB142A,YB143A,YA80A       | 2.985  |
| 1JTG | AB | FB36A                     | 3.225  |
| 1JTG | AB | GA212S                    | -0.268 |
| 1JTG | AB | GA212S,DB49A              | 2.634  |
| 1JTG | AB | GA212S,FB142A             | 3.680  |
| 1JTG | AB | GB141A                    | 1.330  |
| 1JTG | AB | GB48A                     | 1.113  |
| 1JTG | AB | HB148A                    | 2.907  |
| 1JTG | AB | HB41A                     | 3.316  |
| 1JTG | AB | KA208A                    | 1.222  |
| 1JTG | AB | KA208A,DB49A              | 1.553  |

|      |    |                                   |        |
|------|----|-----------------------------------|--------|
| 1JTG | AB | KA208A,SA105A                     | 1.979  |
| 1JTG | AB | KA208A,SA105A,DB49A               | 1.318  |
| 1JTG | AB | KA208A,SA105A,RA217A              | 2.508  |
| 1JTG | AB | KA208A,SA105A,RA217A,DB49A        | 1.490  |
| 1JTG | AB | KA208A,SA209A,SA105A,RA217A       | 2.787  |
| 1JTG | AB | KA208A,SA209A,SA105A,RA217A,DB49A | 1.726  |
| 1JTG | AB | KA86A                             | -0.852 |
| 1JTG | AB | KA86N                             | 0.181  |
| 1JTG | AB | KB74A                             | 3.616  |
| 1JTG | AB | KB74A,EA79A                       | 1.576  |
| 1JTG | AB | KB74A,EA79A,YA80A                 | 1.385  |
| 1JTG | AB | KB74A,FB142A                      | 4.850  |
| 1JTG | AB | KB74A,FB142A,EA79A                | 3.129  |
| 1JTG | AB | KB74A,FB142A,EA79A,YA80A          | 3.129  |
| 1JTG | AB | KB74A,FB142A,KA208A               | 5.828  |
| 1JTG | AB | KB74A,FB142A,RA217A               | 5.494  |
| 1JTG | AB | KB74A,FB142A,SA105A               | 5.159  |
| 1JTG | AB | KB74A,FB142A,YA80A                | 4.777  |
| 1JTG | AB | KB74A,FB142A,YB143A               | 3.893  |
| 1JTG | AB | KB74A,FB142A,YB143A,EA79A         | 2.388  |
| 1JTG | AB | KB74A,FB142A,YB143A,EA79A,YA80A   | 2.412  |
| 1JTG | AB | KB74A,FB142A,YB143A,KA208A        | 5.470  |
| 1JTG | AB | KB74A,FB142A,YB143A,RA217A        | 5.255  |
| 1JTG | AB | KB74A,FB142A,YB143A,SA105A        | 5.064  |
| 1JTG | AB | KB74A,FB142A,YB143A,YA80A         | 4.227  |
| 1JTG | AB | KB74A,KA208A                      | 6.545  |
| 1JTG | AB | KB74A,RA217A                      | 6.617  |
| 1JTG | AB | KB74A,SA105A                      | 3.177  |
| 1JTG | AB | KB74A,YA80A                       | 3.321  |
| 1JTG | AB | KB74A,YB143A                      | 3.057  |
| 1JTG | AB | KB74A,YB143A,EA79A                | 1.050  |
| 1JTG | AB | KB74A,YB143A,EA79A,YA80A          | 1.767  |
| 1JTG | AB | KB74A,YB143A,KA208A               | 4.874  |
| 1JTG | AB | KB74A,YB143A,RA217A               | 4.371  |
| 1JTG | AB | KB74A,YB143A,SA105A               | 3.727  |
| 1JTG | AB | KB74A,YB143A,YA80A                | 3.393  |
| 1JTG | AB | LA77A                             | 0.864  |
| 1JTG | AB | MA104A                            | 1.119  |
| 1JTG | AB | MA104A,FB36A                      | 3.629  |
| 1JTG | AB | MA104A,SB113A,SB71A               | 1.672  |
| 1JTG | AB | MA104A,YB50A                      | 0.358  |
| 1JTG | AB | MA104A,YB53A                      | 3.607  |
| 1JTG | AB | MA244A                            | -0.051 |
| 1JTG | AB | NA75A                             | -0.962 |
| 1JTG | AB | NA75A,DB49A                       | 1.576  |
| 1JTG | AB | NA75A,FB142A                      | 2.292  |
| 1JTG | AB | NA75A,HB148A                      | 2.102  |
| 1JTG | AB | NA75A,KB74A                       | 3.510  |
| 1JTG | AB | NA75A,RB160A                      | 1.576  |
| 1JTG | AB | NA75A,WB112A                      | 2.794  |
| 1JTG | AB | NA75A,WB150A                      | 4.347  |
| 1JTG | AB | NA75A,WB162A                      | 2.102  |
| 1JTG | AB | PA82A                             | -0.074 |
| 1JTG | AB | PA82A,HB41A                       | 2.652  |
| 1JTG | AB | PA82A,YB50A                       | -0.647 |
| 1JTG | AB | PA82A,YB53A                       | 2.388  |
| 1JTG | AB | PA82Q                             | 0.461  |
| 1JTG | AB | QA74A                             | 0.507  |
| 1JTG | AB | QA74A,DB49A                       | 2.197  |

|      |    |                            |        |
|------|----|----------------------------|--------|
| 1JTG | AB | QA74A,FB142A               | 2.818  |
| 1JTG | AB | QA74A,HB148A               | 3.200  |
| 1JTG | AB | QA74A,KB74A                | 4.108  |
| 1JTG | AB | QA74A,RB160A               | 3.749  |
| 1JTG | AB | QA74A,WB112A               | 3.536  |
| 1JTG | AB | QA74A,WB150A               | 3.822  |
| 1JTG | AB | QA74A,WB162A               | 2.890  |
| 1JTG | AB | RA214Y                     | -0.143 |
| 1JTG | AB | RA217A                     | 1.302  |
| 1JTG | AB | RA217A,DB49A               | 1.111  |
| 1JTG | AB | RA217A,KA208A              | 2.729  |
| 1JTG | AB | RA217A,KA208A,DB49A        | 1.903  |
| 1JTG | AB | RA217A,SA105A              | 1.849  |
| 1JTG | AB | RA217A,SA105A,DB49A        | 1.254  |
| 1JTG | AB | RA217A,SA209A              | 0.739  |
| 1JTG | AB | RA217A,SA209A,DB49A        | 0.408  |
| 1JTG | AB | RA217A,SA209A,KA208A       | 2.716  |
| 1JTG | AB | RA217A,SA209A,KA208A,DB49A | 2.031  |
| 1JTG | AB | RA217A,SA209A,SA105A       | 1.687  |
| 1JTG | AB | RA217A,SA209A,SA105A,DB49A | 0.894  |
| 1JTG | AB | RB144A                     | 0.655  |
| 1JTG | AB | RB160A                     | 2.736  |
| 1JTG | AB | SA105A                     | 0.563  |
| 1JTG | AB | SA105A,DB49A               | 1.384  |
| 1JTG | AB | SA209A                     | 1.238  |
| 1JTG | AB | SA209A,DB49A               | 1.640  |
| 1JTG | AB | SA209A,KA208A              | 2.093  |
| 1JTG | AB | SA209A,KA208A,DB49A        | 1.534  |
| 1JTG | AB | SA209A,SA105A              | 1.152  |
| 1JTG | AB | SA209A,SA105A,DB49A        | 1.094  |
| 1JTG | AB | SA209A,SA105A,KA208A       | 1.849  |
| 1JTG | AB | SA209A,SA105A,KA208A,DB49A | 0.609  |
| 1JTG | AB | SB113A                     | -0.516 |
| 1JTG | AB | SB35A                      | 0.000  |
| 1JTG | AB | SB39A                      | 0.022  |
| 1JTG | AB | SB71A                      | 0.139  |
| 1JTG | AB | SB71A,SB113A               | 0.456  |
| 1JTG | AB | TB140K                     | -0.014 |
| 1JTG | AB | VA190A                     | -0.493 |
| 1JTG | AB | VA190A,FB142A              | 2.197  |
| 1JTG | AB | VA190A,YB50A               | -0.885 |
| 1JTG | AB | VA78A                      | 1.910  |
| 1JTG | AB | VA78A,FB142A               | 4.514  |
| 1JTG | AB | VA78A,RB160A               | 4.347  |
| 1JTG | AB | VA78A,WB162A               | 4.227  |
| 1JTG | AB | WB112A                     | 2.879  |
| 1JTG | AB | WB150A                     | 4.314  |
| 1JTG | AB | WB162A                     | 2.262  |
| 1JTG | AB | YA80A                      | -0.131 |
| 1JTG | AB | YB143A                     | 0.710  |
| 1JTG | AB | YB143A,EA79A               | 1.864  |
| 1JTG | AB | YB143A,EA79A,YA80A         | 2.054  |
| 1JTG | AB | YB143A,KA208A              | 2.555  |
| 1JTG | AB | YB143A,RA217A              | 2.269  |
| 1JTG | AB | YB143A,SA105A              | 1.791  |
| 1JTG | AB | YB143A,YA80A               | 1.075  |
| 1JTG | AB | YB50A                      | -1.707 |
| 1JTG | AB | YB51A                      | 0.799  |
| 1JTG | AB | YB53A                      | 2.869  |

|      |    |                     |        |
|------|----|---------------------|--------|
| 1KAC | AB | PA15S               | -0.793 |
| 1KTZ | AB | DB8A                | 1.521  |
| 1KTZ | AB | DB8N                | 1.999  |
| 1KTZ | AB | EB31A               | 1.216  |
| 1KTZ | AB | EB95A               | 1.494  |
| 1KTZ | AB | EB95Q               | 1.626  |
| 1KTZ | AB | FB6A                | 2.979  |
| 1KTZ | AB | IB26A               | 1.896  |
| 1KTZ | AB | IB29A               | 1.370  |
| 1KTZ | AB | LB3A                | 1.824  |
| 1KTZ | AB | RA13A               | 1.481  |
| 1KTZ | AB | RA13K               | 1.151  |
| 1KTZ | AB | RA64A               | 2.883  |
| 1KTZ | AB | RA64K               | 2.200  |
| 1KTZ | AB | SB25A               | 0.326  |
| 1KTZ | AB | SB28A               | 0.216  |
| 1KTZ | AB | SB28L               | 4.036  |
| 1KTZ | AB | TB27A               | 1.513  |
| 1KTZ | AB | VA62I               | 0.243  |
| 1KTZ | AB | VB53A               | 0.415  |
| 1M9E | AD | AD76H               | -1.009 |
| 1MAH | AF | WA276R              | 8.809  |
| 1MAH | AF | YA121Q              | 3.004  |
| 1MAH | AF | YA121Q,WA276R       | 9.706  |
| 1MAH | AF | YA69N               | 5.217  |
| 1MAH | AF | YA69N,WA276R        | 11.629 |
| 1MAH | AF | YA69N,YA121Q        | 6.644  |
| 1MAH | AF | YA69N,YA121Q,WA276R | 11.837 |
| 1OHZ | AB | SB45A,TB46A         | 0.090  |
| 1P69 | AB | SA15P               | 0.793  |
| 1P6A | AB | YA87S               | 1.252  |
| 1R0R | EI | AI10C               | -0.477 |
| 1R0R | EI | AI10D               | 5.156  |
| 1R0R | EI | AI10D,LI13A         | 5.454  |
| 1R0R | EI | AI10D,LI13A,YI15D   | 8.820  |
| 1R0R | EI | AI10E               | 4.514  |
| 1R0R | EI | AI10F               | -2.212 |
| 1R0R | EI | AI10G               | 1.096  |
| 1R0R | EI | AI10H               | 1.750  |
| 1R0R | EI | AI10I               | -1.774 |
| 1R0R | EI | AI10K               | 3.030  |
| 1R0R | EI | AI10L               | -1.731 |
| 1R0R | EI | AI10M               | -1.715 |
| 1R0R | EI | AI10N               | 2.060  |
| 1R0R | EI | AI10P               | 3.299  |
| 1R0R | EI | AI10Q               | 1.786  |
| 1R0R | EI | AI10R               | 5.454  |
| 1R0R | EI | AI10R,LI13R         | 7.630  |
| 1R0R | EI | AI10R,TI12K,LI13R   | 9.171  |
| 1R0R | EI | AI10S               | 1.717  |
| 1R0R | EI | AI10T               | 1.250  |
| 1R0R | EI | AI10T,LI13M         | 0.255  |
| 1R0R | EI | AI10V               | -0.956 |
| 1R0R | EI | AI10V,TI12S         | 0.093  |
| 1R0R | EI | AI10Y               | -0.827 |
| 1R0R | EI | EI14A               | 2.060  |
| 1R0R | EI | EI14C               | 2.339  |
| 1R0R | EI | EI14D               | 0.255  |
| 1R0R | EI | EI14F               | 3.568  |

|      |    |                                   |        |
|------|----|-----------------------------------|--------|
| 1R0R | EI | EI14G                             | 2.674  |
| 1R0R | EI | EI14H                             | 1.685  |
| 1R0R | EI | EI14I                             | 0.727  |
| 1R0R | EI | EI14K                             | 2.674  |
| 1R0R | EI | EI14L                             | 0.562  |
| 1R0R | EI | EI14M                             | 1.549  |
| 1R0R | EI | EI14N                             | 2.089  |
| 1R0R | EI | EI14P                             | 3.712  |
| 1R0R | EI | EI14Q                             | 1.264  |
| 1R0R | EI | EI14R                             | 2.060  |
| 1R0R | EI | EI14S                             | 3.131  |
| 1R0R | EI | EI14T                             | 4.193  |
| 1R0R | EI | EI14V                             | 0.093  |
| 1R0R | EI | EI14W                             | 1.824  |
| 1R0R | EI | EI14Y                             | 1.864  |
| 1R0R | EI | KI8A                              | -0.602 |
| 1R0R | EI | KI8C                              | -0.607 |
| 1R0R | EI | KI8D                              | -0.585 |
| 1R0R | EI | KI8E                              | -0.109 |
| 1R0R | EI | KI8F                              | -0.783 |
| 1R0R | EI | KI8G                              | -0.827 |
| 1R0R | EI | KI8H                              | -0.585 |
| 1R0R | EI | KI8I                              | 1.108  |
| 1R0R | EI | KI8L                              | -0.323 |
| 1R0R | EI | KI8M                              | -0.553 |
| 1R0R | EI | KI8N                              | -0.385 |
| 1R0R | EI | KI8P                              | 1.329  |
| 1R0R | EI | KI8Q                              | -0.523 |
| 1R0R | EI | KI8R                              | 0.134  |
| 1R0R | EI | KI8S                              | -0.303 |
| 1R0R | EI | KI8S,PI9D,AI10Y                   | -1.909 |
| 1R0R | EI | KI8S,PI9D,AI10Y,LI13G,EI14I,RI16K | 0.790  |
| 1R0R | EI | KI8T                              | 0.877  |
| 1R0R | EI | KI8T,PI9E,AI10Y                   | -0.864 |
| 1R0R | EI | KI8V                              | 0.405  |
| 1R0R | EI | KI8W                              | -1.090 |
| 1R0R | EI | KI8Y                              | -0.686 |
| 1R0R | EI | LI13A                             | 0.414  |
| 1R0R | EI | LI13C                             | -1.328 |
| 1R0R | EI | LI13D                             | 4.476  |
| 1R0R | EI | LI13E                             | 2.120  |
| 1R0R | EI | LI13F                             | 0.608  |
| 1R0R | EI | LI13G                             | 2.320  |
| 1R0R | EI | LI13H                             | 0.562  |
| 1R0R | EI | LI13I                             | 3.209  |
| 1R0R | EI | LI13K                             | 3.051  |
| 1R0R | EI | LI13M                             | -0.509 |
| 1R0R | EI | LI13M,YI15Q                       | 3.589  |
| 1R0R | EI | LI13N                             | 1.480  |
| 1R0R | EI | LI13P                             | 7.581  |
| 1R0R | EI | LI13Q                             | 0.585  |
| 1R0R | EI | LI13R                             | 2.895  |
| 1R0R | EI | LI13S                             | 1.549  |
| 1R0R | EI | LI13T                             | 0.158  |
| 1R0R | EI | LI13V                             | 2.127  |
| 1R0R | EI | LI13W                             | 1.503  |
| 1R0R | EI | LI13Y                             | 0.441  |
| 1R0R | EI | PI9A                              | -0.630 |
| 1R0R | EI | PI9C                              | -0.973 |



|      |    |                           |        |
|------|----|---------------------------|--------|
| 1R0R | EI | PI9D                      | -2.486 |
| 1R0R | EI | PI9E                      | -2.212 |
| 1R0R | EI | PI9F                      | 1.363  |
| 1R0R | EI | PI9G                      | -0.341 |
| 1R0R | EI | PI9H                      | -0.214 |
| 1R0R | EI | PI9I                      | 1.717  |
| 1R0R | EI | PI9K                      | 0.340  |
| 1R0R | EI | PI9L                      | 1.168  |
| 1R0R | EI | PI9M                      | -0.033 |
| 1R0R | EI | PI9N                      | -0.905 |
| 1R0R | EI | PI9Q                      | -1.395 |
| 1R0R | EI | PI9R                      | 1.087  |
| 1R0R | EI | PI9S                      | 0.134  |
| 1R0R | EI | PI9S, AI10L, TI12K, LI13R | 4.825  |
| 1R0R | EI | PI9T                      | 1.181  |
| 1R0R | EI | PI9V                      | 1.312  |
| 1R0R | EI | PI9W                      | 0.479  |
| 1R0R | EI | PI9Y                      | 0.846  |
| 1R0R | EI | RI16A                     | -0.095 |
| 1R0R | EI | RI16C                     | 0.113  |
| 1R0R | EI | RI16D                     | -0.177 |
| 1R0R | EI | RI16E                     | 0.340  |
| 1R0R | EI | RI16F                     | 0.441  |
| 1R0R | EI | RI16G                     | 2.060  |
| 1R0R | EI | RI16H                     | 0.518  |
| 1R0R | EI | RI16I                     | 0.204  |
| 1R0R | EI | RI16K                     | -0.095 |
| 1R0R | EI | RI16L                     | 0.229  |
| 1R0R | EI | RI16M                     | 0.441  |
| 1R0R | EI | RI16N                     | -0.050 |
| 1R0R | EI | RI16P                     | 7.288  |
| 1R0R | EI | RI16Q                     | 0.180  |
| 1R0R | EI | RI16S                     | -0.016 |
| 1R0R | EI | RI16T                     | 0.340  |
| 1R0R | EI | RI16V                     | 0.113  |
| 1R0R | EI | RI16W                     | 0.932  |
| 1R0R | EI | RI16Y                     | 0.812  |
| 1R0R | EI | TI12A                     | 0.967  |
| 1R0R | EI | TI12C                     | 0.802  |
| 1R0R | EI | TI12D                     | 2.848  |
| 1R0R | EI | TI12E                     | 2.976  |
| 1R0R | EI | TI12F                     | -0.065 |
| 1R0R | EI | TI12G                     | 3.095  |
| 1R0R | EI | TI12H                     | 0.518  |
| 1R0R | EI | TI12I                     | 0.255  |
| 1R0R | EI | TI12K                     | 1.907  |
| 1R0R | EI | TI12K, LI13R              | 5.186  |
| 1R0R | EI | TI12L                     | 0.659  |
| 1R0R | EI | TI12M                     | 1.312  |
| 1R0R | EI | TI12N                     | 0.018  |
| 1R0R | EI | TI12P                     | 4.881  |
| 1R0R | EI | TI12Q                     | 2.191  |
| 1R0R | EI | TI12R                     | 3.299  |
| 1R0R | EI | TI12R, LI13R              | 6.405  |
| 1R0R | EI | TI12S                     | 0.847  |
| 1R0R | EI | TI12V                     | 0.994  |
| 1R0R | EI | TI12W                     | 2.895  |
| 1R0R | EI | TI12Y                     | -0.867 |
| 1R0R | EI | YI15A                     | 5.398  |

|      |    |                   |        |
|------|----|-------------------|--------|
| 1R0R | EI | YI15C             | 3.209  |
| 1R0R | EI | YI15D             | 5.544  |
| 1R0R | EI | YI15E             | 4.554  |
| 1R0R | EI | YI15F             | 0.608  |
| 1R0R | EI | YI15G             | 6.313  |
| 1R0R | EI | YI15H             | 3.212  |
| 1R0R | EI | YI15I             | 2.825  |
| 1R0R | EI | YI15K             | 5.436  |
| 1R0R | EI | YI15L             | 2.539  |
| 1R0R | EI | YI15M             | 3.095  |
| 1R0R | EI | YI15N             | 5.538  |
| 1R0R | EI | YI15P             | 6.562  |
| 1R0R | EI | YI15Q             | 4.440  |
| 1R0R | EI | YI15R             | 4.408  |
| 1R0R | EI | YI15S             | 5.091  |
| 1R0R | EI | YI15T             | 5.398  |
| 1R0R | EI | YI15V             | 3.461  |
| 1R0R | EI | YI15W             | -0.359 |
| 1S0W | AC | AC142F            | -2.102 |
| 1SBB | AB | LB20T             | -0.100 |
| 1SBB | AB | LB20T,VB26Y,YB91V | 0.132  |
| 1SBB | AB | VB26Y             | -1.181 |
| 1SBB | AB | YB91V             | 0.085  |
| 1SBN | EI | RI38K             | -0.310 |
| 1SGD | EI | DI13L             | -5.590 |
| 1SGE | EI | EI13L             | -5.899 |
| 1SGN | EI | NI13L             | -3.352 |
| 1SGP | EI | AI13L             | -2.948 |
| 1SGQ | EI | GI13L             | -4.934 |
| 1SGY | EI | YI13L             | -1.653 |
| 1TM1 | EI | EI41A             | 2.988  |
| 1TM1 | EI | EI41S             | 2.746  |
| 1TM1 | EI | EI41S,MI40R       | 3.548  |
| 1TM1 | EI | MI40A             | 1.027  |
| 1TM1 | EI | MI40F             | 1.027  |
| 1TM1 | EI | MI40G             | 2.232  |
| 1TM1 | EI | MI40K             | 1.093  |
| 1TM1 | EI | MI40Y             | 0.056  |
| 1TM1 | EI | RI43A             | 1.256  |
| 1TM1 | EI | TI39A             | 2.649  |
| 1TM1 | EI | TI39A,EI41A       | 3.389  |
| 1TM1 | EI | TI39D             | 2.098  |
| 1TM1 | EI | TI39D,EI41A       | 0.754  |
| 1TM1 | EI | TI39P             | 3.754  |
| 1TM1 | EI | YI42A             | 2.579  |
| 1TM1 | EI | YI42G             | 4.679  |
| 1TM3 | EI | KI40M             | -1.093 |
| 1TM4 | EI | GI40M             | -2.232 |
| 1TM5 | EI | AI40M             | -1.027 |
| 1TM7 | EI | YI40M             | -0.056 |
| 1TMG | EI | FI40M             | -1.027 |
| 1TO1 | EI | AI42Y             | -2.980 |
| 1Y1K | EI | AI39T             | -2.727 |
| 1Y33 | EI | PI39T             | -3.754 |
| 1Y34 | EI | AI41E             | -3.053 |
| 1Y3B | EI | SI41E             | -2.746 |
| 1Y4A | EI | SI40E,RI39M       | -3.548 |
| 2A9K | AB | EB65A             | 3.151  |
| 2A9K | AB | GB55D             | 2.410  |

|      |    |                          |        |
|------|----|--------------------------|--------|
| 2AJF | AE | DA20A                    | 0.585  |
| 2AJF | AE | NE151K                   | 2.012  |
| 2AJF | AE | TE159S                   | 1.823  |
| 2AJF | AE | YA23A                    | 1.452  |
| 2AJF | AE | YA23F                    | 1.397  |
| 2B0Z | AB | IB87F                    | -2.528 |
| 2B10 | AB | SB87F                    | -1.164 |
| 2B11 | AB | WB87F                    | -0.754 |
| 2B42 | AB | HA357A                   | 1.621  |
| 2B42 | AB | HA357Q                   | 1.065  |
| 2BTF | AP | FP59A                    | 1.595  |
| 2BTF | AP | GP120F                   | 1.720  |
| 2BTF | AP | KP125A                   | 0.460  |
| 2BTF | AP | VP60E                    | 0.978  |
| 2DVW | AB | DA37A,DA69A              | 0.192  |
| 2DVW | AB | EA180A                   | 0.438  |
| 2DVW | AB | EB21A,EB22A              | 0.038  |
| 2DVW | AB | KA114A                   | 0.034  |
| 2DVW | AB | KB62E                    | 0.205  |
| 2DVW | AB | RA39A                    | 0.910  |
| 2DVW | AB | RA39A,KA114A             | 2.361  |
| 2DVW | AB | RB3A,RB4A,RB7A           | 2.789  |
| 2DVW | AB | RB3A,RB7A                | 2.152  |
| 2DVW | AB | RB7A                     | 0.693  |
| 2G2U | AB | DA79A                    | -1.548 |
| 2G2U | AB | DA79A,EB73M              | -2.153 |
| 2G2U | AB | DA79A,EB73M,FB142A       | -0.694 |
| 2G2U | AB | DA79A,EB73M,KB74A        | -1.561 |
| 2G2U | AB | DA79A,EB73M,KB74A,FB142A | -0.990 |
| 2G2U | AB | DA79E                    | -4.397 |
| 2G2U | AB | DA79K                    | -0.563 |
| 2G2U | AB | EB31A                    | 0.651  |
| 2G2U | AB | EB73A                    | -1.978 |
| 2G2U | AB | EB73A,YB143A             | -1.835 |
| 2G2U | AB | EB73A,YB50A              | -2.451 |
| 2G2U | AB | EB73M                    | -3.004 |
| 2G2U | AB | EB73M,FB142A             | 0.323  |
| 2G2U | AB | EB73M,FB142W,YB143F      | -1.108 |
| 2G2U | AB | EB73M,KB74A              | 0.474  |
| 2G2U | AB | EB73M,KB74A,FB142A       | 1.487  |
| 2G2U | AB | EB73M,YB143F             | -1.592 |
| 2G2U | AB | FB142A                   | 0.276  |
| 2G2U | AB | FB36A                    | 2.763  |
| 2G2U | AB | GB141A                   | -0.414 |
| 2G2U | AB | GB48A                    | -0.426 |
| 2G2U | AB | HB148A                   | 1.118  |
| 2G2U | AB | HB41A                    | 1.716  |
| 2G2U | AB | KB74A                    | -0.217 |
| 2G2U | AB | RB144A                   | -0.342 |
| 2G2U | AB | RB160A                   | 0.669  |
| 2G2U | AB | SB113A                   | -0.612 |
| 2G2U | AB | SB35A                    | -0.950 |
| 2G2U | AB | SB39A                    | -0.956 |
| 2G2U | AB | SB71A                    | -0.512 |
| 2G2U | AB | WB112A                   | 0.958  |
| 2G2U | AB | WB112A,YB143A            | -0.409 |
| 2G2U | AB | WB150A                   | 1.784  |
| 2G2U | AB | WB150A,YB143A            | 0.989  |
| 2G2U | AB | WB162A                   | 0.531  |

|      |    |                 |        |
|------|----|-----------------|--------|
| 2G2U | AB | YB143A          | -1.846 |
| 2G2U | AB | YB50A           | -2.075 |
| 2G2U | AB | YB50A,YB143A    | -2.075 |
| 2G2U | AB | YB51A           | -0.628 |
| 2G2U | AB | YB53A           | 2.301  |
| 2G2W | AB | KA79D           | 0.453  |
| 2GOX | AB | NB38A           | 1.451  |
| 2GOX | AB | RB31A           | 1.883  |
| 2HLE | AB | KA141Q          | -0.410 |
| 2HLE | AB | LA87R           | 2.286  |
| 2J0T | AD | CD70S           | 4.408  |
| 2J0T | AD | MD66A           | 1.680  |
| 2J0T | AD | SD68A           | 2.105  |
| 2J0T | AD | SD68E           | 2.184  |
| 2J0T | AD | SD68R           | 2.835  |
| 2J0T | AD | SD68Y           | 2.977  |
| 2J0T | AD | TD2A            | 4.388  |
| 2J0T | AD | TD2L            | 2.681  |
| 2J0T | AD | TD2L,VD4S       | 3.469  |
| 2J0T | AD | TD2R            | 5.043  |
| 2J0T | AD | TD2S            | 1.594  |
| 2J0T | AD | TD2S,VD4A       | 1.250  |
| 2J0T | AD | TD2S,VD4A,SD68Y | 2.146  |
| 2J0T | AD | VD4A            | 0.000  |
| 2J0T | AD | VD4I            | 1.642  |
| 2J0T | AD | VD4K            | 1.824  |
| 2J0T | AD | VD4S            | 0.982  |
| 2J0T | AD | VD69I           | 0.809  |
| 2J0T | AD | VD69T           | 1.318  |
| 2J1K | CT | GC10D           | 0.184  |
| 2J1K | CT | RC24A           | 0.764  |
| 2NOJ | AB | RB24A,NB31A     | 0.748  |
| 2NU0 | EI | WI13L           | -1.839 |
| 2NU1 | EI | HI13L           | -1.690 |
| 2NU2 | EI | RI13L           | -3.320 |
| 2NU4 | EI | KI13L           | -3.138 |
| 2PCB | AB | DA34N           | 0.821  |
| 2PCB | AB | EA290N          | 0.871  |
| 2PCB | AB | EA32Q           | 0.605  |
| 2PCB | AB | EA35Q           | 0.676  |
| 2PCC | AB | AB86G           | 1.901  |
| 2PCC | AB | AB86G,DA34A     | -0.098 |
| 2PCC | AB | AB86G,VA197A    | 2.102  |
| 2PCC | AB | DA34A           | -0.897 |
| 2PCC | AB | EA290A          | 6.199  |
| 2PCC | AB | KB77A           | 0.304  |
| 2PCC | AB | KB77A,EA290A    | 1.102  |
| 2PCC | AB | KB77A,VA197A    | 2.800  |
| 2PCC | AB | KB92A           | 0.901  |
| 2PCC | AB | KB92A,DA34A     | 0.203  |
| 2PCC | AB | KB92A,VA197A    | 1.501  |
| 2PCC | AB | VA197A          | 2.102  |
| 2REX | AB | LA70Y           | 0.557  |
| 2REX | AB | YB97F           | 0.000  |
| 2SGP | EI | PI13L           | -8.328 |
| 2SGQ | EI | QI13L           | -2.567 |
| 2SIC | EI | MI67A           | 0.218  |
| 2SIC | EI | MI67D           | 0.751  |
| 2SIC | EI | MI67E           | 0.796  |

|      |    |                   |        |
|------|----|-------------------|--------|
| 2SIC | EI | MI67G             | 0.145  |
| 2SIC | EI | MI67H             | 0.218  |
| 2SIC | EI | MI67I             | 1.604  |
| 2SIC | EI | MI67K             | 0.000  |
| 2SIC | EI | MI67L             | -0.240 |
| 2SIC | EI | MI67R             | 0.000  |
| 2SIC | EI | MI67V             | 0.713  |
| 2VLN | AB | AB75N             | -2.334 |
| 2VLQ | AB | AB86F             | -3.879 |
| 2VN5 | AB | AB14S,LB15T       | 1.318  |
| 2WPT | AB | DA30A             | -0.776 |
| 2WPT | AB | DA30A,FB79A       | -0.165 |
| 2WPT | AB | DA30L             | -3.402 |
| 2WPT | AB | DA30L,NA31V,RA35T | -6.333 |
| 2WPT | AB | DA48A             | 5.214  |
| 2WPT | AB | EA27A             | 1.733  |
| 2WPT | AB | EA38A             | 4.501  |
| 2WPT | AB | FB79A             | 1.594  |
| 2WPT | AB | FB79A,DA30A       | -0.132 |
| 2WPT | AB | FB79A,NA31A       | 1.352  |
| 2WPT | AB | FB79A,VA34A       | 3.111  |
| 2WPT | AB | KB90A             | 0.649  |
| 2WPT | AB | NA31A             | -0.259 |
| 2WPT | AB | NA31V             | -0.897 |
| 2WPT | AB | NA31V,RA35T       | -2.587 |
| 2WPT | AB | NB65A             | 0.701  |
| 2WPT | AB | NB68A             | 1.251  |
| 2WPT | AB | PA53A             | 2.926  |
| 2WPT | AB | QB85A             | 0.384  |
| 2WPT | AB | RA35A             | -1.110 |
| 2WPT | AB | RA35T             | -1.038 |
| 2WPT | AB | RB47A             | 0.872  |
| 2WPT | AB | SA47A             | 2.424  |
| 2WPT | AB | SB67A             | -0.134 |
| 2WPT | AB | SB70A             | -0.457 |
| 2WPT | AB | SB71A             | -0.095 |
| 2WPT | AB | SB77A             | -0.074 |
| 2WPT | AB | SB77A,NA31A       | -0.437 |
| 2WPT | AB | TB80A             | 0.377  |
| 2WPT | AB | VA34A             | 3.807  |
| 2WPT | AB | YA51A             | 5.214  |
| 2WPT | AB | YA52A             | 5.214  |
| 3BK3 | AC | AC37R             | 1.382  |
| 3BK3 | AC | IC19A             | 0.486  |
| 3BK3 | AC | IC19R             | 0.424  |
| 3BK3 | AC | IC22A             | 1.307  |
| 3BK3 | AC | IC22R             | 2.120  |
| 3BK3 | AC | IC28A             | 1.261  |
| 3BK3 | AC | IC28R             | 1.175  |
| 3BK3 | AC | IC3A              | 1.038  |
| 3BK3 | AC | IC3R              | 0.651  |
| 3BK3 | AC | LC2A              | 0.000  |
| 3BK3 | AC | LC2R              | 0.026  |
| 3BK3 | AC | TC4P              | 0.486  |
| 3BK3 | AC | TC6P              | 1.742  |
| 3BP8 | AC | AC51F             | 0.615  |
| 3BP8 | AC | FA115A            | 0.709  |
| 3BP8 | AC | FA115A,AC51F      | -0.774 |
| 3BT1 | AU | AU253S            | 0.201  |

|      |    |        |        |
|------|----|--------|--------|
| 3BT1 | AU | DU11A  | -0.026 |
| 3BT1 | AU | DU138A | 1.274  |
| 3BT1 | AU | DU139A | 1.030  |
| 3BT1 | AU | DU252A | 0.060  |
| 3BT1 | AU | EU33A  | 0.371  |
| 3BT1 | AU | EU36A  | 0.093  |
| 3BT1 | AU | EU42A  | -0.193 |
| 3BT1 | AU | EU68A  | 0.049  |
| 3BT1 | AU | GU10A  | 0.261  |
| 3BT1 | AU | HU164A | 1.011  |
| 3BT1 | AU | KU137A | 0.641  |
| 3BT1 | AU | KU50A  | 0.631  |
| 3BT1 | AU | KU62A  | 0.410  |
| 3BT1 | AU | LU142A | 0.711  |
| 3BT1 | AU | LU148A | 1.634  |
| 3BT1 | AU | LU166A | 0.733  |
| 3BT1 | AU | LU31A  | 0.307  |
| 3BT1 | AU | LU38A  | 0.513  |
| 3BT1 | AU | LU40A  | 0.856  |
| 3BT1 | AU | LU55A  | 1.092  |
| 3BT1 | AU | LU66A  | 1.353  |
| 3BT1 | AU | NU9A   | 0.300  |
| 3BT1 | AU | PU136A | 0.329  |
| 3BT1 | AU | PU149A | 0.587  |
| 3BT1 | AU | RU25A  | 0.999  |
| 3BT1 | AU | RU53A  | 0.873  |
| 3BT1 | AU | SU99A  | 0.292  |
| 3BT1 | AU | TU125A | 0.986  |
| 3BT1 | AU | TU27A  | 0.895  |
| 3BT1 | AU | TU54A  | 0.384  |
| 3BT1 | AU | TU64A  | 0.648  |
| 3BT1 | AU | TU67A  | 0.183  |
| 3BT1 | AU | TU8A   | 0.174  |
| 3BT1 | AU | VU124A | 0.733  |
| 3BT1 | AU | VU29A  | 0.704  |
| 3BT1 | AU | YU57A  | 1.180  |
| 3BX1 | AC | AC86T  | 1.836  |
| 3BX1 | AC | FC84V  | 0.410  |
| 3BX1 | AC | RC85G  | 0.355  |
| 3BX1 | AC | TC88V  | 2.837  |
| 3BX1 | AC | TC89A  | 0.170  |
| 3BX1 | AC | YC87A  | 1.298  |
| 3BX1 | AC | YC87I  | 1.781  |
| 3D5R | AC | AC38N  | -1.451 |
| 3D5S | AC | AC31R  | -1.883 |
| 3FIS | AB | DA200A | 0.554  |
| 3FIS | AB | DA255A | 3.759  |
| 3FIS | AB | DA36A  | 2.184  |
| 3FIS | AB | KA201A | -2.079 |
| 3FIS | AB | KA201C | -1.694 |
| 3FIS | AB | MA33A  | 1.238  |
| 3FIS | AB | YA202A | 2.995  |
| 3KBH | AE | SE54A  | 1.856  |
| 3KBH | AE | SE54T  | 2.489  |
| 3KBH | AE | YA23A  | 1.812  |
| 3KBH | AE | YA23F  | 1.615  |
| 3KBH | AE | YE17A  | 0.100  |
| 3LB6 | AC | FA103A | 5.115  |
| 3LB6 | AC | IA10A  | 3.721  |

|      |    |               |        |
|------|----|---------------|--------|
| 3LB6 | AC | KA100A        | 5.812  |
| 3LB6 | AC | KA101A        | 2.544  |
| 3M62 | AB | DA46A         | 2.799  |
| 3M62 | AB | EA32A         | 0.829  |
| 3M62 | AB | EA55A         | 1.051  |
| 3M62 | AB | FB7A          | 0.995  |
| 3M62 | AB | GA102A        | 1.264  |
| 3M62 | AB | IA110A        | 1.853  |
| 3M62 | AB | IB43A         | 2.882  |
| 3M62 | AB | LA50A         | 2.828  |
| 3M62 | AB | MB69A         | 0.681  |
| 3M62 | AB | QB50A         | 1.054  |
| 3M62 | AB | QB65A         | 0.284  |
| 3M62 | AB | RA98A         | 0.788  |
| 3M62 | AB | SB45A         | 1.278  |
| 3M62 | AB | TA54A         | 0.017  |
| 3M62 | AB | VB48A         | 1.090  |
| 3M62 | AB | VB67A         | 1.138  |
| 3M62 | AB | YA103A        | 4.475  |
| 3M63 | AB | DA46A         | 2.233  |
| 3M63 | AB | EA55A         | 0.346  |
| 3M63 | AB | FA113A        | 1.791  |
| 3M63 | AB | GA102A        | 0.125  |
| 3M63 | AB | IA110A        | 1.089  |
| 3M63 | AB | LA50A         | 0.576  |
| 3M63 | AB | RA98A         | -0.185 |
| 3M63 | AB | TA54A         | 0.311  |
| 3M63 | AB | VA106A        | 1.838  |
| 3M63 | AB | YA103A        | 3.649  |
| 3MZG | AB | HA14A         | -0.019 |
| 3MZG | AB | HA167A        | 1.487  |
| 3MZG | AB | HA167A,HB188A | 2.653  |
| 3MZG | AB | HA17A         | 0.062  |
| 3MZG | AB | HB188A        | 1.776  |
| 3N06 | AB | AA14H         | 0.019  |
| 3NCB | AB | AA167H        | -1.487 |
| 3NCC | AB | AB188H        | -1.776 |
| 3NVN | BA | RA193E        | 2.527  |
| 3NVN | BA | RB186S        | 1.289  |
| 3NVQ | BA | RA157E        | 1.571  |
| 3NVQ | BA | RA159E        | 1.586  |
| 3Q3J | AB | YB100F        | 0.211  |
| 3QHY | AB | DB127A        | 0.380  |
| 3QHY | AB | DB12A         | 2.254  |
| 3QHY | AB | DB130A        | 0.961  |
| 3QHY | AB | DB166A        | 3.496  |
| 3QHY | AB | DB91A         | 1.888  |
| 3QHY | AB | EB228A        | 3.011  |
| 3QHY | AB | FB169A        | 2.061  |
| 3QHY | AB | FB190A        | 3.074  |
| 3QHY | AB | FB34A         | 3.982  |
| 3QHY | AB | IB189A        | 3.066  |
| 3QHY | AB | LB51A         | 0.816  |
| 3QHY | AB | NB10A         | 2.254  |
| 3QHY | AB | NB264A        | 2.695  |
| 3QHY | AB | NB72A         | 1.605  |
| 3QHY | AB | RB246A        | 0.535  |
| 3QHY | AB | WB112A        | 3.788  |
| 3QHY | AB | WB13A         | 2.862  |

|      |    |              |        |
|------|----|--------------|--------|
| 3QHY | AB | WB229A       | 5.430  |
| 3QHY | AB | YB151A       | 3.422  |
| 3QHY | AB | YB168A       | 1.743  |
| 3QHY | AB | YB208A       | 0.240  |
| 3QHY | AB | YB33A        | 2.902  |
| 3QHY | AB | YB73A        | 0.801  |
| 3RF3 | AC | AC8K         | 1.728  |
| 3S9D | AB | AA116G       | 2.118  |
| 3S9D | AB | AA116M       | 1.073  |
| 3S9D | AB | AA12W        | -0.181 |
| 3S9D | AB | AB67M        | -0.168 |
| 3S9D | AB | DA28A        | 0.301  |
| 3S9D | AB | EB39A        | 0.206  |
| 3S9D | AB | EB39R        | 0.651  |
| 3S9D | AB | EB66A        | 2.414  |
| 3S9D | AB | EB66A,AA116G | 5.039  |
| 3S9D | AB | EB66A,LA124A | 3.768  |
| 3S9D | AB | EB66A,LA23A  | 6.055  |
| 3S9D | AB | EB66A,LA8A   | 4.090  |
| 3S9D | AB | EB66A,MA119A | 4.978  |
| 3S9D | AB | EB66A,RA120A | 3.631  |
| 3S9D | AB | EB66A,SA123A | 3.542  |
| 3S9D | AB | FA20A        | 0.710  |
| 3S9D | AB | HA27A        | 0.541  |
| 3S9D | AB | HB166A       | 0.000  |
| 3S9D | AB | HB65A        | 0.823  |
| 3S9D | AB | HB65A,LA124A | 2.938  |
| 3S9D | AB | HB65A,LA19A  | 3.055  |
| 3S9D | AB | HB65A,LA8A   | 4.015  |
| 3S9D | AB | HB65A,RA120A | 3.844  |
| 3S9D | AB | HB65A,RA5A   | 2.213  |
| 3S9D | AB | HB65A,SA123A | 1.135  |
| 3S9D | AB | IB34A        | 1.852  |
| 3S9D | AB | IB34A,AA116G | 4.472  |
| 3S9D | AB | IB34A,LA124A | 3.560  |
| 3S9D | AB | IB34A,MA119A | 4.233  |
| 3S9D | AB | IB34A,RA120A | 4.999  |
| 3S9D | AB | IB34A,SA123A | 3.005  |
| 3S9D | AB | IB90A        | 1.617  |
| 3S9D | AB | IB90A,FA20A  | 2.815  |
| 3S9D | AB | IB90A,LA124A | 3.345  |
| 3S9D | AB | IB90A,LA19A  | 3.034  |
| 3S9D | AB | IB90A,LA23A  | 5.447  |
| 3S9D | AB | IB90A,LA8A   | 3.739  |
| 3S9D | AB | IB90A,MA119A | 4.033  |
| 3S9D | AB | IB90A,RA120A | 4.906  |
| 3S9D | AB | IB90A,SA123A | 3.255  |
| 3S9D | AB | KB37A        | 0.504  |
| 3S9D | AB | LA124A       | 1.447  |
| 3S9D | AB | LA19A        | 1.105  |
| 3S9D | AB | LA23A        | 3.808  |
| 3S9D | AB | LA23V        | 2.436  |
| 3S9D | AB | LA8A         | 1.536  |
| 3S9D | AB | MA119A       | 2.253  |
| 3S9D | AB | MA9A         | 0.062  |
| 3S9D | AB | MB35A        | 2.998  |
| 3S9D | AB | MB35V        | 2.374  |
| 3S9D | AB | MB35V,AA116G | 5.298  |
| 3S9D | AB | MB35V,LA124A | 4.531  |



|      |    |                        |        |
|------|----|------------------------|--------|
| 3S9D | AB | MB35V,LA19A            | 4.315  |
| 3S9D | AB | MB35V,LA23A            | 7.110  |
| 3S9D | AB | MB35V,LA8A             | 4.425  |
| 3S9D | AB | MB35V,MA119A           | 5.454  |
| 3S9D | AB | MB35V,RA120A           | 6.064  |
| 3S9D | AB | MB35V,SA123A           | 4.078  |
| 3S9D | AB | NA127A                 | -0.043 |
| 3S9D | AB | NB85A                  | -0.171 |
| 3S9D | AB | RA120A                 | 3.021  |
| 3S9D | AB | RA120A,EB66A           | 3.601  |
| 3S9D | AB | RA15A                  | 0.195  |
| 3S9D | AB | RA26A                  | 5.123  |
| 3S9D | AB | RA26K                  | 4.586  |
| 3S9D | AB | RA26Q                  | 6.079  |
| 3S9D | AB | RA5A                   | 0.622  |
| 3S9D | AB | SA123A                 | 1.122  |
| 3S9D | AB | SA18A                  | -0.099 |
| 3S9D | AB | SB36A                  | 0.505  |
| 3S9D | AB | TB33A                  | 1.730  |
| 3S9D | AB | TB33A,AA116G           | 4.349  |
| 3S9D | AB | TB33A,FA20A            | 3.020  |
| 3S9D | AB | TB33A,LA124A           | 3.311  |
| 3S9D | AB | TB33A,LA19A            | 3.393  |
| 3S9D | AB | TB33A,LA23A            | 5.958  |
| 3S9D | AB | TB33A,LA8A             | 3.577  |
| 3S9D | AB | TB33A,MA119A           | 4.462  |
| 3S9D | AB | TB33A,RA120A           | 5.266  |
| 3S9D | AB | TB33A,SA123A           | 3.062  |
| 3S9D | AB | VB69A                  | 2.317  |
| 3S9D | AB | WB87A                  | 1.112  |
| 3S9D | AB | WB87A,LA124A           | 2.943  |
| 3S9D | AB | WB87A,LA8A             | 3.075  |
| 3S9D | AB | WB87A,MA119A           | 3.844  |
| 3S9D | AB | WB87A,RA5A             | 2.340  |
| 3S9D | AB | WB87A,SA123A           | 2.750  |
| 3SGB | EI | AI9C                   | 0.041  |
| 3SGB | EI | AI9D                   | 0.470  |
| 3SGB | EI | AI9D,GI26A             | 1.066  |
| 3SGB | EI | AI9D,GI26A,NI27S       | 2.153  |
| 3SGB | EI | AI9D,LI12A             | 2.583  |
| 3SGB | EI | AI9D,LI12A,YI14D       | 5.688  |
| 3SGB | EI | AI9E                   | 0.662  |
| 3SGB | EI | AI9F                   | -1.164 |
| 3SGB | EI | AI9G                   | 2.452  |
| 3SGB | EI | AI9H                   | -0.447 |
| 3SGB | EI | AI9I                   | -0.447 |
| 3SGB | EI | AI9K                   | 2.457  |
| 3SGB | EI | AI9L                   | 0.166  |
| 3SGB | EI | AI9M                   | 0.088  |
| 3SGB | EI | AI9N                   | -0.088 |
| 3SGB | EI | AI9P                   | 0.545  |
| 3SGB | EI | AI9Q                   | 0.424  |
| 3SGB | EI | AI9R                   | 2.007  |
| 3SGB | EI | AI9R,LI12R             | 5.077  |
| 3SGB | EI | AI9R,TI11K,LI12R       | 6.686  |
| 3SGB | EI | AI9R,TI11K,LI12R,EI13S | 7.095  |
| 3SGB | EI | AI9R,TI11K,LI12R,RI15L | 6.885  |
| 3SGB | EI | AI9R,TI11P,LI12R       | 8.449  |
| 3SGB | EI | AI9S                   | 0.898  |

|      |    |                       |        |
|------|----|-----------------------|--------|
| 3SGB | EI | AI9T                  | 0.326  |
| 3SGB | EI | AI9T,LI12M            | 0.470  |
| 3SGB | EI | AI9V                  | -0.712 |
| 3SGB | EI | AI9V,TI11S            | 1.585  |
| 3SGB | EI | AI9W                  | -1.532 |
| 3SGB | EI | AI9Y                  | -1.624 |
| 3SGB | EI | EI13A                 | 1.005  |
| 3SGB | EI | EI13C                 | 1.158  |
| 3SGB | EI | EI13D                 | 0.545  |
| 3SGB | EI | EI13F                 | 1.917  |
| 3SGB | EI | EI13G                 | 2.076  |
| 3SGB | EI | EI13H                 | 0.519  |
| 3SGB | EI | EI13I                 | -0.615 |
| 3SGB | EI | EI13K                 | 0.166  |
| 3SGB | EI | EI13L                 | 0.768  |
| 3SGB | EI | EI13M                 | -0.187 |
| 3SGB | EI | EI13N                 | 1.087  |
| 3SGB | EI | EI13P                 | 2.243  |
| 3SGB | EI | EI13Q                 | 0.181  |
| 3SGB | EI | EI13R                 | 1.257  |
| 3SGB | EI | EI13S                 | 1.917  |
| 3SGB | EI | EI13T                 | 2.114  |
| 3SGB | EI | EI13V                 | 0.126  |
| 3SGB | EI | EI13W                 | 1.526  |
| 3SGB | EI | EI13Y                 | 0.768  |
| 3SGB | EI | GI26A                 | 1.276  |
| 3SGB | EI | GI26C                 | 2.575  |
| 3SGB | EI | GI26D                 | 1.602  |
| 3SGB | EI | GI26E                 | 1.945  |
| 3SGB | EI | GI26F                 | 2.980  |
| 3SGB | EI | GI26H                 | 2.700  |
| 3SGB | EI | GI26I                 | 4.036  |
| 3SGB | EI | GI26K                 | 2.490  |
| 3SGB | EI | GI26L                 | 2.621  |
| 3SGB | EI | GI26M                 | 2.755  |
| 3SGB | EI | GI26N                 | 2.243  |
| 3SGB | EI | GI26P                 | 1.082  |
| 3SGB | EI | GI26Q                 | 2.915  |
| 3SGB | EI | GI26R                 | 3.459  |
| 3SGB | EI | GI26S                 | 1.585  |
| 3SGB | EI | GI26T                 | 2.992  |
| 3SGB | EI | GI26V                 | 2.788  |
| 3SGB | EI | GI26W                 | 3.858  |
| 3SGB | EI | GI26Y                 | 3.053  |
| 3SGB | EI | KI7A                  | -2.536 |
| 3SGB | EI | KI7C                  | -0.577 |
| 3SGB | EI | KI7D                  | -0.615 |
| 3SGB | EI | KI7E                  | 0.032  |
| 3SGB | EI | KI7F                  | -0.715 |
| 3SGB | EI | KI7G                  | -0.715 |
| 3SGB | EI | KI7H                  | -0.396 |
| 3SGB | EI | KI7I                  | -1.326 |
| 3SGB | EI | KI7L                  | -1.792 |
| 3SGB | EI | KI7M                  | -1.150 |
| 3SGB | EI | KI7N                  | -0.650 |
| 3SGB | EI | KI7P                  | 0.000  |
| 3SGB | EI | KI7Q                  | -0.615 |
| 3SGB | EI | KI7R                  | -0.683 |
| 3SGB | EI | KI7R,AI9R,TI11K,LI12R | 5.515  |

|      |    |                                        |        |
|------|----|----------------------------------------|--------|
| 3SGB | EI | KI7R,PI8F,AI9R,TI11K,LI12R             | 5.656  |
| 3SGB | EI | KI7S                                   | -2.552 |
| 3SGB | EI | KI7S,PI8D,AI9Y                         | -4.094 |
| 3SGB | EI | KI7S,PI8D,AI9Y,LI12G,EI13I,RI15K       | 0.095  |
| 3SGB | EI | KI7T                                   | -1.922 |
| 3SGB | EI | KI7T,PI8E,AI9Y                         | -3.817 |
| 3SGB | EI | KI7T,PI8E,AI9Y,LI12G,RI15M,GI26P,NI30V | 1.828  |
| 3SGB | EI | KI7V                                   | -0.942 |
| 3SGB | EI | KI7W                                   | -0.013 |
| 3SGB | EI | KI7Y                                   | -0.577 |
| 3SGB | EI | LI12A                                  | 2.931  |
| 3SGB | EI | LI12C                                  | -0.013 |
| 3SGB | EI | LI12D                                  | 5.590  |
| 3SGB | EI | LI12E                                  | 6.089  |
| 3SGB | EI | LI12F                                  | 1.355  |
| 3SGB | EI | LI12G                                  | 4.934  |
| 3SGB | EI | LI12H                                  | 1.690  |
| 3SGB | EI | LI12I                                  | 4.419  |
| 3SGB | EI | LI12I,GI26D                            | 5.764  |
| 3SGB | EI | LI12K                                  | 3.138  |
| 3SGB | EI | LI12M                                  | 0.447  |
| 3SGB | EI | LI12M,GI26D                            | 2.243  |
| 3SGB | EI | LI12M,YI14Q                            | 3.724  |
| 3SGB | EI | LI12N                                  | 3.352  |
| 3SGB | EI | LI12P                                  | 8.328  |
| 3SGB | EI | LI12Q                                  | 2.510  |
| 3SGB | EI | LI12R                                  | 3.320  |
| 3SGB | EI | LI12S                                  | 4.100  |
| 3SGB | EI | LI12T                                  | 3.160  |
| 3SGB | EI | LI12V                                  | 2.992  |
| 3SGB | EI | LI12W                                  | 1.839  |
| 3SGB | EI | LI12Y                                  | 1.653  |
| 3SGB | EI | NI30A                                  | 0.326  |
| 3SGB | EI | NI30C                                  | 0.345  |
| 3SGB | EI | NI30D                                  | 0.898  |
| 3SGB | EI | NI30E                                  | 0.949  |
| 3SGB | EI | NI30F                                  | -0.139 |
| 3SGB | EI | NI30G                                  | 0.307  |
| 3SGB | EI | NI30H                                  | -0.123 |
| 3SGB | EI | NI30I                                  | 0.195  |
| 3SGB | EI | NI30K                                  | 0.571  |
| 3SGB | EI | NI30L                                  | 0.730  |
| 3SGB | EI | NI30M                                  | 0.139  |
| 3SGB | EI | NI30P                                  | 0.571  |
| 3SGB | EI | NI30Q                                  | 0.240  |
| 3SGB | EI | NI30R                                  | 0.571  |
| 3SGB | EI | NI30S                                  | 0.403  |
| 3SGB | EI | NI30T                                  | 0.010  |
| 3SGB | EI | NI30V                                  | -0.239 |
| 3SGB | EI | NI30W                                  | 0.519  |
| 3SGB | EI | NI30Y                                  | -0.107 |
| 3SGB | EI | PI8A                                   | -0.187 |
| 3SGB | EI | PI8C                                   | -0.323 |
| 3SGB | EI | PI8D                                   | -1.019 |
| 3SGB | EI | PI8E                                   | -0.615 |
| 3SGB | EI | PI8F                                   | -0.340 |
| 3SGB | EI | PI8G                                   | 0.053  |
| 3SGB | EI | PI8H                                   | 0.274  |
| 3SGB | EI | PI8I                                   | -0.023 |

|      |    |                       |        |
|------|----|-----------------------|--------|
| 3SGB | EI | PI8K                  | 0.112  |
| 3SGB | EI | PI8L                  | -0.139 |
| 3SGB | EI | PI8M                  | -0.494 |
| 3SGB | EI | PI8N                  | -0.123 |
| 3SGB | EI | PI8Q                  | -0.312 |
| 3SGB | EI | PI8R                  | 0.307  |
| 3SGB | EI | PI8S                  | 0.065  |
| 3SGB | EI | PI8S,AI9L,TI11K,LI12R | 4.906  |
| 3SGB | EI | PI8S,AI9R,TI11P,LI12R | 8.102  |
| 3SGB | EI | PI8T                  | -0.107 |
| 3SGB | EI | PI8V                  | -0.306 |
| 3SGB | EI | PI8W                  | -0.494 |
| 3SGB | EI | PI8Y                  | -0.396 |
| 3SGB | EI | RI15A                 | 0.053  |
| 3SGB | EI | RI15C                 | 0.545  |
| 3SGB | EI | RI15D                 | 0.630  |
| 3SGB | EI | RI15E                 | 0.662  |
| 3SGB | EI | RI15F                 | 0.225  |
| 3SGB | EI | RI15G                 | 1.092  |
| 3SGB | EI | RI15H                 | 0.447  |
| 3SGB | EI | RI15I                 | 0.240  |
| 3SGB | EI | RI15K                 | -0.274 |
| 3SGB | EI | RI15L                 | 0.225  |
| 3SGB | EI | RI15M                 | 0.126  |
| 3SGB | EI | RI15N                 | 0.326  |
| 3SGB | EI | RI15P                 | 7.578  |
| 3SGB | EI | RI15Q                 | 0.041  |
| 3SGB | EI | RI15S                 | 0.274  |
| 3SGB | EI | RI15T                 | 0.447  |
| 3SGB | EI | RI15V                 | -0.023 |
| 3SGB | EI | RI15W                 | 0.307  |
| 3SGB | EI | RI15Y                 | 0.290  |
| 3SGB | EI | TI11A                 | 3.363  |
| 3SGB | EI | TI11C                 | 2.886  |
| 3SGB | EI | TI11D                 | 4.887  |
| 3SGB | EI | TI11E                 | 4.564  |
| 3SGB | EI | TI11F                 | 3.589  |
| 3SGB | EI | TI11G                 | 5.507  |
| 3SGB | EI | TI11H                 | 3.459  |
| 3SGB | EI | TI11I                 | 1.729  |
| 3SGB | EI | TI11K                 | 2.007  |
| 3SGB | EI | TI11K,LI12R           | 5.233  |
| 3SGB | EI | TI11L                 | 2.437  |
| 3SGB | EI | TI11M                 | 2.007  |
| 3SGB | EI | TI11M,LI12S,GI26V     | 6.814  |
| 3SGB | EI | TI11N                 | 3.209  |
| 3SGB | EI | TI11P                 | 3.138  |
| 3SGB | EI | TI11P,LI12K           | 6.232  |
| 3SGB | EI | TI11P,LI12K,GI26D     | 6.452  |
| 3SGB | EI | TI11Q                 | 2.899  |
| 3SGB | EI | TI11R                 | 1.945  |
| 3SGB | EI | TI11R,LI12R           | 5.475  |
| 3SGB | EI | TI11S                 | 2.468  |
| 3SGB | EI | TI11V                 | 2.228  |
| 3SGB | EI | TI11W                 | 2.992  |
| 3SGB | EI | TI11Y                 | 3.320  |
| 3SGB | EI | YI14A                 | 1.917  |
| 3SGB | EI | YI14C                 | 1.672  |
| 3SGB | EI | YI14D                 | 2.825  |

|      |    |                   |        |
|------|----|-------------------|--------|
| 3SGB | EI | YI14E             | 2.007  |
| 3SGB | EI | YI14F             | 0.166  |
| 3SGB | EI | YI14G             | 2.803  |
| 3SGB | EI | YI14H             | 1.538  |
| 3SGB | EI | YI14I             | 3.542  |
| 3SGB | EI | YI14K             | 3.385  |
| 3SGB | EI | YI14L             | 1.554  |
| 3SGB | EI | YI14M             | 1.975  |
| 3SGB | EI | YI14N             | 3.115  |
| 3SGB | EI | YI14P             | 6.189  |
| 3SGB | EI | YI14Q             | 3.235  |
| 3SGB | EI | YI14R             | 2.722  |
| 3SGB | EI | YI14S             | 2.007  |
| 3SGB | EI | YI14T             | 4.804  |
| 3SGB | EI | YI14V             | 4.360  |
| 3SGB | EI | YI14W             | 0.383  |
| 3WWN | AB | KA225E            | 0.175  |
| 3WWN | AB | RA221E            | -0.376 |
| 4BFI | AB | FB95A             | 2.076  |
| 4BFI | AB | FB95D             | 2.727  |
| 4BFI | AB | KB99E             | 2.317  |
| 4BFI | AB | LB29K             | 2.076  |
| 4BFI | AB | LB91A             | 1.307  |
| 4BFI | AB | NB43A             | 2.317  |
| 4BFI | AB | NB43D             | 2.727  |
| 4BFI | AB | NB93K             | 2.727  |
| 4CPA | AI | PI35G             | 2.595  |
| 4CPA | AI | VI37A             | 2.324  |
| 4CPA | AI | VI37F             | 0.000  |
| 4CPA | AI | VI37G             | 3.733  |
| 4CPA | AI | VI37I             | 0.199  |
| 4CPA | AI | VI37L             | 1.279  |
| 4CPA | AI | YI36F             | 0.000  |
| 4CPA | AI | YI36G             | 0.502  |
| 4CVW | AC | DA720R            | 3.046  |
| 4CVW | AC | DA720W            | 1.221  |
| 4CVW | AC | LC34G             | 2.727  |
| 4CVW | AC | LC34G,VC35D       | 7.742  |
| 4CVW | AC | LC34W             | 0.335  |
| 4CVW | AC | RC27A             | 1.828  |
| 4CVW | AC | RC31A             | 2.076  |
| 4CVW | AC | RC31W             | 1.490  |
| 4CVW | AC | VC35D             | 4.918  |
| 4FZA | AB | EB122A            | 0.425  |
| 4FZA | AB | FA168E            | 0.543  |
| 4FZA | AB | RA217A            | 1.027  |
| 4FZA | AB | YA213A            | 1.270  |
| 4GU0 | AE | LE20A,TE22A,RE26A | 0.894  |
| 4HRN | AD | FD47A             | 2.459  |
| 4HRN | AD | LD17A             | 2.597  |
| 4HRN | AD | SD43A             | 0.803  |
| 4HRN | AD | VD44A             | 2.811  |
| 4LOP | AB | EA27K             | 2.665  |
| 4LOP | AB | TA76Q             | 1.471  |
| 4NZW | AB | EB124A            | 0.357  |
| 4NZW | AB | EB49A             | 0.325  |
| 4NZW | AB | KA77A             | 0.076  |
| 4O27 | AB | EB42A             | 0.371  |
| 4O27 | AB | YA215A            | 1.195  |

|      |    |                         |        |
|------|----|-------------------------|--------|
| 4OFY | AD | DA38A                   | 0.549  |
| 4OFY | AD | EA88A                   | 0.282  |
| 4OFY | AD | FA40A                   | 4.602  |
| 4OFY | AD | LD42A                   | 2.567  |
| 4OFY | AD | MA36A                   | 0.084  |
| 4OFY | AD | QA34A                   | 1.176  |
| 4OFY | AD | QA34A,FA40A             | 4.139  |
| 4OFY | AD | QA34A,MA36A,FA40A,SA87A | 4.459  |
| 4OFY | AD | QA85A                   | 1.732  |
| 4OFY | AD | QD34A                   | 2.869  |
| 4OFY | AD | QD86A                   | 4.643  |
| 4OFY | AD | RD96A                   | 3.419  |
| 4OFY | AD | SA87A                   | 0.142  |
| 4Y61 | AB | FB219A,HB222A           | 0.289  |
| 4Y61 | AB | RB86A                   | -0.193 |
| 4Y61 | AB | YA246A                  | -0.078 |
| 4YFD | AB | DB7A                    | -0.055 |
| 4YFD | AB | EA259A                  | 1.216  |
| 4YFD | AB | KB71A                   | 1.474  |
| 4YFD | AB | RA169A                  | 0.159  |
| 4YFD | AB | WB4A                    | 1.132  |
| 4YH7 | AB | DB7A                    | 1.642  |
| 4YH7 | AB | RA169A                  | 1.438  |
| 4YH7 | AB | YA246A                  | 1.034  |
| 5E6P | AB | AA494E                  | 1.099  |
| 5E6P | AB | AA495E                  | 1.577  |
| 5E6P | AB | IB22A                   | 0.274  |
| 5E6P | AB | LB24A                   | 0.913  |
| 5E6P | AB | RB42A                   | 0.677  |
| 5E6P | AB | RB42E                   | 1.744  |
| 5E6P | AB | YA468A                  | 0.358  |
| 5K39 | AB | FB142A                  | 2.898  |
| 5K39 | AB | IB148A                  | 2.190  |
| 5K39 | AB | MB108A                  | -0.510 |
| 5K39 | AB | MB112A                  | -0.249 |
| 5M2O | AB | EA80A                   | 0.723  |
| 5M2O | AB | EA80A,HA117A            | 2.614  |
| 5M2O | AB | EA80A,NA120A            | 1.251  |
| 5M2O | AB | HA117A                  | 0.912  |
| 5M2O | AB | HA117A,NA120A           | 2.416  |
| 5M2O | AB | IB17A                   | 2.093  |
| 5M2O | AB | KA73A                   | -0.782 |
| 5M2O | AB | KB32A                   | 1.099  |
| 5M2O | AB | LA75A                   | 1.681  |
| 5M2O | AB | LB65A                   | 0.879  |
| 5M2O | AB | NA120A                  | 0.465  |
| 5M2O | AB | NA64A                   | 0.043  |
| 5M2O | AB | NA71A                   | 0.160  |
| 5M2O | AB | NA71A,EA80A             | 1.063  |
| 5M2O | AB | NA71A,HA117A            | 2.362  |
| 5M2O | AB | NA71A,NA120A            | 2.541  |
| 5M2O | AB | QB25A                   | 1.183  |
| 5M2O | AB | QB61A                   | -0.163 |
| 5M2O | AB | SB18A                   | 0.049  |
| 5M2O | AB | VB21A                   | 2.525  |
| 5M2O | AB | VB21A,QB25A             | 3.427  |

**Table S7.** Experimental data for TestSet1.

| PDB  | Chains | Mutations            | Experimental $\Delta\Delta G_{bind}$ |
|------|--------|----------------------|--------------------------------------|
| 1A4Y | AB     | DA435A               | 3.484                                |
| 1A4Y | AB     | EA344A               | 0.179                                |
| 1A4Y | AB     | EA401A               | 0.883                                |
| 1A4Y | AB     | EB108A               | -0.323                               |
| 1A4Y | AB     | HB114A               | 0.656                                |
| 1A4Y | AB     | HB13A                | -0.297                               |
| 1A4Y | AB     | HB84A                | 0.170                                |
| 1A4Y | AB     | HB8A                 | 0.904                                |
| 1A4Y | AB     | IA459A               | 0.679                                |
| 1A4Y | AB     | KA320A               | -0.310                               |
| 1A4Y | AB     | KB40G                | 3.235                                |
| 1A4Y | AB     | KB40G,DA435A         | 4.105                                |
| 1A4Y | AB     | KB40G,YA434A,DA435A  | 6.211                                |
| 1A4Y | AB     | KB40G,YA434A,YA437A  | 9.119                                |
| 1A4Y | AB     | KB40G,YA434F         | 6.662                                |
| 1A4Y | AB     | KB40G,YA437A         | 6.451                                |
| 1A4Y | AB     | KB40Q                | 4.250                                |
| 1A4Y | AB     | NB68A                | 0.118                                |
| 1A4Y | AB     | QA430A,VA432A        | 0.072                                |
| 1A4Y | AB     | QB12A                | 0.300                                |
| 1A4Y | AB     | RB31A                | 0.250                                |
| 1A4Y | AB     | RB32A                | 0.910                                |
| 1A4Y | AB     | RB5A                 | 2.308                                |
| 1A4Y | AB     | RB5A,DA435A          | 6.770                                |
| 1A4Y | AB     | RB5A,YA434A          | 6.976                                |
| 1A4Y | AB     | RB5A,YA434A,DA435A   | 10.102                               |
| 1A4Y | AB     | RB5A,YA434A,YA437A   | 8.527                                |
| 1A4Y | AB     | SA289A               | 0.042                                |
| 1A4Y | AB     | WA261A               | 0.101                                |
| 1A4Y | AB     | WA263A               | 1.171                                |
| 1A4Y | AB     | WA318A               | 1.500                                |
| 1A4Y | AB     | WA375A               | 1.035                                |
| 1A4Y | AB     | WA438A,SA439A,EA440A | 1.785                                |
| 1A4Y | AB     | WB89A                | 0.240                                |
| 1A4Y | AB     | YA434A               | 3.260                                |
| 1A4Y | AB     | YA434A,DA435A        | 6.817                                |
| 1A4Y | AB     | YA434A,YA437A        | 6.642                                |
| 1A4Y | AB     | YA434F               | 0.558                                |
| 1A4Y | AB     | YA437A               | 0.836                                |
| 1A4Y | AB     | YA437F               | 0.245                                |
| 1ACB | EI     | LI38D                | 6.771                                |
| 1ACB | EI     | LI38E                | 6.554                                |
| 1ACB | EI     | LI38G                | 6.033                                |
| 1ACB | EI     | LI38I                | 4.230                                |
| 1ACB | EI     | LI38P                | 6.852                                |
| 1ACB | EI     | LI38S                | 4.951                                |
| 1B2S | AD     | AA27K                | -3.864                               |
| 1B2S | AD     | AA27K,AD43T          | -5.721                               |
| 1B2S | AD     | AD43T                | -0.343                               |
| 1B2U | AD     | AD36D                | -4.166                               |
| 1B3S | AD     | AA102H               | -5.679                               |
| 1B3S | AD     | AA102H,FD30Y         | -5.547                               |
| 1B3S | AD     | FD30Y                | 0.596                                |
| 1BRS | AD     | DD35A                | 4.284                                |
| 1BRS | AD     | DD39A                | 6.790                                |
| 1BRS | AD     | EA58A                | 0.095                                |
| 1BRS | AD     | EA71A                | 2.352                                |

|      |    |              |        |
|------|----|--------------|--------|
| 1BRS | AD | EA71A,DD35A  | 6.437  |
| 1BRS | AD | EA71A,DD39A  | 7.182  |
| 1BRS | AD | EA71C        | 2.527  |
| 1BRS | AD | EA71F        | 2.234  |
| 1BRS | AD | EA71F,DD35A  | 6.407  |
| 1BRS | AD | EA71F,DD39A  | 7.468  |
| 1BRS | AD | EA71Q        | 1.451  |
| 1BRS | AD | EA71Q,DD39A  | 7.204  |
| 1BRS | AD | EA71Q,ED74A  | 3.525  |
| 1BRS | AD | EA71S        | 3.009  |
| 1BRS | AD | EA71W        | 1.656  |
| 1BRS | AD | EA71W,DD35A  | 5.710  |
| 1BRS | AD | EA71W,DD39A  | 6.662  |
| 1BRS | AD | EA71W,ED74A  | 3.548  |
| 1BRS | AD | EA71Y        | 2.413  |
| 1BRS | AD | ED74A        | 1.093  |
| 1BRS | AD | HA100A       | 6.344  |
| 1BRS | AD | HA100A,DD39A | 8.987  |
| 1BRS | AD | HA100A,ED74A | 7.559  |
| 1BRS | AD | HA100A,TD42A | 8.132  |
| 1BRS | AD | HA100A,WD38F | 7.638  |
| 1BRS | AD | HA100A,YD29A | 6.304  |
| 1BRS | AD | HA100A,YD29F | 5.547  |
| 1BRS | AD | HA100D       | 4.548  |
| 1BRS | AD | HA100G       | 6.817  |
| 1BRS | AD | HA100Q       | 4.548  |
| 1BRS | AD | HA100Q,RA57A | 9.304  |
| 1BRS | AD | HA100Q,RA57K | 6.909  |
| 1BRS | AD | KA25A        | 5.124  |
| 1BRS | AD | KA25A,DD35A  | 9.544  |
| 1BRS | AD | KA25A,DD39A  | 8.274  |
| 1BRS | AD | KA25A,ED74A  | 6.693  |
| 1BRS | AD | KA25A,TD42A  | 5.721  |
| 1BRS | AD | KA25A,WD38F  | 5.111  |
| 1BRS | AD | KA25A,YD29A  | 8.620  |
| 1BRS | AD | NA56A        | 3.090  |
| 1BRS | AD | RA57A        | 4.986  |
| 1BRS | AD | RA57A,DD35A  | 6.331  |
| 1BRS | AD | RA57A,DD39A  | 11.356 |
| 1BRS | AD | RA57A,ED74A  | 4.968  |
| 1BRS | AD | RA57A,TD42A  | 6.817  |
| 1BRS | AD | RA57A,WD38F  | 6.275  |
| 1BRS | AD | RA57A,YD29A  | 8.119  |
| 1BRS | AD | RA57K        | 2.487  |
| 1BRS | AD | RA81Q        | 5.417  |
| 1BRS | AD | RA81Q,DD35A  | 9.601  |
| 1BRS | AD | RA81Q,DD39A  | 6.436  |
| 1BRS | AD | RA81Q,ED74A  | 6.718  |
| 1BRS | AD | RA81Q,TD42A  | 6.104  |
| 1BRS | AD | RA81Q,WD38F  | 6.755  |
| 1BRS | AD | RA81Q,YD29A  | 8.289  |
| 1BRS | AD | RA85A        | 5.755  |
| 1BRS | AD | RA85A,DD39A  | 7.182  |
| 1BRS | AD | RA85A,ED74A  | 6.863  |
| 1BRS | AD | RA85A,TD42A  | 7.017  |
| 1BRS | AD | RA85A,WD38F  | 7.037  |
| 1BRS | AD | RA85A,YD29A  | 8.049  |
| 1BRS | AD | TD42A        | 1.857  |
| 1BRS | AD | WA33F        | 1.260  |



|      |    |             |        |
|------|----|-------------|--------|
| 1BRS | AD | WD38F       | 1.642  |
| 1BRS | AD | WD44F       | 0.056  |
| 1BRS | AD | YD29A       | 3.469  |
| 1BRS | AD | YD29F       | -0.132 |
| 1E50 | AB | DA8A        | -0.316 |
| 1E50 | AB | MA48A       | 1.320  |
| 1E50 | AB | NA11A       | 0.678  |
| 1E50 | AB | NA51A       | 1.919  |
| 1E50 | AB | NB62A       | 0.964  |
| 1E50 | AB | NB99A       | 1.407  |
| 1E50 | AB | RB32A       | 1.774  |
| 1E50 | AB | SA56A       | 0.978  |
| 1E50 | AB | SB64A       | 0.115  |
| 1E50 | AB | TA103A      | 2.184  |
| 1E50 | AB | TA91A       | 1.277  |
| 1E50 | AB | VA101A      | -0.044 |
| 1E50 | AB | VB57A       | 0.000  |
| 1E50 | AB | YA55A       | 0.914  |
| 1E96 | AB | IA33N       | 2.008  |
| 1E96 | AB | NA26H       | 1.085  |
| 1EAW | AB | DA47A       | 1.502  |
| 1EAW | AB | DA91A       | 0.654  |
| 1EAW | AB | FA92A       | 0.892  |
| 1EAW | AB | HA138A      | -0.014 |
| 1EAW | AB | IA26A       | -0.822 |
| 1EAW | AB | QA23A       | -0.519 |
| 1EAW | AB | RA48A       | 0.587  |
| 1EAW | AB | YA141A      | 0.502  |
| 1EAW | AB | YA52A       | -0.079 |
| 1FC2 | CD | FC1M        | 0.912  |
| 1FC2 | CD | IC27A       | 3.729  |
| 1FC2 | CD | KC31A       | 1.379  |
| 1FC2 | CD | LC13D       | 1.127  |
| 1FC2 | CD | NC24A       | 0.593  |
| 1FC2 | CD | NC24F       | 0.845  |
| 1FC2 | CD | NC2F        | -0.108 |
| 1FC2 | CD | NC2Q        | 0.000  |
| 1FC2 | CD | NC7F        | 0.091  |
| 1FC2 | CD | QC28K       | 0.170  |
| 1FC2 | CD | QC28L       | 0.458  |
| 1FC2 | CD | YC10F       | 1.027  |
| 1FC2 | CD | YC10W       | 0.410  |
| 1FCC | AC | DC40A       | 0.272  |
| 1FCC | AC | EC27A       | 4.936  |
| 1FCC | AC | EC42A       | 0.385  |
| 1FCC | AC | KC28A       | 1.256  |
| 1FCC | AC | KC31A       | 3.476  |
| 1FCC | AC | NC35A       | 2.364  |
| 1FCC | AC | TC25A       | 0.240  |
| 1FCC | AC | TC44A,YC45A | 1.953  |
| 1FCC | AC | WC43A       | 3.771  |
| 1FY8 | EI | DE168N      | 0.170  |
| 1GL0 | EI | MI28K       | -0.558 |
| 1GL0 | EI | MI28K,LI27R | 3.835  |
| 1GL1 | AI | KI30M,AI31G | -0.132 |
| 1GL1 | AI | LI29V       | 4.257  |
| 1H9D | AB | GB60A       | 1.902  |
| 1H9D | AB | LB93A       | 0.861  |
| 1H9D | AB | NB94A       | 2.110  |

|      |    |                   |       |
|------|----|-------------------|-------|
| 1H9D | AB | QB66A             | 1.249 |
| 1H9D | AB | RB2A              | 1.064 |
| 1H9D | AB | VB3A              | 1.284 |
| 1HE8 | AB | KA80V             | 0.467 |
| 1HE8 | AB | KA80V,FA78S       | 2.125 |
| 1HE8 | AB | KA80V,KA108A      | 2.125 |
| 1HE8 | AB | KA80V,KA108E      | 2.125 |
| 1HE8 | AB | KA80V,KA112A      | 2.125 |
| 1HE8 | AB | KA80V,KA91A       | 1.497 |
| 1HE8 | AB | KA80V,TA89D       | 2.125 |
| 1K8R | AB | DA33A             | 1.596 |
| 1K8R | AB | DA38A             | 1.780 |
| 1K8R | AB | DA38E             | 3.574 |
| 1K8R | AB | DA38N             | 1.972 |
| 1K8R | AB | EA37A             | 0.318 |
| 1K8R | AB | KB31A             | 2.837 |
| 1K8R | AB | QB11A             | 1.870 |
| 1K8R | AB | RA41A             | 1.227 |
| 1K8R | AB | RB13A             | 2.912 |
| 1K8R | AB | RB77A             | 1.494 |
| 1K8R | AB | SA39A             | 0.744 |
| 1K8R | AB | YA40C             | 3.574 |
| 1K8R | AB | YA40F             | 1.551 |
| 1KBH | AB | LA37W             | 0.679 |
| 1KBH | AB | QA3W              | 0.025 |
| 1KBH | AB | YB51W             | 0.314 |
| 1KBH | AB | YB51W,AA22G       | 0.695 |
| 1KBH | AB | YB51W,AB42G       | 0.695 |
| 1KBH | AB | YB51W,AB42G,AA22G | 1.600 |
| 1KBH | AB | YB51W,AB42G,IA28V | 2.037 |
| 1KBH | AB | YB51W,AB42G,IA34V | 2.171 |
| 1KBH | AB | YB51W,AB42G,LA10A | 2.535 |
| 1KBH | AB | YB51W,AB42G,LA16A | 2.026 |
| 1KBH | AB | YB51W,AB42G,LA9A  | 2.665 |
| 1KBH | AB | YB51W,AB42G,VA38A | 1.207 |
| 1KBH | AB | YB51W,IA28V       | 1.269 |
| 1KBH | AB | YB51W,IA34V       | 1.328 |
| 1KBH | AB | YB51W,IB44V       | 0.608 |
| 1KBH | AB | YB51W,IB44V,AA22G | 1.353 |
| 1KBH | AB | YB51W,IB44V,IA28V | 1.978 |
| 1KBH | AB | YB51W,IB44V,IA34V | 2.357 |
| 1KBH | AB | YB51W,IB44V,LA10A | 2.968 |
| 1KBH | AB | YB51W,IB44V,LA16A | 1.826 |
| 1KBH | AB | YB51W,IB44V,LA9A  | 2.439 |
| 1KBH | AB | YB51W,IB44V,VA38A | 1.022 |
| 1KBH | AB | YB51W,IB5V        | 0.812 |
| 1KBH | AB | YB51W,IB5V,IA28V  | 2.193 |
| 1KBH | AB | YB51W,IB5V,IA34V  | 2.120 |
| 1KBH | AB | YB51W,IB5V,LA10A  | 2.713 |
| 1KBH | AB | YB51W,IB5V,LA16A  | 2.048 |
| 1KBH | AB | YB51W,IB5V,LA9A   | 2.593 |
| 1KBH | AB | YB51W,IB5V,VA38A  | 1.326 |
| 1KBH | AB | YB51W,LA10A       | 1.990 |
| 1KBH | AB | YB51W,LA16A       | 1.078 |
| 1KBH | AB | YB51W,LA17A       | 2.838 |
| 1KBH | AB | YB51W,LA25A       | 2.158 |
| 1KBH | AB | YB51W,LA32A       | 2.793 |
| 1KBH | AB | YB51W,LA9A        | 1.690 |
| 1KBH | AB | YB51W,LB10A       | 0.096 |

|      |    |                     |        |
|------|----|---------------------|--------|
| 1KBH | AB | YB51W, LB10A, AA22G | 0.960  |
| 1KBH | AB | YB51W, LB10A, IA28V | 1.686  |
| 1KBH | AB | YB51W, LB10A, IA34V | 1.554  |
| 1KBH | AB | YB51W, LB10A, LA10A | 1.687  |
| 1KBH | AB | YB51W, LB10A, LA16A | 1.754  |
| 1KBH | AB | YB51W, LB10A, LA9A  | 1.346  |
| 1KBH | AB | YB51W, LB10A, VA38A | 0.579  |
| 1KBH | AB | YB51W, LB13A        | 0.747  |
| 1KBH | AB | YB51W, LB13A, AA22G | 2.382  |
| 1KBH | AB | YB51W, LB13A, IA28V | 2.347  |
| 1KBH | AB | YB51W, LB13A, IA34V | 2.363  |
| 1KBH | AB | YB51W, LB13A, LA10A | 2.218  |
| 1KBH | AB | YB51W, LB13A, LA16A | 2.645  |
| 1KBH | AB | YB51W, LB13A, LA9A  | 2.667  |
| 1KBH | AB | YB51W, LB17A        | 0.785  |
| 1KBH | AB | YB51W, LB17A, AA22G | 2.250  |
| 1KBH | AB | YB51W, LB17A, IA28V | 2.295  |
| 1KBH | AB | YB51W, LB17A, IA34V | 2.392  |
| 1KBH | AB | YB51W, LB17A, LA10A | 2.284  |
| 1KBH | AB | YB51W, LB17A, LA16A | 2.323  |
| 1KBH | AB | YB51W, LB17A, LA9A  | 2.625  |
| 1KBH | AB | YB51W, LB30A        | 2.979  |
| 1KBH | AB | YB51W, LB30A, AA22G | 3.264  |
| 1KBH | AB | YB51W, LB30A, IA28V | 3.598  |
| 1KBH | AB | YB51W, LB30A, IA34V | 3.557  |
| 1KBH | AB | YB51W, LB30A, LA16A | 3.417  |
| 1KBH | AB | YB51W, LB30A, LA9A  | 3.659  |
| 1KBH | AB | YB51W, LB30A, VA38A | 2.892  |
| 1KBH | AB | YB51W, LB39A        | 2.590  |
| 1KBH | AB | YB51W, LB39A, AA22G | 4.006  |
| 1KBH | AB | YB51W, LB39A, LA16A | 3.788  |
| 1KBH | AB | YB51W, LB39A, LA9A  | 4.271  |
| 1KBH | AB | YB51W, LB39A, VA38A | 3.153  |
| 1KBH | AB | YB51W, VA38A        | 0.393  |
| 1KBH | AB | YB51W, VB29A        | 1.381  |
| 1KBH | AB | YB51W, VB29A, AA22G | 2.347  |
| 1KBH | AB | YB51W, VB29A, IA28V | 3.150  |
| 1KBH | AB | YB51W, VB29A, IA34V | 2.838  |
| 1KBH | AB | YB51W, VB29A, LA10A | 3.449  |
| 1KBH | AB | YB51W, VB29A, LA16A | 2.779  |
| 1KBH | AB | YB51W, VB29A, LA9A  | 3.433  |
| 1KBH | AB | YB51W, VB29A, VA38A | 1.844  |
| 1KBH | AB | YB51W, VB52A        | 0.410  |
| 1KBH | AB | YB51W, VB52A, IA28V | 1.589  |
| 1KBH | AB | YB51W, VB52A, IA34V | 1.788  |
| 1KBH | AB | YB51W, VB52A, LA10A | 2.531  |
| 1KBH | AB | YB51W, VB52A, LA16A | 1.559  |
| 1KBH | AB | YB51W, VB52A, LA17A | 3.378  |
| 1KBH | AB | YB51W, VB52A, LA9A  | 2.080  |
| 1KBH | AB | YB51W, VB52A, VA38A | 0.953  |
| 1LFD | AB | DA38A               | -0.445 |
| 1LFD | AB | DA38A, DB33A        | 0.200  |
| 1LFD | AB | DA38K               | -0.994 |
| 1LFD | AB | DB33A               | 1.100  |
| 1LFD | AB | DB38A               | 3.311  |
| 1LFD | AB | EB37A               | 1.196  |
| 1LFD | AB | IA5A                | 1.449  |
| 1LFD | AB | KA19A               | 1.955  |
| 1LFD | AB | KA19A, QB25A        | 2.500  |

|      |    |                   |        |
|------|----|-------------------|--------|
| 1LFD | AB | KA39A             | 2.144  |
| 1LFD | AB | KA39A,DB38A       | 6.095  |
| 1LFD | AB | MA17K             | -0.661 |
| 1LFD | AB | NA14A             | 0.949  |
| 1LFD | AB | NA14A,EB37A       | 1.996  |
| 1LFD | AB | NA14A,RB41A       | 1.548  |
| 1LFD | AB | NA14K             | 0.400  |
| 1LFD | AB | NA16A             | 0.499  |
| 1LFD | AB | NA16A,QB25A       | 0.302  |
| 1LFD | AB | NA16A,RB41A       | 1.099  |
| 1LFD | AB | NA16A,SB39A       | 0.000  |
| 1LFD | AB | NA16A,YB40F       | 2.300  |
| 1LFD | AB | NA41K             | -0.634 |
| 1LFD | AB | QB25A             | 0.900  |
| 1LFD | AB | RA7A              | 1.832  |
| 1LFD | AB | RA7A,EB37A        | 2.097  |
| 1LFD | AB | RB41A             | 0.849  |
| 1LFD | AB | SA20A             | 0.949  |
| 1LFD | AB | SA20A,DB38A       | 3.296  |
| 1LFD | AB | SA20A,EB37A       | 2.296  |
| 1LFD | AB | SA20A,YB40F       | 1.798  |
| 1LFD | AB | SB39A             | -0.751 |
| 1LFD | AB | YA18A             | 3.596  |
| 1LFD | AB | YA18A,DB38A       | 4.895  |
| 1LFD | AB | YA18A,EB37A       | 3.596  |
| 1LFD | AB | YA18A,SB39A       | 4.095  |
| 1LFD | AB | YA18F             | 1.348  |
| 1LFD | AB | YA18F,EB37A       | 1.297  |
| 1LFD | AB | YA18F,RB41A       | 1.798  |
| 1LFD | AB | YA18F,SB39A       | 0.800  |
| 1LFD | AB | YA18F,YB40F       | 2.600  |
| 1LFD | AB | YB40A             | 3.696  |
| 1LFD | AB | YB40F             | 2.148  |
| 1PPF | EI | AI15C             | -0.664 |
| 1PPF | EI | AI15D             | 1.122  |
| 1PPF | EI | AI15D,GI32A       | 1.143  |
| 1PPF | EI | AI15D,LI18A,YI20D | 8.616  |
| 1PPF | EI | AI15E             | 0.104  |
| 1PPF | EI | AI15F             | -0.072 |
| 1PPF | EI | AI15G             | 1.122  |
| 1PPF | EI | AI15H             | 0.545  |
| 1PPF | EI | AI15I             | 0.325  |
| 1PPF | EI | AI15K             | 1.112  |
| 1PPF | EI | AI15L             | 0.018  |
| 1PPF | EI | AI15M             | -0.396 |
| 1PPF | EI | AI15N             | 0.903  |
| 1PPF | EI | AI15P             | 1.968  |
| 1PPF | EI | AI15Q             | 0.246  |
| 1PPF | EI | AI15R             | -0.261 |
| 1PPF | EI | AI15R,LI18R       | 7.226  |
| 1PPF | EI | AI15S             | 0.746  |
| 1PPF | EI | AI15T             | 0.949  |
| 1PPF | EI | AI15T,LI18M       | -1.472 |
| 1PPF | EI | AI15V             | 0.198  |
| 1PPF | EI | AI15V,TI17S       | 1.741  |
| 1PPF | EI | AI15W             | -0.632 |
| 1PPF | EI | AI15Y             | -0.182 |
| 1PPF | EI | EI19A             | 1.187  |
| 1PPF | EI | EI19C             | 1.383  |

|      |    |                   |        |
|------|----|-------------------|--------|
| 1PPF | EI | EI19D             | 0.570  |
| 1PPF | EI | EI19F             | 1.345  |
| 1PPF | EI | EI19G             | 2.091  |
| 1PPF | EI | EI19H             | 0.681  |
| 1PPF | EI | EI19I             | 0.713  |
| 1PPF | EI | EI19K             | 2.091  |
| 1PPF | EI | EI19L             | 1.056  |
| 1PPF | EI | EI19M             | 1.133  |
| 1PPF | EI | EI19N             | 1.196  |
| 1PPF | EI | EI19P             | 3.166  |
| 1PPF | EI | EI19Q             | 0.651  |
| 1PPF | EI | EI19R             | 1.461  |
| 1PPF | EI | EI19S             | 1.821  |
| 1PPF | EI | EI19T             | 1.484  |
| 1PPF | EI | EI19V             | 1.143  |
| 1PPF | EI | EI19W             | 1.509  |
| 1PPF | EI | EI19Y             | 1.232  |
| 1PPF | EI | GI32A             | 0.254  |
| 1PPF | EI | GI32C             | 1.163  |
| 1PPF | EI | GI32D             | 2.462  |
| 1PPF | EI | GI32E             | 1.437  |
| 1PPF | EI | GI32F             | 1.461  |
| 1PPF | EI | GI32H             | 1.484  |
| 1PPF | EI | GI32I             | 4.311  |
| 1PPF | EI | GI32K             | 3.260  |
| 1PPF | EI | GI32L             | 3.086  |
| 1PPF | EI | GI32M             | 2.165  |
| 1PPF | EI | GI32N             | 1.591  |
| 1PPF | EI | GI32P             | 0.260  |
| 1PPF | EI | GI32Q             | 2.761  |
| 1PPF | EI | GI32R             | 4.781  |
| 1PPF | EI | GI32S             | 0.903  |
| 1PPF | EI | GI32T             | 2.773  |
| 1PPF | EI | GI32V             | 2.513  |
| 1PPF | EI | GI32W             | 1.621  |
| 1PPF | EI | GI32Y             | 1.187  |
| 1PPF | EI | LI18A             | 1.002  |
| 1PPF | EI | LI18C             | -0.088 |
| 1PPF | EI | LI18D             | 7.508  |
| 1PPF | EI | LI18E             | 6.965  |
| 1PPF | EI | LI18F             | 5.098  |
| 1PPF | EI | LI18G             | 3.287  |
| 1PPF | EI | LI18H             | 6.381  |
| 1PPF | EI | LI18I             | -0.723 |
| 1PPF | EI | LI18I,GI32D       | 2.488  |
| 1PPF | EI | LI18K             | 5.614  |
| 1PPF | EI | LI18M             | 1.224  |
| 1PPF | EI | LI18M,GI32D       | 3.930  |
| 1PPF | EI | LI18M,TI30S,GI32D | 4.118  |
| 1PPF | EI | LI18M,YI20Q       | 5.758  |
| 1PPF | EI | LI18N             | 5.153  |
| 1PPF | EI | LI18P             | 6.062  |
| 1PPF | EI | LI18Q             | 3.301  |
| 1PPF | EI | LI18R             | 7.085  |
| 1PPF | EI | LI18S             | 3.049  |
| 1PPF | EI | LI18T             | 0.903  |
| 1PPF | EI | LI18V             | -0.486 |
| 1PPF | EI | LI18W             | 7.439  |
| 1PPF | EI | LI18Y             | 6.543  |

|      |    |       |        |
|------|----|-------|--------|
| 1PPF | EI | NI36A | -1.623 |
| 1PPF | EI | NI36C | 0.596  |
| 1PPF | EI | NI36D | -3.035 |
| 1PPF | EI | NI36E | -1.004 |
| 1PPF | EI | NI36F | 1.821  |
| 1PPF | EI | NI36G | -0.564 |
| 1PPF | EI | NI36H | -0.526 |
| 1PPF | EI | NI36I | 0.859  |
| 1PPF | EI | NI36K | 2.585  |
| 1PPF | EI | NI36L | 2.610  |
| 1PPF | EI | NI36M | 1.056  |
| 1PPF | EI | NI36P | -2.918 |
| 1PPF | EI | NI36Q | 0.378  |
| 1PPF | EI | NI36R | 1.844  |
| 1PPF | EI | NI36S | -1.328 |
| 1PPF | EI | NI36T | 0.545  |
| 1PPF | EI | NI36V | 0.341  |
| 1PPF | EI | NI36W | 1.698  |
| 1PPF | EI | NI36Y | 1.654  |
| 1PPF | EI | PI14A | -0.122 |
| 1PPF | EI | PI14C | -1.977 |
| 1PPF | EI | PI14D | -0.486 |
| 1PPF | EI | PI14E | -1.409 |
| 1PPF | EI | PI14F | -1.831 |
| 1PPF | EI | PI14G | 0.092  |
| 1PPF | EI | PI14H | -1.741 |
| 1PPF | EI | PI14I | -1.628 |
| 1PPF | EI | PI14K | -0.442 |
| 1PPF | EI | PI14L | -2.883 |
| 1PPF | EI | PI14M | -1.553 |
| 1PPF | EI | PI14N | -0.632 |
| 1PPF | EI | PI14Q | -0.800 |
| 1PPF | EI | PI14R | -0.136 |
| 1PPF | EI | PI14S | -0.564 |
| 1PPF | EI | PI14T | -0.261 |
| 1PPF | EI | PI14V | -1.504 |
| 1PPF | EI | PI14W | -1.977 |
| 1PPF | EI | PI14Y | -0.949 |
| 1PPF | EI | RI21A | 0.205  |
| 1PPF | EI | RI21C | -0.080 |
| 1PPF | EI | RI21D | 0.205  |
| 1PPF | EI | RI21E | 0.454  |
| 1PPF | EI | RI21F | -0.968 |
| 1PPF | EI | RI21G | 0.570  |
| 1PPF | EI | RI21H | -0.486 |
| 1PPF | EI | RI21I | -0.800 |
| 1PPF | EI | RI21K | 0.596  |
| 1PPF | EI | RI21L | -0.847 |
| 1PPF | EI | RI21M | -0.749 |
| 1PPF | EI | RI21N | 0.325  |
| 1PPF | EI | RI21P | 6.612  |
| 1PPF | EI | RI21Q | -0.018 |
| 1PPF | EI | RI21S | 0.414  |
| 1PPF | EI | RI21T | -0.018 |
| 1PPF | EI | RI21V | -0.345 |
| 1PPF | EI | RI21W | -0.526 |
| 1PPF | EI | RI21Y | 0.218  |
| 1PPF | EI | TI17A | 3.145  |
| 1PPF | EI | TI17C | 2.058  |

|      |    |       |        |
|------|----|-------|--------|
| 1PPF | EI | TI17D | 4.855  |
| 1PPF | EI | TI17E | 3.015  |
| 1PPF | EI | TI17F | 1.686  |
| 1PPF | EI | TI17G | 3.550  |
| 1PPF | EI | TI17H | 1.670  |
| 1PPF | EI | TI17I | 1.461  |
| 1PPF | EI | TI17K | 3.342  |
| 1PPF | EI | TI17L | 2.248  |
| 1PPF | EI | TI17M | 2.468  |
| 1PPF | EI | TI17N | 2.661  |
| 1PPF | EI | TI17P | 3.031  |
| 1PPF | EI | TI17Q | 1.941  |
| 1PPF | EI | TI17R | 3.404  |
| 1PPF | EI | TI17S | 1.510  |
| 1PPF | EI | TI17V | 1.492  |
| 1PPF | EI | TI17W | 2.165  |
| 1PPF | EI | TI17Y | 2.446  |
| 1PPF | EI | YI20A | 3.166  |
| 1PPF | EI | YI20C | 3.404  |
| 1PPF | EI | YI20D | 6.330  |
| 1PPF | EI | YI20E | 6.330  |
| 1PPF | EI | YI20F | 0.475  |
| 1PPF | EI | YI20G | 4.128  |
| 1PPF | EI | YI20H | 2.383  |
| 1PPF | EI | YI20I | 3.877  |
| 1PPF | EI | YI20K | 4.432  |
| 1PPF | EI | YI20L | 1.356  |
| 1PPF | EI | YI20M | 2.773  |
| 1PPF | EI | YI20N | 3.593  |
| 1PPF | EI | YI20P | 5.292  |
| 1PPF | EI | YI20Q | 4.632  |
| 1PPF | EI | YI20R | 4.311  |
| 1PPF | EI | YI20S | 3.593  |
| 1PPF | EI | YI20T | 4.985  |
| 1PPF | EI | YI20V | 4.128  |
| 1PPF | EI | YI20W | 0.232  |
| 1S1Q | AB | DA44A | 0.949  |
| 1S1Q | AB | FA42A | 0.196  |
| 1S1Q | AB | FA86A | 0.762  |
| 1S1Q | AB | NA43A | 1.211  |
| 1S1Q | AB | VA41A | 0.659  |
| 1SMF | EI | EI8A  | 1.019  |
| 1SMF | EI | II5A  | 3.533  |
| 1SMF | EI | KI3A  | 5.724  |
| 1SMF | EI | SI4A  | 1.912  |
| 1SMF | EI | TI2A  | 2.059  |
| 1UUZ | AD | CA64A | 0.651  |
| 1UUZ | AD | HA62A | 1.774  |
| 1UUZ | AD | HA62D | 3.378  |
| 1UUZ | AD | HA62N | 1.519  |
| 1UUZ | AD | HA62Q | 1.519  |
| 1WQJ | IB | RI20A | 0.679  |
| 1X1X | AD | AD76E | -0.823 |
| 1XD3 | AB | DB39A | -0.420 |
| 1XD3 | AB | HB68N | 0.000  |
| 1XD3 | AB | IB44A | 0.272  |
| 1XD3 | AB | KB11R | 1.435  |
| 1XD3 | AB | LB8A  | 2.738  |
| 1XD3 | AB | RB42L | -0.882 |

|      |    |                      |        |
|------|----|----------------------|--------|
| 1XD3 | AB | RB72L                | 1.332  |
| 1XD3 | AB | RB74L                | 2.432  |
| 1Z7X | WX | DW435A               | 3.661  |
| 1Z7X | WX | EW287A               | 1.321  |
| 1Z7X | WX | EW401A               | 1.306  |
| 1Z7X | WX | IW459A               | 0.337  |
| 1Z7X | WX | KW320A               | 1.321  |
| 1Z7X | WX | QW430A,VW432A        | 0.939  |
| 1Z7X | WX | RW457A               | 0.848  |
| 1Z7X | WX | SW289A               | 0.814  |
| 1Z7X | WX | WW261A               | 1.335  |
| 1Z7X | WX | WW263A               | 2.211  |
| 1Z7X | WX | WW318A               | 0.993  |
| 1Z7X | WX | WW375A               | 1.669  |
| 1Z7X | WX | WW438A,SW439A,EW440A | 1.971  |
| 1Z7X | WX | YW434A               | 5.953  |
| 1Z7X | WX | YW434A,DW435A        | 7.168  |
| 1Z7X | WX | YW434A,YW437A        | 7.237  |
| 1Z7X | WX | YW434F               | 0.121  |
| 1Z7X | WX | YW437A               | 2.623  |
| 1Z7X | WX | YW437F               | 2.165  |
| 2AW2 | AB | PB16A                | 2.574  |
| 2AW2 | AB | VB35A                | 1.096  |
| 2AW2 | AB | YB22A                | 1.884  |
| 2C5D | AC | EC33R,TC51R          | 6.110  |
| 2C5D | AC | VC66A                | -0.599 |
| 2FTL | EI | GI12A                | 4.346  |
| 2FTL | EI | GI36A                | 4.891  |
| 2FTL | EI | GI37A                | 4.049  |
| 2FTL | EI | II18A                | 4.969  |
| 2FTL | EI | II19A                | 4.049  |
| 2FTL | EI | PI13A                | 4.049  |
| 2FTL | EI | RI17A                | 4.049  |
| 2FTL | EI | RI39A                | 4.049  |
| 2FTL | EI | TI11A                | 4.049  |
| 2FTL | EI | VI34A                | 4.049  |
| 2HRK | AB | KA140A               | 0.953  |
| 2HRK | AB | TA108V               | 0.721  |
| 2HRK | AB | TB55V                | 0.624  |
| 2I26 | NL | AN29V                | 0.030  |
| 2KSO | AB | HB20E                | -0.155 |
| 2KSO | AB | KA10D                | 0.331  |
| 2KSO | AB | KA10D,DB25K          | 0.387  |
| 2KSO | AB | KA49D                | 1.340  |
| 2KSO | AB | KA49D,DB36K          | 0.176  |
| 2KSO | AB | KA49E                | 1.340  |
| 2KSO | AB | RA43E                | -0.662 |
| 2KSO | AB | RA43E,HB20E          | 0.454  |
| 2KSO | AB | RA43E,HB20R          | -0.821 |
| 2O3B | AB | DB75E                | 5.435  |
| 2O3B | AB | DB75N                | 5.900  |
| 2O3B | AB | EB24A                | 5.472  |
| 2O3B | AB | EB24D                | 0.599  |
| 2O3B | AB | EB24Q                | 5.396  |
| 2O3B | AB | WB76A                | 4.072  |
| 2OOB | AB | AA9E                 | 3.102  |
| 2OOB | AB | AA9E,GA13S           | 3.102  |
| 2OOB | AB | GA13S                | 0.235  |
| 3EG5 | AB | HA104F               | -2.049 |



|      |    |                          |        |
|------|----|--------------------------|--------|
| 3EG5 | AB | TB73N,SB74N,HB75N        | 1.035  |
| 3EG5 | AB | TB73N,SB74N,HB75N,HA104F | -1.304 |
| 3EQS | AB | FB3A                     | 5.556  |
| 3EQS | AB | LB10A                    | 3.333  |
| 3EQS | AB | LB9A                     | -0.170 |
| 3EQS | AB | NB8A                     | -1.111 |
| 3EQS | AB | SB11A                    | 0.117  |
| 3EQS | AB | SB2A                     | 1.263  |
| 3EQS | AB | TB1A                     | 0.392  |
| 3EQS | AB | WB7A                     | 6.407  |
| 3EQS | AB | YB6A                     | 3.109  |
| 3EQY | AC | FC3A                     | 5.658  |
| 3EQY | AC | LC10A                    | 2.323  |
| 3EQY | AC | PC12A                    | 0.295  |
| 3EQY | AC | SC11A                    | 0.153  |
| 3EQY | AC | SC2A                     | 0.871  |
| 3EQY | AC | TC1A                     | 0.375  |
| 3EQY | AC | WC7A                     | 6.043  |
| 3EQY | AC | YC6A                     | 2.586  |
| 3KUD | AB | KB30A                    | 1.953  |
| 3KUD | AB | KB30A,VB33I              | 2.758  |
| 3SF4 | AD | ED19R                    | 1.925  |
| 3SF4 | AD | KD27D                    | 0.410  |
| 3SF4 | AD | NA264R                   | 1.225  |
| 3SF4 | AD | RA202E                   | 2.364  |
| 3SF4 | AD | WD8A                     | 3.072  |
| 3TGK | EI | NE170D                   | -0.170 |
| 3U82 | AB | IB45A                    | 2.595  |
| 3U82 | AB | TB28A,QB29A,EB90A,NB98A  | -1.010 |
| 4G0N | AB | DA33A                    | 0.895  |
| 4G0N | AB | DA38A                    | 2.917  |
| 4G0N | AB | EA31A                    | 0.945  |
| 4G0N | AB | EA37A                    | 1.801  |
| 4G0N | AB | IA21A                    | 0.900  |
| 4G0N | AB | IA36A                    | 1.801  |
| 4G0N | AB | KB12A                    | 1.831  |
| 4G0N | AB | KB12E                    | 1.916  |
| 4G0N | AB | KB12M                    | 1.322  |
| 4G0N | AB | KB31A                    | 2.607  |
| 4G0N | AB | KB31A,DA33A              | 2.700  |
| 4G0N | AB | KB31A,EA31A              | 2.100  |
| 4G0N | AB | KB31A,EA37A              | 3.499  |
| 4G0N | AB | KB31A,RB36G              | 5.356  |
| 4G0N | AB | KB31E                    | 5.063  |
| 4G0N | AB | NB11A                    | 0.681  |
| 4G0N | AB | NB11A,RA41A              | -0.600 |
| 4G0N | AB | NB11D                    | 1.808  |
| 4G0N | AB | QB13A                    | 2.242  |
| 4G0N | AB | QB13A,RA41A              | 1.300  |
| 4G0N | AB | QB13A,SA39A              | 2.100  |
| 4G0N | AB | RA41A                    | -0.354 |
| 4G0N | AB | RB14A                    | 1.941  |
| 4G0N | AB | RB14A,SA39A              | 2.300  |
| 4G0N | AB | RB36L                    | 5.356  |
| 4G0N | AB | RB6A                     | 2.158  |
| 4G0N | AB | RB6A,DA33A               | 2.600  |
| 4G0N | AB | RB6A,DA38A               | 4.599  |
| 4G0N | AB | RB6A,EA31A               | 2.200  |
| 4G0N | AB | RB6A,EA37A               | 2.400  |

|      |    |                          |        |
|------|----|--------------------------|--------|
| 4G0N | AB | RB6A,IA36A               | 4.398  |
| 4G0N | AB | RB6A,NB11D               | 3.419  |
| 4G0N | AB | SA39A                    | 0.300  |
| 4G0N | AB | TB15A                    | 1.829  |
| 4G0N | AB | TB15A,DA38A              | 3.100  |
| 4G0N | AB | TB15A,EA31A              | 1.603  |
| 4G0N | AB | TB15A,EA37A              | 2.900  |
| 4G0N | AB | TB15A,IA21A              | 2.200  |
| 4G0N | AB | TB15A,IA36A              | 3.100  |
| 4G0N | AB | TB15A,SA39A              | 2.001  |
| 4G0N | AB | VB16A                    | 1.166  |
| 4G0N | AB | VB16A,EA37A              | 2.800  |
| 4G0N | AB | VB16A,IA21A              | 1.603  |
| 4G0N | AB | VB16A,IA36A              | 2.700  |
| 4G0N | AB | VB35A                    | -0.004 |
| 4G0N | AB | VB35A,IA21A              | 0.300  |
| 4G0N | AB | VB35I                    | 0.552  |
| 4G2V | AB | RA198E                   | 2.236  |
| 4KRL | AB | DA49T,FA51A              | 1.852  |
| 4KRL | AB | DB112A                   | 0.650  |
| 4KRL | AB | RB30A                    | 1.720  |
| 4KRO | AB | DB92A                    | 1.504  |
| 4KRO | AB | RB15A                    | 1.583  |
| 4KRP | AB | EB105A                   | 1.606  |
| 4MYW | AB | IB48A                    | 2.572  |
| 4MYW | AB | TB31A,QB32A,EB93A,NB101A | -0.530 |
| 4RA0 | AC | AC66V                    | 0.931  |
| 4RS1 | AB | DA28A                    | 2.591  |
| 4RS1 | AB | DA28K                    | 3.618  |
| 4RS1 | AB | DA28K,DA92K              | 4.121  |
| 4RS1 | AB | DA92A                    | 1.865  |
| 4RS1 | AB | DA92K                    | 3.476  |
| 4RS1 | AB | DA92N                    | 1.329  |
| 4RS1 | AB | DA92R                    | 2.908  |
| 4RS1 | AB | EA25A                    | 1.502  |
| 4RS1 | AB | EA25K                    | 2.139  |
| 4RS1 | AB | EA25K,DA28K              | 4.121  |
| 4RS1 | AB | EA25K,DA92K              | 4.121  |
| 4RS1 | AB | FA99A                    | 3.625  |
| 4RS1 | AB | KB174A                   | 0.871  |
| 4RS1 | AB | KB203A                   | 0.276  |
| 4RS1 | AB | LA95A                    | 2.364  |
| 4RS1 | AB | LA95A,FA99A              | 4.121  |
| 4RS1 | AB | LB204A                   | 0.072  |
| 4RS1 | AB | QA79A                    | 0.470  |
| 4RS1 | AB | QA79E                    | 1.212  |
| 4RS1 | AB | RA10D                    | 0.178  |
| 4RS1 | AB | SB205A                   | 0.616  |
| 4WND | AB | NA263R                   | -0.021 |
| 4WND | AB | RA201E                   | 2.794  |
| 4WND | AB | RA201E,NA263R            | 3.855  |
| 4YEB | AB | FB131A                   | 2.416  |
| 5CXB | AB | EB49D                    | 0.365  |
| 5CXB | AB | RB54A                    | 0.564  |
| 5CXB | AB | RB54E                    | 2.679  |
| 5CXB | AB | TB52Q                    | 0.062  |
| 5CXB | AB | VB56W                    | 0.564  |
| 5CYK | AB | EB52A                    | -2.115 |
| 5CYK | AB | EB52R                    | -2.679 |

|      |    |               |        |
|------|----|---------------|--------|
| 5CYK | AB | EB52R,EB47D   | -2.314 |
| 5CYK | AB | EB52R,TB50Q   | -2.617 |
| 5CYK | AB | EB52R,VB54W   | -2.115 |
| 5F4E | AB | EA50A         | 0.283  |
| 5F4E | AB | EA50K         | 0.408  |
| 5F4E | AB | EB26A         | 1.424  |
| 5F4E | AB | EB26K         | 2.247  |
| 5F4E | AB | HA136A        | 1.990  |
| 5F4E | AB | KB139A        | 0.289  |
| 5F4E | AB | KB139E        | 0.478  |
| 5F4E | AB | LB62A         | 2.934  |
| 5F4E | AB | RA139A        | 1.465  |
| 5F4E | AB | RA139E        | 2.107  |
| 5F4E | AB | WB43A         | 1.055  |
| 5TAR | AB | EB86A         | 1.126  |
| 5TAR | AB | QB114A        | 0.157  |
| 5TAR | AB | TA183A,KA184E | 2.730  |
| 5TAR | AB | WB88A         | 0.384  |
| 5UFE | AB | QB25R         | 0.292  |
| 5UFQ | AC | QC25R,KC55G   | 0.246  |
| 5XCO | AB | DB12A         | 2.796  |
| 5XCO | AB | IB9A          | 2.796  |
| 5XCO | AB | LB7A          | 2.747  |
| 5XCO | AB | PB6A          | 1.078  |
| 5XCO | AB | SB10A         | 1.285  |
| 5XCO | AB | VB14A         | 0.000  |
| 5XCO | AB | YB11A         | 1.899  |
| 5XCO | AB | YB8A          | 1.363  |

**Table S8.** Experimental data for TestSet2. The multi-chain complexes were split into dimers and only the mutations at the interfaces of the split dimers are listed.

| PDB  | Chains | Mutations                   | Experimental $\Delta\Delta G_{bind}$ |
|------|--------|-----------------------------|--------------------------------------|
| 1AHW | AC     | DC167A                      | -0.485                               |
| 1AHW | AC     | TC159A                      | 1.106                                |
| 1AHW | BC     | RC189A,KC190A               | 4.016                                |
| 1AHW | BC     | TC186A                      | 1.346                                |
| 1AHW | BC     | VC187A                      | -0.314                               |
| 1AHW | BC     | YC145A                      | 3.805                                |
| 1AO7 | AC     | EA63A                       | 0.158                                |
| 1AO7 | AC     | HA70A                       | 3.154                                |
| 1AO7 | AC     | KA146A                      | 0.462                                |
| 1AO7 | AC     | TA80A                       | 0.076                                |
| 1AO7 | AC     | VA67A                       | -0.558                               |
| 1AO7 | AC     | VA76A                       | 0.597                                |
| 1AO7 | AD     | AA158G                      | 0.312                                |
| 1AO7 | AD     | DD26A                       | 0.979                                |
| 1AO7 | AD     | DD26A,EA58A                 | 0.749                                |
| 1AO7 | AD     | DD26M                       | 0.211                                |
| 1AO7 | AD     | DD26V                       | 1.363                                |
| 1AO7 | AD     | DD26W                       | -1.080                               |
| 1AO7 | AD     | EA154A                      | 0.361                                |
| 1AO7 | AD     | EA166A                      | 2.199                                |
| 1AO7 | AD     | EA58A                       | -0.487                               |
| 1AO7 | AD     | KA68A                       | 0.193                                |
| 1AO7 | AD     | KD66A                       | 1.211                                |
| 1AO7 | AD     | KD66A,EA166A                | 3.032                                |
| 1AO7 | AD     | KD66H                       | 0.953                                |
| 1AO7 | AD     | ND52A                       | 0.355                                |
| 1AO7 | AD     | ND52A,EA166A                | 3.142                                |
| 1AO7 | AD     | RA170A                      | -0.077                               |
| 1AO7 | AD     | RA65A                       | 3.042                                |
| 1AO7 | AD     | RD27A                       | 0.490                                |
| 1AO7 | AD     | RD27A,RA170A                | 1.186                                |
| 1AO7 | AD     | RD27F                       | -0.199                               |
| 1AO7 | AD     | RD27P                       | 0.308                                |
| 1AO7 | AD     | SD51M                       | -0.378                               |
| 1AO7 | AE     | AA149G                      | -0.154                               |
| 1AO7 | AE     | HA151A                      | -0.302                               |
| 1AO7 | CE     | EE28A                       | 2.021                                |
| 1AO7 | DE     | KD97P                       | -0.268                               |
| 1BD2 | AD     | ED93A                       | 1.315                                |
| 1BJ1 | HW     | HH101Y                      | -1.584                               |
| 1BJ1 | HW     | HH101Y,SH105T               | -1.343                               |
| 1BJ1 | HW     | HH101Y,YH103I,GH104A,SH105K | -0.431                               |
| 1BJ1 | HW     | HH101Y,YH103R,GH104D,SH105N | -0.995                               |
| 1BJ1 | HW     | HH101Y,YH103R,GH104N,SH105T | -0.763                               |
| 1BJ1 | HW     | HH101Y,YH103R,SH105T        | -1.173                               |
| 1BJ1 | HW     | HH101Y,YH103W,SH105T        | -1.041                               |
| 1BJ1 | HW     | SH105T                      | -0.390                               |
| 1BJ1 | HW     | TH59A                       | 0.851                                |
| 1C4Z | AD     | AD56G                       | 0.566                                |
| 1C4Z | AD     | AD95G                       | 0.410                                |
| 1C4Z | AD     | DA145A                      | -0.387                               |
| 1C4Z | AD     | DA145K                      | 0.208                                |
| 1C4Z | AD     | DA156A                      | 0.518                                |
| 1C4Z | AD     | DA156R                      | 1.375                                |
| 1C4Z | AD     | ED57A                       | 0.088                                |
| 1C4Z | AD     | ED57R                       | 0.067                                |

|      |    |        |        |
|------|----|--------|--------|
| 1C4Z | AD | FA194A | 1.596  |
| 1C4Z | AD | FD60A  | 3.013  |
| 1C4Z | AD | IA159A | 0.410  |
| 1C4Z | AD | KD61A  | 0.293  |
| 1C4Z | AD | KD61E  | 0.725  |
| 1C4Z | AD | KD6A   | 0.610  |
| 1C4Z | AD | KD6E   | 1.554  |
| 1C4Z | AD | KD93A  | 1.135  |
| 1C4Z | AD | KD93E  | 1.169  |
| 1C4Z | AD | KD97A  | 1.301  |
| 1C4Z | AD | KD97E  | 1.420  |
| 1C4Z | AD | LA139A | 1.216  |
| 1C4Z | AD | LA143A | 0.999  |
| 1C4Z | AD | LD30A  | -0.343 |
| 1C4Z | AD | MA157A | 1.929  |
| 1C4Z | AD | MA158A | 0.759  |
| 1C4Z | AD | MA174A | -0.573 |
| 1C4Z | AD | PD59A  | 1.409  |
| 1C4Z | AD | PD94A  | 0.850  |
| 1C4Z | AD | QA141A | -0.387 |
| 1C4Z | AD | RD2A   | 0.518  |
| 1C4Z | AD | RD2E   | 1.288  |
| 1C4Z | AD | RD3A   | 0.467  |
| 1C4Z | AD | RD3E   | 1.185  |
| 1C4Z | AD | SA142A | 0.410  |
| 1C4Z | AD | SA164A | -0.410 |
| 1C4Z | AD | SD1A   | 0.566  |
| 1C4Z | AD | TA160A | 0.566  |
| 1C4Z | AD | TA166A | -0.132 |
| 1C4Z | AD | VA138A | 0.566  |
| 1C4Z | AD | WD92A  | 0.821  |
| 1C4Z | AD | YA198L | 0.821  |
| 1CBW | GI | GI37A  | 0.803  |
| 1CBW | GI | II19A  | 0.120  |
| 1CBW | GI | RI39A  | 0.209  |
| 1CBW | HI | GI12A  | 0.637  |
| 1CHO | FI | RI18A  | 3.147  |
| 1CHO | FI | RI18C  | 3.471  |
| 1CHO | FI | RI18D  | 3.730  |
| 1CHO | FI | RI18E  | 3.471  |
| 1CHO | FI | RI18F  | 2.912  |
| 1CHO | FI | RI18G  | 3.438  |
| 1CHO | FI | RI18H  | 2.755  |
| 1CHO | FI | RI18I  | 2.080  |
| 1CHO | FI | RI18K  | 0.654  |
| 1CHO | FI | RI18L  | 2.791  |
| 1CHO | FI | RI18M  | 2.579  |
| 1CHO | FI | RI18N  | 3.471  |
| 1CHO | FI | RI18P  | 7.188  |
| 1CHO | FI | RI18Q  | 2.444  |
| 1CHO | FI | RI18S  | 3.142  |
| 1CHO | FI | RI18T  | 2.632  |
| 1CHO | FI | RI18V  | 2.037  |
| 1CHO | FI | RI18W  | 2.405  |
| 1CHO | FI | RI18Y  | 2.959  |
| 1CHO | GI | AI12C  | -0.322 |
| 1CHO | GI | AI12D  | 0.000  |
| 1CHO | GI | AI12E  | 0.222  |
| 1CHO | GI | AI12F  | -0.725 |

|      |    |                   |        |
|------|----|-------------------|--------|
| 1CHO | GI | AI12G             | 0.065  |
| 1CHO | GI | AI12H             | -0.322 |
| 1CHO | GI | AI12I             | 0.646  |
| 1CHO | GI | AI12K             | 2.464  |
| 1CHO | GI | AI12L             | 0.139  |
| 1CHO | GI | AI12M             | 0.139  |
| 1CHO | GI | AI12N             | -0.285 |
| 1CHO | GI | AI12P             | 3.066  |
| 1CHO | GI | AI12Q             | 0.436  |
| 1CHO | GI | AI12R             | 0.462  |
| 1CHO | GI | AI12S             | 0.065  |
| 1CHO | GI | AI12T             | 0.956  |
| 1CHO | GI | AI12V             | 0.925  |
| 1CHO | GI | AI12W             | -1.899 |
| 1CHO | GI | AI12Y             | -0.863 |
| 1CHO | GI | KI10A             | 0.179  |
| 1CHO | GI | KI10C             | 0.496  |
| 1CHO | GI | KI10D             | -0.504 |
| 1CHO | GI | KI10E             | 0.179  |
| 1CHO | GI | KI10F             | 1.078  |
| 1CHO | GI | KI10G             | 1.797  |
| 1CHO | GI | KI10H             | 0.139  |
| 1CHO | GI | KI10I             | 1.524  |
| 1CHO | GI | KI10L             | 0.375  |
| 1CHO | GI | KI10M             | 0.420  |
| 1CHO | GI | KI10N             | -0.356 |
| 1CHO | GI | KI10P             | 2.047  |
| 1CHO | GI | KI10Q             | -0.565 |
| 1CHO | GI | KI10R             | -0.373 |
| 1CHO | GI | KI10S             | -0.421 |
| 1CHO | GI | KI10S,PI11D,AI12Y | -1.022 |
| 1CHO | GI | KI10T             | 0.375  |
| 1CHO | GI | KI10T,PI11E,AI12Y | -0.932 |
| 1CHO | GI | KI10V             | 1.185  |
| 1CHO | GI | KI10W             | 1.005  |
| 1CHO | GI | KI10Y             | 1.060  |
| 1CHO | GI | PI11A             | 0.375  |
| 1CHO | GI | PI11C             | -0.970 |
| 1CHO | GI | PI11D             | -0.839 |
| 1CHO | GI | PI11E             | -0.710 |
| 1CHO | GI | PI11F             | -0.303 |
| 1CHO | GI | PI11G             | 0.628  |
| 1CHO | GI | PI11H             | -0.111 |
| 1CHO | GI | PI11I             | -0.504 |
| 1CHO | GI | PI11K             | 0.381  |
| 1CHO | GI | PI11L             | -0.517 |
| 1CHO | GI | PI11M             | -0.817 |
| 1CHO | GI | PI11N             | -0.769 |
| 1CHO | GI | PI11Q             | -0.718 |
| 1CHO | GI | PI11R             | 0.393  |
| 1CHO | GI | PI11S             | -0.435 |
| 1CHO | GI | PI11T             | -0.542 |
| 1CHO | GI | PI11V             | -0.542 |
| 1CHO | GI | PI11W             | -0.206 |
| 1CHO | GI | PI11Y             | -0.390 |
| 1DAN | HT | DT39A             | 1.438  |
| 1DAN | HT | GT38A             | 0.067  |
| 1DAN | HT | QT32A             | 0.652  |
| 1DAN | HT | RH125A            | 0.744  |

|      |    |              |        |
|------|----|--------------|--------|
| 1DAN | HT | ST37A        | -0.069 |
| 1DAN | LT | DT53A        | 1.988  |
| 1DAN | LT | DT53E        | 1.380  |
| 1DAN | LT | ET19A        | 0.658  |
| 1DAN | LT | FT45A        | 0.438  |
| 1DAN | LT | IT17A        | 0.645  |
| 1DAN | LT | KT41A        | 0.563  |
| 1DAN | LT | KT41A,KT43A  | 1.135  |
| 1DAN | LT | KT43A        | 0.685  |
| 1DAN | LT | ST42A        | -0.044 |
| 1DAN | LT | YT46A        | -0.132 |
| 1DAN | LU | EU114A       | -0.005 |
| 1DAN | LU | EU38A        | 0.086  |
| 1DAN | LU | FU50A        | 1.748  |
| 1DAN | LU | QU20A        | 1.305  |
| 1DAN | LU | SU69A        | 0.023  |
| 1DAN | LU | TU109A       | 0.135  |
| 1DAN | LU | VU113A       | 0.690  |
| 1DAN | LU | WU68F        | 0.123  |
| 1DAN | TU | EU9A         | -0.176 |
| 1DAN | TU | FU57A        | -0.060 |
| 1DAN | TU | IT58A        | 0.000  |
| 1DAN | TU | KT63A        | -0.070 |
| 1DAN | TU | KT63A,QT64A  | -0.206 |
| 1DAN | TU | LT67A        | -0.060 |
| 1DAN | TU | NU17A        | 0.000  |
| 1DAN | TU | QT64A        | 0.000  |
| 1DAN | TU | ST11A        | -0.130 |
| 1DAN | TU | TT16A        | -0.159 |
| 1DAN | TU | TT55A        | 2.312  |
| 1DAN | TU | TU16A        | -0.060 |
| 1DAN | TU | VT59A        | 0.000  |
| 1DAN | TU | VU56A        | 0.199  |
| 1DAN | TU | WT9F         | 0.691  |
| 1DAN | TU | YT73A        | 0.653  |
| 1DQJ | AC | NA31A        | 2.013  |
| 1DQJ | AC | NA32A        | 4.090  |
| 1DQJ | AC | NC93A        | 0.650  |
| 1DQJ | AC | SA91A        | 1.432  |
| 1DQJ | AC | TC89A        | 0.841  |
| 1DQJ | BC | DB32A        | 2.013  |
| 1DQJ | BC | DB32A,KC97A  | 1.122  |
| 1DQJ | BC | DC101A       | 1.377  |
| 1DQJ | BC | KC97A        | 3.520  |
| 1DQJ | BC | LC75A        | 1.452  |
| 1DQJ | BC | WC62A        | 0.758  |
| 1DQJ | BC | WC63A        | 1.346  |
| 1DQJ | BC | YB33A        | 5.524  |
| 1DQJ | BC | YB53A        | 1.180  |
| 1DQJ | BC | YB53A,DC101A | 2.727  |
| 1DQJ | BC | YB53A,LC75A  | 1.217  |
| 1DQJ | BC | YB53A,WC62A  | 1.286  |
| 1DQJ | BC | YB53A,WC63A  | 2.199  |
| 1DVF | AC | HA30A        | 1.649  |
| 1DVF | AC | SA93A        | 1.162  |
| 1DVF | BD | DB100A       | 2.789  |
| 1DVF | BD | DB100A,DD52A | 4.319  |
| 1DVF | BD | DB100A,HD33A | 4.148  |
| 1DVF | BD | DD52A        | 1.682  |

|      |    |             |        |
|------|----|-------------|--------|
| 1DVF | BD | HD33A       | 1.860  |
| 1DVF | BD | ID101A      | 2.681  |
| 1DVF | BD | KD30A       | 1.003  |
| 1DVF | BD | RB99A       | 1.875  |
| 1DVF | BD | TB30A       | 0.907  |
| 1DVF | BD | YB32A       | 1.831  |
| 1GCQ | AC | GC21V       | -0.025 |
| 1GCQ | AC | PC18A       | 0.121  |
| 1GCQ | AC | PC19A       | 0.085  |
| 1GCQ | BC | AC42G       | 1.353  |
| 1GCQ | BC | PC5A        | 0.767  |
| 1GCQ | BC | PC67A       | 1.316  |
| 1GCQ | BC | WC47Y       | 2.146  |
| 1JRH | HI | DH56A       | 1.886  |
| 1JRH | HI | DH58A       | 1.855  |
| 1JRH | HI | GI40A       | 4.450  |
| 1JRH | HI | KI42A       | 3.386  |
| 1JRH | HI | KI42M       | 4.911  |
| 1JRH | HI | NI69A       | -0.200 |
| 1JRH | HI | RH100A      | 0.543  |
| 1JRH | HI | VI41A       | 1.679  |
| 1JRH | HI | WH55A       | 2.421  |
| 1JRH | HI | YH104A      | 1.061  |
| 1JRH | HI | YH32A       | 1.433  |
| 1JRH | IL | DL28A       | 0.435  |
| 1JRH | IL | EL27A       | 0.543  |
| 1JRH | IL | KI37A       | 3.713  |
| 1JRH | IL | KI37M       | 3.292  |
| 1JRH | IL | KI88A       | 0.312  |
| 1JRH | IL | RI74A       | 0.392  |
| 1JRH | IL | SL93A       | -0.651 |
| 1JRH | IL | WI46F       | -0.253 |
| 1JRH | IL | WI46Y       | 0.298  |
| 1JRH | IL | WI72A       | 4.429  |
| 1JRH | IL | WI72F       | 1.103  |
| 1JRH | IL | WI72Y       | 1.188  |
| 1JRH | IL | WL92A       | 2.818  |
| 1JRH | IL | YL30A       | 1.108  |
| 1KIP | BC | AB32Y       | -0.801 |
| 1KIR | AC | SA50Y       | -1.387 |
| 1MHP | AH | GH53A       | 0.513  |
| 1MHP | AH | GH53N       | 1.255  |
| 1MHP | AH | GH53S       | 0.676  |
| 1MHP | AH | RH31Q       | 1.307  |
| 1MHP | AH | SH52M       | 2.076  |
| 1MHP | AH | TH33E,GH53Q | 1.667  |
| 1MHP | AH | TH33N       | 2.727  |
| 1MHP | AH | TH33V       | 0.434  |
| 1MHP | AH | YH58E       | 2.076  |
| 1MHP | AH | YH58Q       | 2.076  |
| 1MHP | AH | YH58W       | 0.821  |
| 1MHP | AL | GL91Q       | 1.573  |
| 1MHP | AL | GL91S       | 0.513  |
| 1MHP | AL | HL30K       | 1.164  |
| 1MHP | AL | HL30R       | 1.124  |
| 1MHP | AL | HL30W       | 1.255  |
| 1MHP | AL | NL29V       | 1.049  |
| 1MHP | AL | NL29W       | 1.573  |
| 1MHP | AL | NL29Y       | 1.907  |



|      |    |             |        |
|------|----|-------------|--------|
| 1MHP | AL | NL29Y,SL90I | 0.434  |
| 1MHP | AL | SL90Q       | 1.774  |
| 1MHP | AL | SL90R       | 2.727  |
| 1MHP | AL | SL90R,NL29E | 2.727  |
| 1MHP | AL | SL90T       | 2.317  |
| 1MHP | HL | FH99W       | 0.000  |
| 1MHP | HL | FH99Y       | 0.755  |
| 1MHP | HL | LH60D       | -0.061 |
| 1MHP | HL | SH35A       | 1.573  |
| 1MHP | HL | SH35Q       | 2.727  |
| 1MI5 | AD | AD91G       | 0.608  |
| 1MI5 | AD | GD92A       | 0.764  |
| 1MI5 | AD | LD49A       | 1.231  |
| 1MI5 | AD | SD26A       | -0.039 |
| 1MI5 | AD | SD51A       | 0.482  |
| 1MI5 | AD | TD94A       | 0.943  |
| 1MI5 | AE | EE50A       | 0.819  |
| 1MI5 | AE | GE95A       | 1.231  |
| 1MI5 | AE | LE94A       | 0.116  |
| 1MI5 | AE | NE49A       | -0.433 |
| 1MI5 | AE | QE48A       | -0.070 |
| 1MI5 | AE | SE29A       | 1.063  |
| 1MI5 | AE | VE28A       | 0.293  |
| 1MI5 | DE | EE99A       | 0.120  |
| 1MI5 | DE | GD97A       | 1.231  |
| 1MI5 | DE | KD98A       | 1.231  |
| 1MI5 | DE | QE100A      | 1.231  |
| 1MLC | AE | NA32G       | -0.877 |
| 1MLC | AE | NA32G,NA92A | -0.687 |
| 1MLC | AE | NA32Y       | 0.000  |
| 1MLC | AE | NA92A       | -1.253 |
| 1MLC | BE | SB57A       | -0.379 |
| 1MLC | BE | SB57V       | -0.494 |
| 1MLC | BE | TB31A       | 0.447  |
| 1MLC | BE | TB31V       | 0.526  |
| 1MLC | BE | TB31W       | 0.132  |
| 1N8Z | AB | YB109V      | 0.232  |
| 1N8Z | AC | NA30S       | 0.067  |
| 1NCA | HN | DH101K      | 0.714  |
| 1NCA | HN | EH100D      | 0.410  |
| 1NCA | HN | NH102Q      | 0.543  |
| 1NCA | HN | NH31Q       | 0.000  |
| 1NMB | HN | DH57E       | 2.953  |
| 1NMB | HN | DH57N       | 2.953  |
| 1NMB | HN | YH103A      | 2.141  |
| 1NMB | LN | TL93F       | -0.024 |
| 1NMB | LN | TL93W       | 0.184  |
| 1OGA | AC | EA63A       | -0.018 |
| 1OGA | AC | HA70A       | 0.517  |
| 1OGA | AC | TA80A       | 0.195  |
| 1OGA | AC | VA67A       | -0.139 |
| 1OGA | AD | EA154A      | 0.612  |
| 1OGA | AD | SD29A       | 0.627  |
| 1OGA | AE | AA149G      | 0.123  |
| 1OGA | AE | AA150G      | 0.448  |
| 1OGA | AE | DE52A       | 0.117  |
| 1OGA | AE | KA68A       | 0.248  |
| 1OGA | AE | NE51A       | 1.115  |
| 1OGA | AE | NE51D       | 0.495  |

|      |    |              |        |
|------|----|--------------|--------|
| 1OGA | AE | QA72A        | -0.459 |
| 1OGA | AE | RA65A        | -0.365 |
| 1OGA | AE | RA75A        | 0.711  |
| 1OGA | DE | QD32A        | 0.988  |
| 1OGA | DE | SD30A        | 1.019  |
| 1REW | AC | QC55A        | 2.657  |
| 1U7F | AB | RB65A        | 1.807  |
| 1U7F | BC | DB140A       | 2.780  |
| 1VFB | AB | DB58A        | -0.207 |
| 1VFB | AB | DB58E        | 0.078  |
| 1VFB | AB | DB58N        | -0.128 |
| 1VFB | AB | EB98A        | 1.156  |
| 1VFB | AB | LA46D        | 5.628  |
| 1VFB | AB | LA46E        | 5.628  |
| 1VFB | AC | DC18A        | 0.340  |
| 1VFB | AC | HA30A        | 0.845  |
| 1VFB | AC | IC124A       | 1.231  |
| 1VFB | AC | LC129A       | 0.172  |
| 1VFB | AC | NC19A        | 0.396  |
| 1VFB | AC | RC125A       | 1.837  |
| 1VFB | AC | SA93A        | 0.343  |
| 1VFB | AC | TA53R        | 1.646  |
| 1VFB | AC | WA92A        | 3.037  |
| 1VFB | AC | WA92A,IC124A | 3.850  |
| 1VFB | AC | WA92A,LC129A | 3.307  |
| 1VFB | AC | WA92A,RC125A | 3.393  |
| 1VFB | AC | YA50A        | 0.456  |
| 1VFB | AC | YA50A,DC18A  | 1.266  |
| 1VFB | AC | YA50K        | 1.716  |
| 1VFB | AC | YA50R        | 0.844  |
| 1VFB | BC | DB100A       | 3.005  |
| 1VFB | BC | DB54A        | 0.816  |
| 1VFB | BC | DB54A,TC118A | 1.255  |
| 1VFB | BC | DC119A       | 0.953  |
| 1VFB | BC | GB31A        | 0.306  |
| 1VFB | BC | GB31E        | -0.510 |
| 1VFB | BC | GB31W        | 0.004  |
| 1VFB | BC | KC116A       | 0.713  |
| 1VFB | BC | RB99A        | -0.100 |
| 1VFB | BC | RB99W        | 0.705  |
| 1VFB | BC | RB99Y        | 1.235  |
| 1VFB | BC | TB30A        | -0.056 |
| 1VFB | BC | TC118A       | 0.765  |
| 1VFB | BC | VC120A       | 0.917  |
| 1VFB | BC | YB32A        | 0.791  |
| 1VFB | BC | YB32A,KC116A | 1.586  |
| 1VFB | BC | YB32E        | 1.902  |
| 1VFB | BC | YC23A        | 0.410  |
| 1XGQ | BC | VB33A        | 1.153  |
| 1XGQ | BC | VB33F        | -2.908 |
| 1XGQ | BC | VB33I        | -1.108 |
| 1XGQ | BC | VB33L        | -1.046 |
| 1XGR | BC | IB33A        | 2.260  |
| 1XGR | BC | IB33F        | -1.800 |
| 1XGR | BC | IB33L        | 0.061  |
| 1XGR | BC | IB33V        | 1.108  |
| 1XGT | BC | LB33A        | 2.199  |
| 1XGT | BC | LB33F        | -1.862 |
| 1XGT | BC | LB33I        | -0.061 |

|      |    |             |        |
|------|----|-------------|--------|
| 1XGT | BC | LB33V       | 1.046  |
| 1XGU | BC | FB33A       | 4.060  |
| 1XGU | BC | FB33I       | 1.800  |
| 1XGU | BC | FB33L       | 1.862  |
| 1XGU | BC | FB33V       | 2.908  |
| 1YY9 | AC | NC93A       | -0.742 |
| 1YY9 | AD | GD54P       | 0.268  |
| 1YY9 | AD | ND56A       | -0.057 |
| 1YY9 | AD | SD53P       | 0.817  |
| 1YY9 | AD | WD52P       | 1.478  |
| 1YY9 | AD | YD101P      | 1.651  |
| 1YY9 | CD | TD61E       | -0.057 |
| 2AK4 | AD | AA158G      | 0.873  |
| 2AK4 | AD | EA161A      | 0.465  |
| 2AK4 | AD | ND51A       | 1.403  |
| 2AK4 | AD | RA157A      | 1.403  |
| 2AK4 | AD | TD30A       | -0.127 |
| 2AK4 | AE | RA151A      | 1.367  |
| 2AK4 | CD | SD94A       | 1.403  |
| 2AK4 | CE | NE26A       | 0.209  |
| 2AK4 | CE | QC9A        | 0.066  |
| 2B0U | AC | FC52A       | 0.000  |
| 2B0U | AC | FC52E       | 0.000  |
| 2B0U | BC | VC15E       | 0.000  |
| 2B2X | AL | QL28S,YL52N | 0.863  |
| 2B2X | AL | YL52E       | -0.224 |
| 2BDN | AH | DH31E       | 1.085  |
| 2BDN | AL | YL30K       | 0.675  |
| 2BNQ | AC | VC9C        | 0.502  |
| 2BNR | AC | CC9V        | -0.502 |
| 2BNR | AC | EA63A       | 0.335  |
| 2BNR | AC | HA70A       | 1.695  |
| 2BNR | AC | TA80A       | 0.535  |
| 2BNR | AC | VA152A      | 0.903  |
| 2BNR | AC | VA67A       | 0.393  |
| 2BNR | AD | EA154A      | 0.018  |
| 2BNR | AD | HA151A      | 0.533  |
| 2BNR | AE | KA68A       | 0.006  |
| 2BNR | AE | QA72A       | -0.096 |
| 2BNR | AE | RA75A       | 0.531  |
| 2JCC | AC | AA167W      | -0.299 |
| 2JEL | HP | EP68A       | 0.410  |
| 2JEL | HP | EP70A       | 2.727  |
| 2JEL | HP | EP70K       | 4.090  |
| 2JEL | HP | EP75R       | 2.727  |
| 2JEL | HP | FP2W        | 2.619  |
| 2JEL | HP | FP2Y        | 0.000  |
| 2JEL | HP | HP76A       | -0.410 |
| 2JEL | HP | HP76D       | -0.651 |
| 2JEL | HP | KP72E       | 0.410  |
| 2JEL | HP | KP72R       | 0.000  |
| 2JEL | HP | QP4K        | 1.363  |
| 2JEL | HP | QP71E       | 2.727  |
| 2JEL | LP | SP41C       | 1.496  |
| 2JEL | LP | SP64T       | 4.090  |
| 2JEL | LP | TP34N       | 6.817  |
| 2JEL | LP | TP34Q       | 0.000  |
| 2JEL | LP | TP36Q       | 0.410  |
| 2NYY | AC | DC30Y       | 0.641  |

|      |    |         |        |
|------|----|---------|--------|
| 2NYY | AC | FA925A  | 4.058  |
| 2NYY | AC | HC34R   | 0.101  |
| 2NYY | AC | IA928A  | -0.009 |
| 2NYY | AC | NA926A  | 0.099  |
| 2NYY | AC | RA1266A | 0.300  |
| 2NYY | AC | SA927A  | 0.000  |
| 2NYY | AC | SC31N   | -0.353 |
| 2NYY | AD | DA1030A | 0.009  |
| 2NYY | AD | EA892A  | 2.839  |
| 2NYY | AD | FA889A  | 0.419  |
| 2NYY | AD | KA1028A | -0.029 |
| 2NYY | AD | LA891A  | 2.589  |
| 2NYY | AD | NA890A  | 0.890  |
| 2NYY | AD | RA1033A | 0.820  |
| 2NYY | AD | SA874A  | -0.230 |
| 2NYY | AD | YD30D   | 0.065  |
| 2NYY | AD | YD30Q   | 0.129  |
| 2NYY | AD | YD56Q   | 0.520  |
| 2NYY | CD | VD36I   | -0.213 |
| 2NZ9 | AC | FA925A  | 3.340  |
| 2NZ9 | AC | IA928A  | 0.069  |
| 2NZ9 | AC | NA926A  | -0.152 |
| 2NZ9 | AC | RA1266A | 0.390  |
| 2NZ9 | AC | SA927A  | -0.079 |
| 2NZ9 | AD | DA1030A | -0.031 |
| 2NZ9 | AD | EA892A  | 2.770  |
| 2NZ9 | AD | FA889A  | -0.050 |
| 2NZ9 | AD | KA1028A | -0.009 |
| 2NZ9 | AD | KA875A  | 0.541  |
| 2NZ9 | AD | LA891A  | 2.280  |
| 2NZ9 | AD | NA890A  | 2.160  |
| 2NZ9 | AD | RA1033A | 0.291  |
| 2NZ9 | AD | SA874A  | -0.119 |
| 2UWE | AE | AA163T  | 0.404  |
| 2VIR | BC | SC115L  | 3.680  |
| 2VIR | BC | TC89I   | 4.911  |
| 2VIS | BC | IC89T   | -4.911 |
| 3AAA | AC | DC43A   | 5.037  |
| 3AAA | AC | EC77A   | 1.932  |
| 3AAA | AC | EC77R   | 4.022  |
| 3AAA | AC | RA258A  | 2.207  |
| 3AAA | AC | RA258E  | 3.502  |
| 3B4V | AC | LC53A   | 3.391  |
| 3B4V | AC | LC53E   | 4.090  |
| 3B4V | BC | LC16E   | 0.821  |
| 3BN9 | BD | DB214A  | 0.566  |
| 3BN9 | BD | DB47A   | 0.311  |
| 3BN9 | BD | DB91A   | 6.695  |
| 3BN9 | BD | IB45A   | 0.835  |
| 3BN9 | BD | NB90A   | 0.773  |
| 3BN9 | BD | PD104H  | 2.427  |
| 3BN9 | BD | QB218A  | 0.706  |
| 3BN9 | BD | QD105V  | 1.224  |
| 3BN9 | BD | RB48A   | -0.045 |
| 3BN9 | BD | SD30G   | 1.186  |
| 3BN9 | BD | SD30N   | 1.145  |
| 3BN9 | BD | TB93A   | 1.132  |
| 3BN9 | BD | TD28R   | 0.333  |
| 3BN9 | BD | YB141A  | 1.085  |

|      |    |             |        |
|------|----|-------------|--------|
| 3BN9 | BD | YD103S      | 0.459  |
| 3C60 | AD | ED79A       | 0.047  |
| 3C60 | AD | HD91A       | 1.085  |
| 3C60 | AD | TD87A       | 1.166  |
| 3C60 | BC | KC40A       | 1.594  |
| 3C60 | BC | LC61A       | 0.943  |
| 3C60 | BD | RD80A       | 2.025  |
| 3D3V | CE | EE30A       | 2.671  |
| 3HFM | HY | DH32A       | 1.898  |
| 3HFM | HY | DH32A,KY97A | 4.592  |
| 3HFM | HY | DH32A,KY97M | 1.123  |
| 3HFM | HY | DH32N       | 0.170  |
| 3HFM | HY | DH32N,KY97A | 4.891  |
| 3HFM | HY | DH32N,KY97M | 0.302  |
| 3HFM | HY | DY101A      | 1.232  |
| 3HFM | HY | DY101E      | 2.132  |
| 3HFM | HY | DY101F      | 2.328  |
| 3HFM | HY | DY101G      | 0.359  |
| 3HFM | HY | DY101K      | 2.124  |
| 3HFM | HY | DY101N      | 1.491  |
| 3HFM | HY | DY101Q      | 2.085  |
| 3HFM | HY | DY101R      | 2.279  |
| 3HFM | HY | DY101S      | 1.869  |
| 3HFM | HY | GY102V      | 0.395  |
| 3HFM | HY | IY98A       | 0.000  |
| 3HFM | HY | KY97A       | 5.861  |
| 3HFM | HY | KY97D       | 6.768  |
| 3HFM | HY | KY97E       | 3.604  |
| 3HFM | HY | KY97G       | 6.430  |
| 3HFM | HY | KY97M       | 0.947  |
| 3HFM | HY | KY97R       | 3.053  |
| 3HFM | HY | LY75A       | 0.704  |
| 3HFM | HY | RY73A       | -0.331 |
| 3HFM | HY | SH31A       | 0.170  |
| 3HFM | HY | WY63A       | 0.319  |
| 3HFM | HY | YH33A       | 6.035  |
| 3HFM | HY | YH33A,KY97A | 7.228  |
| 3HFM | HY | YH33F       | 1.071  |
| 3HFM | HY | YH33L       | 2.007  |
| 3HFM | HY | YH33W       | 1.749  |
| 3HFM | HY | YH53A       | 3.250  |
| 3HFM | HY | YH53F       | 0.620  |
| 3HFM | HY | YH53L       | 0.807  |
| 3HFM | HY | YH53W       | 0.706  |
| 3HFM | LY | HY15A       | -0.445 |
| 3HFM | LY | KY96A       | 6.737  |
| 3HFM | LY | KY96M       | 6.777  |
| 3HFM | LY | KY96R       | 5.353  |
| 3HFM | LY | NL31A       | 5.214  |
| 3HFM | LY | NL31A,KY96A | 7.468  |
| 3HFM | LY | NL31D       | 1.343  |
| 3HFM | LY | NL31E       | 5.707  |
| 3HFM | LY | NL32A       | 5.107  |
| 3HFM | LY | NY19D       | 0.410  |
| 3HFM | LY | NY19K       | 0.240  |
| 3HFM | LY | NY19Q       | -0.042 |
| 3HFM | LY | NY93A       | 0.211  |
| 3HFM | LY | QL53A       | 0.953  |
| 3HFM | LY | TY89A       | 0.000  |

|      |    |                         |        |
|------|----|-------------------------|--------|
| 3HH2 | AC | FC52A                   | 1.272  |
| 3HH2 | AC | FC52E                   | 0.816  |
| 3HH2 | BC | VC15E                   | 0.684  |
| 3L5X | HL | YL94A                   | -0.829 |
| 3N85 | AH | SH32A                   | -0.134 |
| 3N85 | AH | SH32Y                   | 0.057  |
| 3N85 | AH | SH52Y                   | -0.785 |
| 3N85 | AH | WH30K                   | -0.785 |
| 3N85 | AH | WH30R                   | -0.554 |
| 3N85 | HL | SH50G                   | 0.488  |
| 3NGB | GH | AH57G                   | -0.056 |
| 3NGB | GH | AH57G,VH58T,PH63K,VH74T | 1.673  |
| 3NGB | GH | DH103A                  | 0.060  |
| 3NGB | GH | GH55A                   | -1.277 |
| 3NGB | GH | GH55S                   | 0.743  |
| 3NGB | GH | GH56A                   | 1.266  |
| 3NGB | GH | IH30A                   | -0.003 |
| 3NGB | GH | IH30T                   | 0.073  |
| 3NGB | GH | KH52A                   | 0.623  |
| 3NGB | GH | KH52N                   | 0.175  |
| 3NGB | GH | NH105A                  | 1.119  |
| 3NGB | GH | NH59A                   | 1.767  |
| 3NGB | GH | PH63A                   | -0.043 |
| 3NGB | GH | PH63K                   | 0.233  |
| 3NGB | GH | QH65A                   | -0.340 |
| 3NGB | GH | RH54A                   | -0.259 |
| 3NGB | GH | RH54N                   | 0.046  |
| 3NGB | GH | RH62A                   | 0.996  |
| 3NGB | GH | RH62Q                   | 0.097  |
| 3NGB | GH | RH72A                   | 1.643  |
| 3NGB | GH | VH58A                   | 1.358  |
| 3NGB | GH | VH58T                   | 0.138  |
| 3NGB | GH | VH74A                   | 1.088  |
| 3NGB | GH | VH74T                   | 0.165  |
| 3NGB | GH | WH50A                   | 1.292  |
| 3NGB | GH | YH60A                   | 0.548  |
| 3NGB | GH | YH75A                   | -0.199 |
| 3NGB | GH | YH75S                   | 0.333  |
| 3NGB | GL | FL89A                   | 0.859  |
| 3NGB | GL | QL25A                   | -0.231 |
| 3NGB | GL | VL1A                    | -0.773 |
| 3NGB | GL | YL26A                   | 0.985  |
| 3NGB | GL | YL26S                   | 0.651  |
| 3NPS | AB | DA214A                  | 1.467  |
| 3NPS | AB | DA91A                   | 1.507  |
| 3NPS | AB | FA92A                   | 0.464  |
| 3NPS | AB | IA26A                   | 0.642  |
| 3NPS | AB | QA168A                  | -0.059 |
| 3NPS | AB | QA169A                  | 0.741  |
| 3NPS | AB | TA93A                   | 0.724  |
| 3NPS | AC | HA138A                  | 1.875  |
| 3NPS | AC | QA140A                  | 0.296  |
| 3QDG | AD | DD26W                   | -1.561 |
| 3QDG | AD | DD26Y                   | -1.793 |
| 3QDG | AD | RD27P                   | 0.138  |
| 3QDG | AD | RD27W                   | 0.596  |
| 3QDJ | AD | DD26W                   | -2.171 |
| 3QDJ | AD | DD26Y                   | -1.337 |
| 3QDJ | AD | GD28I                   | -0.105 |

|      |    |                         |        |
|------|----|-------------------------|--------|
| 3QDJ | AD | GD28L                   | 0.655  |
| 3QDJ | AD | GD28N                   | 0.410  |
| 3QDJ | AD | GD28P                   | 1.224  |
| 3QDJ | AD | GD28Y                   | 0.556  |
| 3QDJ | AD | RD27P                   | 0.040  |
| 3QDJ | AD | RD27W                   | 0.217  |
| 3QIB | AD | AA61G                   | 0.892  |
| 3QIB | AD | AA64G                   | 0.610  |
| 3QIB | AD | AA68G                   | 0.845  |
| 3QIB | AD | KA67A                   | 0.566  |
| 3QIB | BC | AB71G                   | 2.203  |
| 3QIB | BC | DB74A                   | 0.862  |
| 3QIB | BC | EB67A                   | 1.821  |
| 3QIB | BD | QB62A                   | 1.763  |
| 3R9A | AB | AA323W                  | 0.339  |
| 3R9A | AB | YA325A                  | 1.014  |
| 3R9A | AB | YA325W                  | 0.482  |
| 3SE3 | BA | DA117A                  | 0.543  |
| 3SE3 | BA | FA223A                  | 1.497  |
| 3SE3 | BA | FA81A                   | 0.410  |
| 3SE3 | BA | LA116A                  | 0.000  |
| 3SE3 | BA | NA140T                  | 0.133  |
| 3SE3 | BA | NA230A                  | 0.211  |
| 3SE3 | BA | NA53A                   | -0.348 |
| 3SE3 | BA | RA226A                  | 0.410  |
| 3SE3 | BA | SA120A                  | 0.543  |
| 3SE3 | BA | SA167A                  | -0.239 |
| 3SE3 | BA | TA166A                  | -0.156 |
| 3SE3 | BA | YA55A                   | 1.497  |
| 3SE3 | BA | YB43A,NB44A,SB47A       | 0.590  |
| 3SE3 | BA | YB43A,NB44E,SB47Q       | 1.917  |
| 3SE3 | BA | YB43H,NB44A,SB47Q       | 1.445  |
| 3SE3 | BA | YB43H,NB44E,SB47A       | 1.823  |
| 3SE3 | BA | YB43H,NB44E,SB47Q       | 2.456  |
| 3SE3 | BA | YB43H,NB44E,SB47Q,EB82A | 2.761  |
| 3SE3 | BA | YB43H,NB44E,SB47Q,FB50A | 2.850  |
| 3SE3 | BA | YB43H,NB44E,SB47Q,IB88A | 2.326  |
| 3SE3 | BA | YB43H,NB44E,SB47Q,KB56A | 2.695  |
| 3SE3 | BA | YB43H,NB44E,SB47Q,KB93A | 2.609  |
| 3SE3 | BA | YB43H,NB44E,SB47Q,NB51A | 3.093  |
| 3SE3 | BA | YB43H,NB44E,SB47Q,NB79A | 2.827  |
| 3SE3 | BA | YB43H,NB44E,SB47Q,QB48A | 2.490  |
| 3SE3 | BA | YB43H,NB44E,SB47Q,QB76A | 2.348  |
| 3SE3 | BA | YB43H,NB44E,SB47Q,RB92A | 2.835  |
| 3SE3 | BA | YB43H,NB44E,SB47Q,RB92K | 2.609  |
| 3SE3 | BA | YB43H,NB44E,SB47Q,TB72A | 2.741  |
| 3SE3 | BA | YB43H,NB44E,SB47Q,YB71A | 2.985  |
| 3SE3 | BA | YB43H,NB44E,SB47Q,YB75A | 3.125  |
| 3SE3 | BA | YB43M,NB44D,SB47L       | 0.713  |
| 3SE4 | BA | DA117A                  | 0.132  |
| 3SE4 | BA | FA223A                  | 1.363  |
| 3SE4 | BA | LA116A                  | 0.132  |
| 3SE4 | BA | NA140T                  | 0.410  |
| 3SE4 | BA | NA227A                  | 0.000  |
| 3SE4 | BA | RA226A                  | 0.303  |
| 3SE4 | BA | SA120A                  | 0.000  |
| 3SE4 | BA | TA166A                  | -0.543 |
| 3SE4 | BA | YA55A                   | 1.363  |
| 3SE4 | BC | HC172A                  | -0.410 |

|      |    |        |        |
|------|----|--------|--------|
| 3SE4 | BC | HC68A  | -0.610 |
| 3SE4 | BC | IC95A  | 1.209  |
| 3SE4 | BC | KB134A | 1.788  |
| 3SE4 | BC | KB134R | -0.936 |
| 3SE4 | BC | LB31A  | 2.727  |
| 3SE4 | BC | MB130A | 0.573  |
| 3SE4 | BC | MC38A  | 1.665  |
| 3SE4 | BC | MC38V  | 1.165  |
| 3SE4 | BC | PB27A  | -0.170 |
| 3SE4 | BC | PB27L  | 0.924  |
| 3SE4 | BC | SC39A  | 0.212  |
| 3SE4 | BC | TC36A  | 1.363  |
| 3SE4 | BC | VC72A  | 1.165  |
| 3SE8 | GH | DH110A | -0.389 |
| 3SE8 | GH | DH114A | -0.244 |
| 3SE8 | GH | GH56A  | 0.357  |
| 3SE8 | GH | KH52A  | 1.111  |
| 3SE8 | GH | LH54A  | 0.055  |
| 3SE8 | GH | PH78A  | 0.019  |
| 3SE8 | GH | PH81A  | -0.071 |
| 3SE8 | GH | QH63A  | 1.114  |
| 3SE8 | GH | QH65A  | 0.550  |
| 3SE8 | GH | QH76A  | 0.097  |
| 3SE8 | GH | RH30A  | -0.039 |
| 3SE8 | GH | RH62A  | 1.206  |
| 3SE8 | GH | RH72A  | 2.644  |
| 3SE8 | GH | SH59A  | 1.151  |
| 3SE8 | GH | VH58A  | 1.250  |
| 3SE8 | GH | WH50A  | 1.333  |
| 3SE8 | GH | WH55A  | 0.761  |
| 3SE8 | GH | YH60A  | 0.856  |
| 3SE8 | GL | EL1A   | -0.556 |
| 3SE8 | GL | FL92A  | 0.832  |
| 3SE8 | GL | NL30A  | 0.194  |
| 3SE8 | HL | DL49A  | 0.856  |
| 3SE9 | GH | DH77A  | -0.766 |
| 3SE9 | GH | GH106A | -0.308 |
| 3SE9 | GH | GH57A  | 0.452  |
| 3SE9 | GH | GH62A  | 0.046  |
| 3SE9 | GH | LH34A  | 0.566  |
| 3SE9 | GH | NH60A  | 1.522  |
| 3SE9 | GH | PH64A  | -0.442 |
| 3SE9 | GH | RH67A  | 1.469  |
| 3SE9 | GH | RH74A  | 2.679  |
| 3SE9 | GH | RH76A  | -0.232 |
| 3SE9 | GH | TH105A | -0.442 |
| 3SE9 | GH | TH56A  | -0.859 |
| 3SE9 | GH | VH55A  | -0.859 |
| 3SE9 | GH | VH59A  | 0.983  |
| 3SE9 | GH | WH51A  | 1.276  |
| 3SE9 | GH | YH104A | 0.464  |
| 3SE9 | GL | FL91A  | 0.024  |
| 3SE9 | GL | VL3A   | -0.494 |
| 3SEK | AC | LC48A  | 3.407  |
| 3SEK | AC | LC48E  | 4.213  |
| 3SEK | BC | LC11E  | 2.886  |
| 3SZK | AC | FC44A  | 2.089  |
| 3SZK | AC | NC66A  | 0.194  |
| 3SZK | AC | SC69A  | 1.437  |



|      |    |                   |        |
|------|----|-------------------|--------|
| 3SZK | AC | TC70A             | 1.395  |
| 3SZK | AC | YC40A             | 2.757  |
| 3SZK | AC | YC41A             | 2.831  |
| 3VR6 | CG | LG139N            | 0.709  |
| 3VR6 | DG | LG28N             | 0.310  |
| 4B0M | AM | LM40A             | 1.908  |
| 4B0M | AM | PM98A             | 0.406  |
| 4B0M | AM | PM98S             | 0.758  |
| 4B0M | AM | PM98S,PM99A       | 2.072  |
| 4B0M | AM | PM99A             | 1.915  |
| 4B0M | AM | PM99S             | 1.993  |
| 4B0M | AM | YM37A             | 1.652  |
| 4B0M | BM | YM9G              | 0.629  |
| 4FTV | AD | KD66A             | -1.579 |
| 4FTV | AD | RA65A             | 3.506  |
| 4GXU | AM | DA189E            | 2.165  |
| 4GXU | AM | DA189E,DA224G     | 3.010  |
| 4GXU | AM | DA224G            | 1.961  |
| 4HFK | AB | EB46A             | 1.188  |
| 4HFK | AB | EB56A             | 0.942  |
| 4HFK | AB | LB45A             | 2.524  |
| 4HFK | AB | LB50A             | 0.030  |
| 4HFK | AB | NB49A             | -0.020 |
| 4HFK | AB | RB22A             | 1.391  |
| 4HFK | AB | SB48A             | 0.201  |
| 4HFK | AD | TD72A             | 1.849  |
| 4HSA | AC | HA59S             | -0.123 |
| 4HSA | AC | YA58I             | 0.118  |
| 4I77 | HZ | DH54A             | 2.620  |
| 4I77 | HZ | YH100A            | 0.000  |
| 4I77 | HZ | YH100F            | 0.000  |
| 4I77 | LZ | YL32A             | 0.815  |
| 4I77 | LZ | YL32F             | 0.000  |
| 4J2L | AC | LA118E            | -0.631 |
| 4J2L | AC | LC20S             | 1.688  |
| 4J2L | AC | SA34D             | -0.970 |
| 4J2L | AC | SA34D,LA118E      | 0.697  |
| 4J2L | AC | WC17A             | 2.229  |
| 4JPK | AH | DA141R            | 3.857  |
| 4JPK | AH | FA144I            | 1.387  |
| 4JPK | AH | TA35S             | -0.032 |
| 4JPK | AL | RA81T             | 0.759  |
| 4K71 | AB | HA462A            | 1.051  |
| 4K71 | AB | HA462F            | 1.009  |
| 4K71 | AB | HB157A            | 0.644  |
| 4K71 | AB | HB157F            | 0.185  |
| 4L3E | AD | EA166A            | 1.217  |
| 4N8V | AG | KG38A             | 0.588  |
| 4N8V | AG | YG124A            | 0.120  |
| 4N8V | AG | YG39F             | 0.515  |
| 4NKQ | AC | EC8R              | 2.639  |
| 4NKQ | AC | NC4E              | -0.390 |
| 4NKQ | AC | RC11D             | -0.205 |
| 4NKQ | BC | DC99K             | -0.331 |
| 4NKQ | BC | DC99K,KB90D       | -0.502 |
| 4NKQ | BC | DC99K,RB80D       | 0.176  |
| 4NKQ | BC | DC99K,RB80D,KB90D | 0.535  |
| 4NKQ | BC | KB89A             | 0.386  |
| 4NKQ | BC | KB89D             | 1.061  |

|      |    |                   |        |
|------|----|-------------------|--------|
| 4NKQ | BC | KB90A             | -0.199 |
| 4NKQ | BC | KB90D             | -0.199 |
| 4NKQ | BC | LB77A,TB78A,SB79A | 0.110  |
| 4NKQ | BC | RB178A            | 0.360  |
| 4NKQ | BC | RB178D            | -0.291 |
| 4NKQ | BC | RB178M            | 2.134  |
| 4NKQ | BC | RB80A             | 0.120  |
| 4NKQ | BC | RB80D             | -0.077 |
| 4NKQ | BC | RB80D,KB90D       | 1.313  |
| 4NKQ | BC | RC10D             | 0.111  |
| 4NM8 | BH | QB34R             | 2.975  |
| 4NM8 | BH | QB34T             | 2.331  |
| 4NM8 | BH | TB32E             | -0.552 |
| 4NM8 | BH | TB32I             | -0.050 |
| 4NM8 | BH | TB32R             | 1.221  |
| 4NM8 | BL | LB38Y             | -0.615 |
| 4OZG | AH | QH48A             | 0.791  |
| 4OZG | AH | YH46F             | -0.636 |
| 4OZG | BG | LG50A             | 1.166  |
| 4OZG | BG | YG31A             | 1.714  |
| 4P23 | BC | KC40A             | 1.193  |
| 4P23 | BC | KC68A             | 0.683  |
| 4P23 | BC | LC61A             | 0.953  |
| 4P23 | BD | ED75A             | 0.170  |
| 4P23 | BD | RD79A             | 2.070  |
| 4P5T | AD | DD84A             | 0.000  |
| 4P5T | AD | ED77A             | 1.009  |
| 4P5T | AD | HD89A             | 0.796  |
| 4P5T | AD | TD85A             | 0.821  |
| 4P5T | BC | KC40A             | 1.138  |
| 4P5T | BC | LC61A             | 1.009  |
| 4PWX | AC | EA201K            | 1.728  |
| 4PWX | AC | QA205A            | 1.013  |
| 4PWX | AC | QC20A             | -0.178 |
| 4PWX | AC | RC28A             | 1.728  |
| 4PWX | AC | RC31A             | 0.335  |
| 4PWX | AC | YA198A            | 1.728  |
| 4PWX | BC | DC60K             | 0.371  |
| 4PWX | BC | KB65A             | 0.202  |
| 4PWX | BC | KB65D             | 0.119  |
| 4PWX | BC | KB68A             | 0.448  |
| 4PWX | BC | KB68D             | 0.262  |
| 4PWX | BC | RB71A             | 0.359  |
| 4U6H | AE | NE21A             | -0.348 |
| 4X4M | BE | KE153A            | 0.639  |
| 4X4M | BE | KE153E            | 0.953  |
| 4ZS6 | AH | EA156A            | 3.038  |
| 4ZS6 | AH | YA160A            | -0.110 |
| 5C6T | AH | EA194A            | 1.091  |
| 5C6T | AH | FA192A            | 1.997  |
| 5C6T | AH | FA199A            | 2.758  |
| 5C6T | AH | FA200A            | 0.410  |
| 5C6T | AH | IA201A            | 0.886  |
| 5C6T | AH | NA186A            | 0.363  |
| 5C6T | AH | NA188A            | -0.367 |
| 5C6T | AH | NA195A,DA197A     | 0.586  |
| 5C6T | AH | NH97A             | 1.526  |
| 5C6T | AH | RH31S             | 0.312  |
| 5C6T | AH | SH32A             | -0.868 |

|      |    |                      |        |
|------|----|----------------------|--------|
| 5C6T | AH | YA182A               | 3.208  |
| 5C6T | AH | YA182A,NA195A,DA197A | 2.942  |
| 5C6T | AH | YH104A               | 0.363  |
| 5C6T | AH | YH98A                | 1.717  |
| 5E9D | AD | SD50G                | -0.036 |
| 5E9D | DE | KD96Q                | 0.187  |

**Table S9.** Experimental data for CAPRI target T55.

| Chains | Mutation | Experiment enrichment value |
|--------|----------|-----------------------------|
| AC     | DC50A    | -1.556                      |
| AC     | DC50C    | -5.283                      |
| AC     | DC50E    | -1.564                      |
| AC     | DC50F    | -6.055                      |
| AC     | DC50G    | -1.036                      |
| AC     | DC50H    | -4.238                      |
| AC     | DC50I    | -3.824                      |
| AC     | DC50K    | -7.443                      |
| AC     | DC50L    | -3.578                      |
| AC     | DC50M    | -6.598                      |
| AC     | DC50N    | -1.431                      |
| AC     | DC50P    | -1.670                      |
| AC     | DC50Q    | -7.275                      |
| AC     | DC50R    | -6.909                      |
| AC     | DC50S    | -1.708                      |
| AC     | DC50T    | -2.587                      |
| AC     | DC50V    | -2.452                      |
| AC     | DC50W    | -7.955                      |
| AC     | DC50Y    | -2.297                      |
| AC     | AC62C    | -5.335                      |
| AC     | AC62D    | -3.231                      |
| AC     | AC62E    | -4.152                      |
| AC     | AC62F    | -3.359                      |
| AC     | AC62G    | -0.448                      |
| AC     | AC62H    | -4.760                      |
| AC     | AC62I    | -5.027                      |
| AC     | AC62K    | 0.275                       |
| AC     | AC62L    | -5.590                      |
| AC     | AC62M    | -5.826                      |
| AC     | AC62N    | -4.217                      |
| AC     | AC62P    | -4.158                      |
| AC     | AC62Q    | -3.053                      |
| AC     | AC62R    | -0.826                      |
| AC     | AC62S    | -0.070                      |
| AC     | AC62T    | -2.972                      |
| AC     | AC62V    | -3.500                      |
| AC     | AC62W    | -6.381                      |
| AC     | AC62Y    | -7.710                      |
| BC     | SC47A    | -1.429                      |
| BC     | SC47C    | -5.930                      |
| BC     | SC47D    | -4.528                      |
| BC     | SC47E    | -2.975                      |
| BC     | SC47F    | -1.381                      |
| BC     | SC47G    | -3.035                      |
| BC     | SC47H    | 2.084                       |
| BC     | SC47I    | -2.392                      |
| BC     | SC47K    | -1.269                      |
| BC     | SC47L    | -3.048                      |
| BC     | SC47M    | -1.915                      |
| BC     | SC47N    | 0.502                       |
| BC     | SC47P    | -3.533                      |
| BC     | SC47Q    | -0.948                      |
| BC     | SC47R    | -3.703                      |
| BC     | SC47T    | 0.846                       |
| BC     | SC47V    | -2.157                      |
| BC     | SC47W    | -3.375                      |
| BC     | SC47Y    | -0.578                      |

|    |       |        |
|----|-------|--------|
| BC | MC56A | -3.985 |
| BC | MC56C | -2.978 |
| BC | MC56D | -5.257 |
| BC | MC56E | -6.943 |
| BC | MC56F | -6.040 |
| BC | MC56G | -1.555 |
| BC | MC56H | 4.910  |
| BC | MC56I | 0.491  |
| BC | MC56K | -1.642 |
| BC | MC56L | -0.356 |
| BC | MC56N | 3.588  |
| BC | MC56P | -5.720 |
| BC | MC56Q | -2.720 |
| BC | MC56R | -1.667 |
| BC | MC56S | -1.679 |
| BC | MC56T | -0.762 |
| BC | MC56V | 0.368  |
| BC | MC56W | -7.408 |
| BC | MC56Y | 1.699  |
| BC | VC60A | -2.202 |
| BC | VC60C | -7.150 |
| BC | VC60D | -2.704 |
| BC | VC60E | -6.573 |
| BC | VC60F | 2.526  |
| BC | VC60G | -4.036 |
| BC | VC60H | -5.943 |
| BC | VC60I | -0.198 |
| BC | VC60K | -4.504 |
| BC | VC60L | 2.545  |
| BC | VC60M | -4.616 |
| BC | VC60N | 4.115  |
| BC | VC60P | -4.328 |
| BC | VC60Q | 0.504  |
| BC | VC60R | -4.619 |
| BC | VC60S | -2.384 |
| BC | VC60T | 1.327  |
| BC | VC60W | -6.976 |
| BC | VC60Y | 0.203  |
| BC | KC64A | -3.040 |
| BC | KC64C | -6.233 |
| BC | KC64D | -3.936 |
| BC | KC64E | -2.508 |
| BC | KC64F | -3.852 |
| BC | KC64G | -4.679 |
| BC | KC64H | -1.126 |
| BC | KC64I | -6.600 |
| BC | KC64L | -3.844 |
| BC | KC64M | -2.880 |
| BC | KC64N | -2.667 |
| BC | KC64P | -4.613 |
| BC | KC64Q | -3.167 |
| BC | KC64R | 0.240  |
| BC | KC64S | -3.326 |
| BC | KC64T | -3.841 |
| BC | KC64V | -5.478 |
| BC | KC64W | -4.803 |
| BC | KC64Y | -5.966 |
| BC | RC65A | -4.781 |
| BC | RC65C | -4.834 |

|    |       |        |
|----|-------|--------|
| BC | RC65D | -3.893 |
| BC | RC65E | -4.021 |
| BC | RC65F | -5.953 |
| BC | RC65G | -3.289 |
| BC | RC65H | -2.967 |
| BC | RC65I | -3.076 |
| BC | RC65K | 1.002  |
| BC | RC65L | -3.212 |
| BC | RC65M | -3.030 |
| BC | RC65N | -4.494 |
| BC | RC65P | -4.456 |
| BC | RC65Q | -2.488 |
| BC | RC65S | -2.768 |
| BC | RC65T | -3.343 |
| BC | RC65V | -4.436 |
| BC | RC65W | -4.182 |
| BC | RC65Y | -4.940 |
| BC | PC66A | 0.592  |
| BC | PC66C | -6.206 |
| BC | PC66D | -3.820 |
| BC | PC66E | -4.894 |
| BC | PC66F | -3.433 |
| BC | PC66G | -2.116 |
| BC | PC66H | -0.473 |
| BC | PC66I | -2.091 |
| BC | PC66K | 3.172  |
| BC | PC66L | -2.859 |
| BC | PC66M | -2.010 |
| BC | PC66N | -0.198 |
| BC | PC66Q | -1.135 |
| BC | PC66R | 1.404  |
| BC | PC66S | 0.501  |
| BC | PC66T | 0.660  |
| BC | PC66V | -1.398 |
| BC | PC66W | -5.041 |
| BC | PC66Y | -2.872 |
| BC | FC69A | -5.429 |
| BC | FC69C | -3.395 |
| BC | FC69D | -3.332 |
| BC | FC69E | -8.112 |
| BC | FC69G | -4.310 |
| BC | FC69H | -2.691 |
| BC | FC69I | -3.777 |
| BC | FC69K | -4.439 |
| BC | FC69L | -2.377 |
| BC | FC69M | -2.662 |
| BC | FC69N | -4.069 |
| BC | FC69P | -4.824 |
| BC | FC69Q | -4.325 |
| BC | FC69R | -4.375 |
| BC | FC69S | -4.016 |
| BC | FC69T | -4.473 |
| BC | FC69V | -4.724 |
| BC | FC69W | -5.642 |
| BC | FC69Y | 0.385  |
| BC | PC70A | 4.293  |
| BC | PC70C | -1.363 |
| BC | PC70D | 0.377  |
| BC | PC70E | 2.686  |

|    |       |       |
|----|-------|-------|
| BC | PC70F | 3.511 |
| BC | PC70G | 1.796 |
| BC | PC70H | 3.091 |
| BC | PC70I | 4.138 |
| BC | PC70K | 2.995 |
| BC | PC70L | 3.345 |
| BC | PC70M | 4.019 |
| BC | PC70N | 2.246 |
| BC | PC70Q | 3.124 |
| BC | PC70R | 3.545 |
| BC | PC70S | 3.410 |
| BC | PC70T | 3.066 |
| BC | PC70V | 4.580 |
| BC | PC70W | 1.564 |
| BC | PC70Y | 3.412 |

**Table S10.** Experimental data for CAPRI target T56.

| Chains | Mutation | Experiment enrichment value |
|--------|----------|-----------------------------|
| AG     | EG20A    | -0.903                      |
| AG     | EG20C    | -3.291                      |
| AG     | EG20D    | -0.980                      |
| AG     | EG20F    | -6.039                      |
| AG     | EG20G    | -1.731                      |
| AG     | EG20H    | -1.763                      |
| AG     | EG20I    | -3.268                      |
| AG     | EG20K    | -2.081                      |
| AG     | EG20L    | -1.115                      |
| AG     | EG20M    | -0.815                      |
| AG     | EG20N    | -1.425                      |
| AG     | EG20P    | -5.305                      |
| AG     | EG20Q    | 0.735                       |
| AG     | EG20R    | -1.289                      |
| AG     | EG20S    | 1.376                       |
| AG     | EG20T    | -1.519                      |
| AG     | EG20V    | -2.187                      |
| AG     | EG20W    | -2.096                      |
| AG     | EG20Y    | -4.147                      |
| BG     | SG14A    | 3.332                       |
| BG     | SG14C    | -2.934                      |
| BG     | SG14D    | -6.673                      |
| BG     | SG14E    | -4.407                      |
| BG     | SG14F    | -1.278                      |
| BG     | SG14G    | 3.089                       |
| BG     | SG14H    | -3.244                      |
| BG     | SG14I    | 3.385                       |
| BG     | SG14K    | 4.105                       |
| BG     | SG14L    | -1.572                      |
| BG     | SG14M    | -0.454                      |
| BG     | SG14N    | -1.109                      |
| BG     | SG14P    | -0.481                      |
| BG     | SG14Q    | -1.552                      |
| BG     | SG14R    | 4.669                       |
| BG     | SG14T    | 2.365                       |
| BG     | SG14V    | 3.781                       |
| BG     | SG14W    | -3.209                      |
| BG     | SG14Y    | -2.842                      |
| BG     | AG18C    | -7.432                      |
| BG     | AG18D    | -1.177                      |
| BG     | AG18E    | -4.987                      |
| BG     | AG18F    | -4.965                      |
| BG     | AG18G    | -3.106                      |
| BG     | AG18H    | -8.537                      |
| BG     | AG18I    | -6.721                      |
| BG     | AG18K    | 4.535                       |
| BG     | AG18L    | -4.917                      |
| BG     | AG18M    | -2.114                      |
| BG     | AG18N    | -1.500                      |
| BG     | AG18P    | -3.009                      |
| BG     | AG18Q    | -2.201                      |
| BG     | AG18R    | 1.657                       |
| BG     | AG18S    | -4.842                      |
| BG     | AG18T    | -2.677                      |
| BG     | AG18V    | -2.178                      |
| BG     | AG18W    | -4.534                      |
| BG     | AG18Y    | -7.443                      |



|    |       |        |
|----|-------|--------|
| BG | NG27A | -3.148 |
| BG | NG27C | -8.175 |
| BG | NG27D | -1.901 |
| BG | NG27E | -3.986 |
| BG | NG27F | -3.023 |
| BG | NG27G | -3.199 |
| BG | NG27H | -0.177 |
| BG | NG27I | -1.629 |
| BG | NG27K | 0.013  |
| BG | NG27L | -1.942 |
| BG | NG27M | -4.060 |
| BG | NG27P | -1.661 |
| BG | NG27Q | -1.502 |
| BG | NG27R | 1.835  |
| BG | NG27S | -1.003 |
| BG | NG27T | -0.334 |
| BG | NG27V | -2.780 |
| BG | NG27W | -2.315 |
| BG | NG27Y | -1.643 |
| BG | KG36A | -2.233 |
| BG | KG36C | -9.063 |
| BG | KG36D | -1.943 |
| BG | KG36E | -1.863 |
| BG | KG36F | -6.788 |
| BG | KG36G | -7.833 |
| BG | KG36H | -8.631 |
| BG | KG36I | -3.194 |
| BG | KG36L | -1.935 |
| BG | KG36M | -3.274 |
| BG | KG36N | -2.281 |
| BG | KG36P | -9.369 |
| BG | KG36Q | -4.332 |
| BG | KG36R | 0.220  |
| BG | KG36S | -3.384 |
| BG | KG36T | -5.875 |
| BG | KG36V | -0.362 |
| BG | KG36W | -8.867 |
| BG | KG36Y | -9.007 |
| BG | QG39A | 0.033  |
| BG | QG39C | -6.071 |
| BG | QG39D | -3.770 |
| BG | QG39E | -2.215 |
| BG | QG39F | 3.645  |
| BG | QG39G | -0.745 |
| BG | QG39H | -1.769 |
| BG | QG39I | -1.519 |
| BG | QG39K | -0.047 |
| BG | QG39L | -0.571 |
| BG | QG39M | 1.132  |
| BG | QG39N | -1.327 |
| BG | QG39P | -4.214 |
| BG | QG39R | 3.943  |
| BG | QG39S | -0.204 |
| BG | QG39T | -2.545 |
| BG | QG39V | -1.847 |
| BG | QG39W | -1.505 |
| BG | QG39Y | 4.157  |
| BG | YG40A | -4.425 |
| BG | YG40C | -2.771 |

|    |       |        |
|----|-------|--------|
| BG | YG40D | -0.321 |
| BG | YG40E | -6.051 |
| BG | YG40F | -2.459 |
| BG | YG40G | -5.420 |
| BG | YG40H | -2.547 |
| BG | YG40I | -4.101 |
| BG | YG40K | -5.856 |
| BG | YG40L | -3.016 |
| BG | YG40M | -2.094 |
| BG | YG40N | -2.205 |
| BG | YG40P | -4.310 |
| BG | YG40Q | -7.172 |
| BG | YG40R | -4.787 |
| BG | YG40S | -2.026 |
| BG | YG40T | -4.383 |
| BG | YG40V | -4.329 |
| BG | YG40W | -5.810 |
| BG | SG42A | 0.381  |
| BG | SG42C | -1.989 |
| BG | SG42D | -7.182 |
| BG | SG42E | -6.816 |
| BG | SG42F | -2.218 |
| BG | SG42G | -0.003 |
| BG | SG42H | 0.354  |
| BG | SG42I | -2.389 |
| BG | SG42K | 4.360  |
| BG | SG42L | -2.261 |
| BG | SG42M | 0.093  |
| BG | SG42N | -0.049 |
| BG | SG42P | -1.071 |
| BG | SG42Q | -1.624 |
| BG | SG42R | 4.766  |
| BG | SG42T | -0.248 |
| BG | SG42V | -2.978 |
| BG | SG42W | -1.567 |
| BG | SG42Y | -0.700 |

**Table S11.** Pairwise comparison of  $\Delta\Delta G_{bind}$  estimation results for the common mutations in TestSet1.

| Method    | Number of common mutations <sup>a</sup> | R <sup>b</sup> / $\sigma$ <sup>c</sup> / P-value <sup>d</sup> |                 |
|-----------|-----------------------------------------|---------------------------------------------------------------|-----------------|
|           |                                         | Control method                                                | SSIPE           |
| BeAtMuSiC | 508                                     | 0.47 / 1.80 / 8.6e-3                                          | 0.57 / 1.66 / - |
| BindProfX | 314                                     | 0.33 / 2.12 / 3.2e-3                                          | 0.49 / 1.38 / - |
| ELASPIC   | 500                                     | 0.53 / 1.74 / 5.4e-3                                          | 0.56 / 1.65 / - |
| EvoEF     | 734                                     | 0.53 / 2.36 / 4.1e-5                                          | 0.61 / 1.93 / - |
| FlexddG   | 547                                     | 0.59 / 2.04 / 3.6e-2                                          | 0.60 / 1.98 / - |
| FoldX     | 734                                     | 0.48 / 2.51 / 1.0e-4                                          | 0.61 / 1.93 / - |
| mCSM      | 178                                     | 0.28 / 1.82 / 3.6e-3                                          | 0.60 / 1.48 / - |
| MutaBind  | 167                                     | 0.55 / 1.78 / 6.4e-3                                          | 0.56 / 1.47 / - |
| SAAMBE    | 236                                     | 0.33 / 1.82 / 1.7e-3                                          | 0.49 / 1.56 / - |

<sup>a</sup>: The mutation data points that were used to train the control method were excluded for fair comparison. There were a total of 734 mutations in TestSet1, including 508 single and 226 multiple mutations. For BeAtMuSiC, EvoEF and FoldX, all of the mutations in TestSet1 have not been used for their training. For ELASPIC, it is not clear whether some of the data points in TestSet1 have been used for its training because its training dataset is not known.

<sup>b</sup>: R, PCC between predicted and experimental  $\Delta\Delta G_{bind}$  values.

<sup>c</sup>:  $\sigma$ , RMSE of  $\Delta\Delta G_{bind}$  estimation in kcal/mol.

<sup>d</sup>: P-value in Wilcoxon rank sum test for paired samples between the RMSE of SSIPE and that of the control method on the common mutations.

**Table S12.** Summary of reported prediction performance of methods tested in this work.

| Method                 | Dataset                        | PCC  | Error <sup>a</sup><br>(kcal/mol) | Comments                          |
|------------------------|--------------------------------|------|----------------------------------|-----------------------------------|
| BeAtMuSiC              | 2007 mutations                 | 0.40 | 1.80                             | Single mutation only              |
| BindProfX <sup>b</sup> | 1402 mutations (114 proteins)  | 0.66 | >1.70                            | RMSE is for single mutation       |
| ELASPIC                | 873 mutations from 54 proteins | 0.75 | 1.26                             | Single mutation only              |
| EvoEF                  | 2204 mutations (177 proteins)  | 0.51 | 2.07                             | Both single and multiple mutation |
| FlexddG                | 1240 mutations                 | 0.63 | 0.96                             | Both single and multiple mutation |
| mCSM                   | 2317 mutations (150 proteins)  | 0.80 | 1.25                             | Single mutation only              |
| MutaBind               | 1925 mutations (80 proteins)   | 0.68 | 1.41                             | Single mutation only              |
| SAAMBE <sup>c</sup>    | 1326 mutations (43 proteins)   | 0.62 | n. r.                            | Single mutation only              |

<sup>a</sup>: For FlexddG the reported standard error is MAE, while for the other methods the error is RMSE.

<sup>b</sup>: The RMSE for 1131 single mutations was 1.70 kcal/mol, but it's not shown for the overall dataset. As mentioned in the paper, the RMSE on multiple mutations was higher than single mutations.

<sup>c</sup>: The RMSE is not reported in the paper.

**Table S13.** Experimental and estimated  $\Delta\Delta G_{bind}$  and absolute estimation errors for selected mutations in 1LFD and 4WND. Experimental  $\Delta\Delta G_{bind}$  are used as ground truth, and the estimated  $\Delta\Delta G_{bind}$  are shown outside the parenthesis. The absolute estimation errors in the parenthesis are calculated as  $|\Delta\Delta G_{exp,bind} - \Delta\Delta G_{pre,bind}|$ , and the least estimated errors for each mutation is highlight in bold.

| Method       | $\Delta\Delta G_{bind}$ and absolute estimation error (kcal/mol) |                        |
|--------------|------------------------------------------------------------------|------------------------|
|              | DB33A                                                            | NA263R                 |
| Experimental | 1.100 (0.000)                                                    | -0.021 (0.000)         |
| BeAtMuSiC    | 0.730 (0.370)                                                    | 0.810 (0.831)          |
| BindProfX    | 2.176 (1.076)                                                    | 1.713 (1.734)          |
| ELASPIC      | 2.665 (1.565)                                                    | 1.335 (1.356)          |
| EvoEF        | 0.790 (0.310)                                                    | -1.180 (1.159)         |
| FlexddG      | 1.292 (0.192)                                                    | -1.283 (1.262)         |
| FoldX        | 0.420 (0.680)                                                    | 1.540 (1.561)          |
| mCSM         | 0.338 (0.762)                                                    | 0.594 (0.615)          |
| MutaBind     | 1.280 (0.180)                                                    | 2.050 (2.071)          |
| SAAMBE       | -0.236 (1.336)                                                   | 1.698 (1.719)          |
| SSIPe        | 1.068 ( <b>0.032</b> )                                           | 0.201 ( <b>0.222</b> ) |

## Supporting Figures

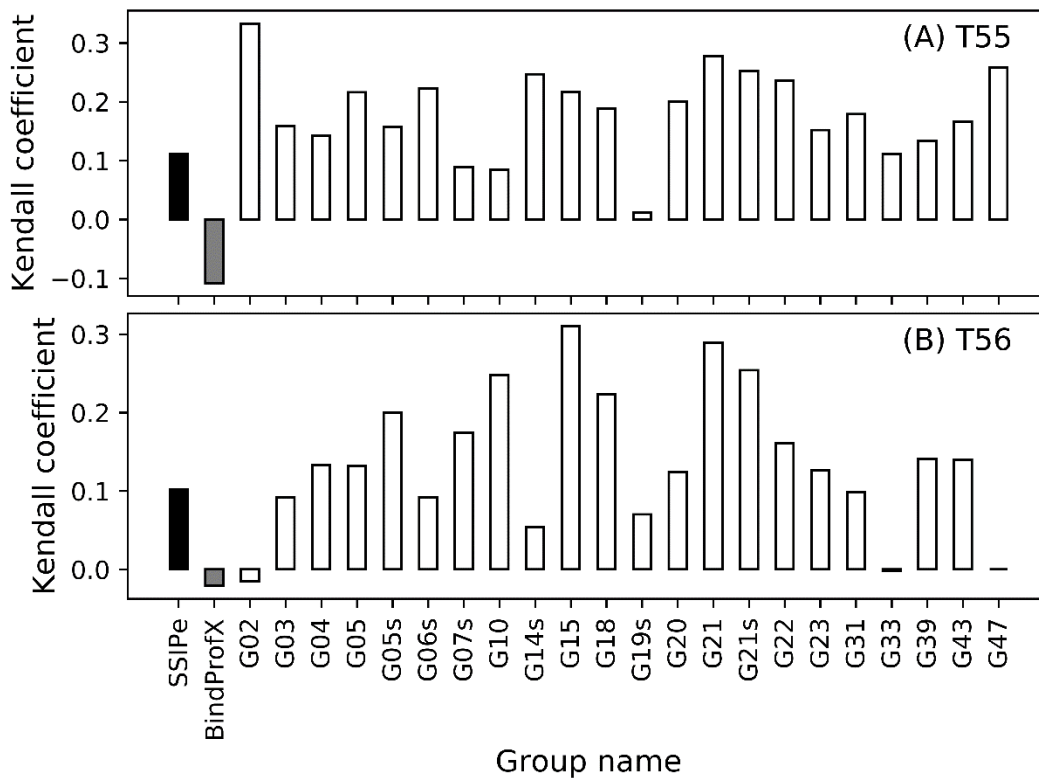

**Fig. S1.** Kendall's tau rank correlation coefficient between predictions and experiments during the 26<sup>th</sup> round of the CAPRI experiment (<http://www.ebi.ac.uk/msd-srv/capri/round26>). Only the results for interface mutations are illustrated. The results for SSIpe and BindProfX are depicted in black and gray, respectively. The results of other groups are taken from (Moretti, et al., 2013). (A) Target T55. (B) Target 56.

## References

- Brooks, B.R., *et al.* (1983) CHARMM: A program for macromolecular energy, minimization, and dynamics calculations, *J. Comput. Chem.*, **4**, 187-217.
- Gao, M. and Skolnick, J. (2010) iAlign: a method for the structural comparison of protein–protein interfaces, *Bioinformatics*, **26**, 2259-2265.
- Jones, J.E. (1924a) On the determination of molecular fields. I. From the variation of the viscosity of a gas with temperature, *Proc. R. Soc. Lond. A*, **106**, 441-462.
- Jones, J.E. (1924b) On the determination of molecular fields. II. From the equation of state of a gas, *Proc. R. Soc. Lond. A*, **106**, 463-477.
- Kortemme, T., *et al.* (2003) An Orientation-dependent Hydrogen Bonding Potential Improves Prediction of Specificity and Structure for Proteins and Protein–Protein Complexes, *J. Mol. Biol.*, **326**, 1239-1259.
- Lazaridis, T. and Karplus, M. (1999) Effective energy function for proteins in solution, *Proteins*, **35**, 133-152.
- Moretti, R., *et al.* (2013) Community-wide evaluation of methods for predicting the effect of mutations on protein-protein interactions, *Proteins*, **81**, 1980-1987.
- Pearce, R., *et al.* (2019) EvoDesign: Designing protein-protein binding interactions using evolutionary interface profiles in conjunction with an optimized physical energy function, *J. Mol. Biol.*, **431**, 2467-2476.
- Sitkoff, D., *et al.* (1994) Accurate Calculation of Hydration Free Energies Using Macroscopic Solvent Models, *The Journal of Physical Chemistry*, **98**, 1978-1988.
